# Supplementary material for: Efficient catalyst-free direct amidation of non-activated carboxylic acids from carbodiimides
Source: Royal Society of Chemistry journal article supplement (doi:10.1039/d2ob01322c), 2022-01-01

## Supporting Information

### Efficient Catalyst-Free Direct Amidation of Non-Activated Carboxylic Acids from Carbodiimides

Mehmet Mart<sup>a</sup>, Janusz Jurczak<sup>a\*</sup>, Idris Karakaya<sup>b\*</sup>

<sup>a</sup>Institute of Organic Chemistry, Polish Academy of Sciences, Kasprzaka, 44/52, 01-224, Warsaw, Poland

<sup>b</sup>Department of Chemistry, College of Basic Sciences, Gebze Technical University, 41400 Gebze, Turkey

Email: karakaya@gtu.edu.tr; jjurczak@icho.edu.pl

#### General considerations

All substrates were purchased commercially and used without purification. NMR measurements were carried out on a 400 MHz Bruker or 500 or 600 MHz Varian Mercury spectrometer. High-resolution mass spectra were performed using a Mariner mass spectrometry device from PerSeptive Biosystem. Thin-layer chromatography (TLC) was carried out using Merck silica gel 60 F254 precoated aluminum-backed plates (0.25 mm). Flash chromatography was applied on silica gel (230–400 mesh).

#### Synthesis of *N,N'*-diphenylcarbodiimide (**2c**)<sup>1</sup>

A 100 mL round bottom flask was filled with diphenylthiourea (2.19 mmol, 500 mg) and AgNO<sub>3</sub> (1.05 equiv., 2.30 mmol, 390 mg). Then, 30 mL of the mixed solvent (ACN/DCM, 1:1) were added and the reaction mixture cooled in a dry ice bath. Subsequently, Et<sub>3</sub>N (1.05 equiv., 2.30 mmol, 0.32 mL) were added. The resulted mixture was stirred for 16 h at ambient temperature. Afterwards, the mixed solvent was removed, the desired product was collected by column chromatography purification. Obtained as a yellowish liquid (212 mg, 50%), <sup>1</sup>H NMR (DMSO, 400 MHz): δ 7.44 – 7.34 (m, 4H), 7.31 – 7.18 (m, 6H).

#### General procedure of amidation

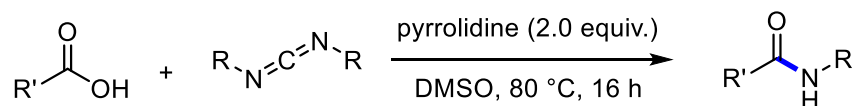

A 100 mL round-bottom flask was filled with acid (0.5 mmol) and carbodiimide (0.6 mmol). Then, 4 mL of the DMSO was added. The resulted solution was stirred for 2 h at 80 °C. Afterwards, pyrrolidine (1.0 mmol) was added. The resulted solution was stirred for 16 h at 80 °C. Subsequently, 20 mL of H<sub>2</sub>O was added and products were extracted with 3x10 mL DCM, the desired product was collected by column chromatography purification.

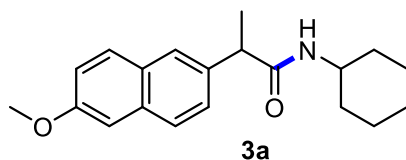

**N-Cyclohexyl-2-(6-methoxynaphthalen-2-yl)propanamide (3a):** Obtained as a white solid (143 mg, 92%), mp = 104-106 °C,  $^1\text{H}$  NMR ( $\text{CDCl}_3$ , 500 MHz):  $\delta$  7.71 – 7.69 (m, 2H), 7.65 (s, 1H), 7.37 (d,  $J = 8.4$  Hz, 1H), 7.15 (d,  $J = 8.9$  Hz, 1H), 7.12 (s, 1H), 5.27 (d,  $J = 6.1$  Hz, 1H), 3.91 (s, 3H), 3.77 – 3.70 (m, 1H), 3.64 (q,  $J = 6.8$  Hz, 1H), 1.90 – 1.75 (m, 3H), 1.57 (d,  $J = 7.1$  Hz, 3H), 1.34 – 1.27 (m, 3H), 1.07 – 0.88 (m, 4H);  $^{13}\text{C}$  NMR (101 MHz,  $\text{CDCl}_3$ ):  $\delta$  173.32, 157.73, 136.84, 133.70, 129.23, 129.01, 127.45, 126.31, 126.04, 119.06, 105.71, 55.32, 48.21, 47.15, 32.97, 32.90, 25.47, 24.80, 24.73, 18.64; HRMS (ESI-TOF) m/z:  $[\text{M}+\text{H}]^+$  calcd for  $\text{C}_{20}\text{H}_{26}\text{NO}_2$ , 312.1964; found 312.1969.

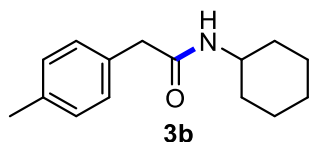

**N-Cyclohexyl-2-(p-tolyl)acetamide (3b)<sup>2</sup>:** Obtained as a white solid (101 mg, 88%),  $^1\text{H}$  NMR ( $\text{CDCl}_3$ , 400 MHz):  $\delta$  7.13 (d,  $J = 7.9$  Hz, 2H), 7.10 (d,  $J = 8.0$  Hz, 2H), 5.30 (s, 1H), 3.77 – 3.68 (m, 1H), 3.48 (s, 2H), 2.32 (s, 3H), 1.84 – 1.76 (m, 2H), 1.63 – 1.50 (m, 3H), 1.33 – 1.27 (m, 2H), 1.10 – 1.04 (m, 1H), 1.02 – 0.96 (m, 2H).

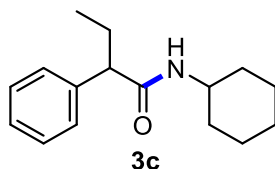

**N-Cyclohexyl-2-phenylbutanamide (3c)<sup>3</sup>:** Obtained as a white solid (98 mg, 80%),  $^1\text{H}$  NMR ( $\text{CDCl}_3$ , 400 MHz):  $\delta$  7.35 – 7.23 (m, 5H), 5.27 (d,  $J = 5.7$  Hz, 1H), 3.79 – 3.70 (m, 1H), 3.18 (t,  $J = 7.6$  Hz, 1H), 2.24 – 2.13 (m, 1H), 1.92 – 1.84 (m, 1H), 1.81 – 1.72 (m, 2H), 1.65 – 1.54 (m, 3H), 1.39 – 1.25 (m, 2H), 1.16 – 0.94 (m, 3H), 0.89 (t,  $J = 7.4$  Hz, 3H).

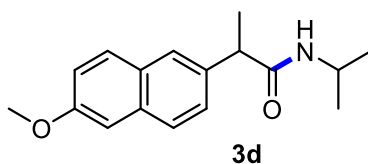

**N-Isopropyl-2-(6-methoxynaphthalen-2-yl)propanamide (3d):** Obtained as a white solid (118 mg, 87%), mp = 133-135 °C,  $^1\text{H}$  NMR ( $\text{CDCl}_3$ , 600 MHz):  $\delta$  7.70 (dd,  $J = 8.6, 3.4$  Hz, 2H), 7.64 (s, 1H), 7.35 (dd,  $J = 8.5, 1.5$  Hz, 1H), 7.15 (dd,  $J = 8.9, 2.4$  Hz, 1H), 7.12 (d,  $J = 2.1$

Hz, 1H), 5.13 (d,  $J = 5.1$  Hz, 1H), 4.07 – 4.01 (m, 1H), 3.91 (s, 3H), 3.62 (q,  $J = 7.1$  Hz, 1H), 1.57 (d,  $J = 7.2$  Hz, 3H), 1.04 (d,  $J = 6.6$  Hz, 3H), 0.99 (d,  $J = 6.5$  Hz, 3H);  $^{13}\text{C}$  NMR (151 MHz,  $\text{CDCl}_3$ )  $\delta$  173.32, 157.69, 136.70, 133.65, 129.19, 128.95, 127.46, 126.26, 126.04, 119.07, 105.62, 55.30, 47.11, 41.39, 22.60, 22.53, 18.60; HRMS (ESI-TOF)  $m/z$ :  $[\text{M}+\text{H}]^+$  calcd for  $\text{C}_{17}\text{H}_{22}\text{NO}_2$ , 294.1470; found 294.1469.

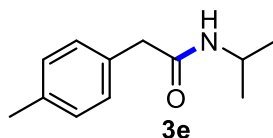

***N*-Isopropyl-2-(*p*-tolyl)acetamide (3e)<sup>4</sup>**: Obtained as a white solid (79 mg, 82%),  $^1\text{H}$  NMR ( $\text{CDCl}_3$ , 400 MHz):  $\delta$  7.16 (d,  $J = 8.1$  Hz, 2H), 7.13 (d,  $J = 8.2$  Hz, 2H), 5.19 (s, 1H), 4.12 – 4.00 (m, 1H), 3.50 (s, 2H), 2.35 (s, 3H), 1.07 (d,  $J = 6.6$  Hz, 6H).

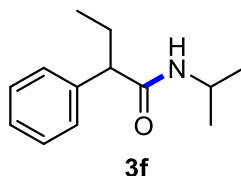

***N*-Isopropyl-2-phenylbutanamide (3f)<sup>5</sup>**: Obtained as a white solid (79 mg, 77%),  $^1\text{H}$  NMR ( $\text{CDCl}_3$ , 400 MHz):  $\delta$  7.35 – 7.23 (m, 5H), 5.27 (s, 1H), 4.09 – 4.01 (m, 1H), 3.17 (t,  $J = 7.6$  Hz, 1H), 2.23 – 2.12 (m, 1H), 1.81 – 1.72 (m, 1H), 1.10 (d,  $J = 6.6$  Hz, 3H), 1.03 (d,  $J = 6.6$  Hz, 3H), 0.88 (t,  $J = 7.4$  Hz, 3H).

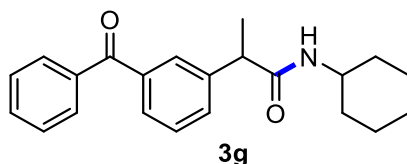

**2-(3-Benzoylphenyl)-*N*-cyclohexylpropanamide (3g)<sup>6</sup>**: Obtained as a white solid (119 mg, 71%),  $^1\text{H}$  NMR ( $\text{CDCl}_3$ , 400 MHz):  $\delta$  7.79 (d,  $J = 7.4$  Hz, 2H), 7.73 (s, 1H), 7.67 (d,  $J = 7.6$  Hz, 1H), 7.63 – 7.55 (m, 2H), 7.53 – 7.41 (m, 3H), 5.31 (d,  $J = 7.1$  Hz, 1H), 3.78 – 3.69 (m, 1H), 3.57 (q,  $J = 7.1$  Hz, 1H), 1.89 – 1.79 (m, 2H), 1.67 – 1.57 (m, 3H), 1.53 (d,  $J = 7.1$  Hz, 3H), 1.38 – 1.27 (m, 2H), 1.16 – 0.96 (m, 3H).

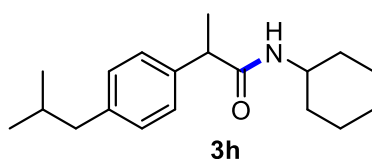

***N*-Cyclohexyl-2-(4-isobutylphenyl)propanamide (3h)<sup>7</sup>**: Obtained as a white solid (101 mg, 70%), mp = 90-93 °C, <sup>1</sup>H NMR (CDCl<sub>3</sub>, 400 MHz): δ 7.18 (d, *J* = 8.0 Hz, 2H), 7.11 (d, *J* = 8.1 Hz, 2H), 5.19 (d, *J* = 6.3 Hz, 1H), 3.81 – 3.66 (m, 1H), 3.49 (q, *J* = 7.2 Hz, 1H), 2.46 (d, *J* = 7.2 Hz, 2H), 1.91 – 1.76 (m, 3H), 1.61 – 1.53 (m, 3H), 1.50 (d, *J* = 7.2 Hz, 3H), 1.38 – 1.26 (m, 2H), 1.15 – 0.96 (m, 3H), 0.90 (d, *J* = 6.6 Hz, 6H); <sup>13</sup>C NMR (101 MHz, CDCl<sub>3</sub>) δ 173.48, 140.55, 138.84, 129.54, 127.29, 47.98, 46.84, 45.01, 32.87, 32.78, 30.15, 25.50, 24.64, 24.60, 22.34, 18.49; HRMS (ESI-TOF) *m/z*: [M+H]<sup>+</sup> calcd for C<sub>19</sub>H<sub>30</sub>NO, 288.2327; found 288.2336.

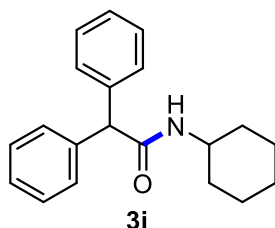

***N*-Cyclohexyl-2,2-diphenylacetamide (3i)<sup>8</sup>**: Obtained as a white solid (98 mg, 67%), <sup>1</sup>H NMR (CDCl<sub>3</sub>, 400 MHz): δ 7.35 – 7.25 (m, 10H), 5.44 (s, 1H), 4.90 (s, 1H), 3.93 – 3.77 (m, 1H), 1.89 (d, *J* = 9.3 Hz, 2H), 1.69 – 1.53 (m, 3H), 1.43 – 1.28 (m, 2H), 1.19 – 1.01 (m, 3H).

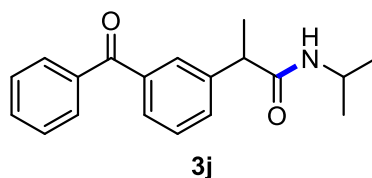

**2-(3-Benzoylphenyl)-*N*-isopropylpropanamide (3j)<sup>9</sup>**: Obtained as a white solid (115 mg, 78%), <sup>1</sup>H NMR (CDCl<sub>3</sub>, 400 MHz): δ 7.82 – 7.77 (m, 2H), 7.73 (s, 1H), 7.67 (d, *J* = 7.6 Hz, 1H), 7.62 – 7.55 (m, 2H), 7.50 – 7.43 (m, 3H), 5.32 (d, *J* = 6.3 Hz, 1H), 4.09 – 4.01 (m, 1H), 3.56 (q, *J* = 7.1 Hz, 1H), 1.52 (d, *J* = 7.1 Hz, 3H), 1.11 (d, *J* = 6.6 Hz, 3H), 1.05 (d, *J* = 6.6 Hz, 3H).

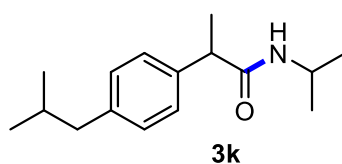

**2-(4-Isobutylphenyl)-*N*-isopropylpropanamide (3k)<sup>10</sup>**: Obtained as a white solid (95 mg, 77%), <sup>1</sup>H NMR (CDCl<sub>3</sub>, 600 MHz): δ 7.16 (d, *J* = 7.4 Hz, 2H), 7.10 (d, *J* = 7.4 Hz, 2H), 5.08 (s, 1H), 4.04 – 3.99 (m, 1H), 3.46 (q, *J* = 6.8 Hz, 1H), 2.44 (d, *J* = 7.0 Hz, 2H), 1.86 – 1.82 (m, 1H), 1.48 (d, *J* = 6.9 Hz, 3H), 1.05 (d, *J* = 6.2 Hz, 3H), 1.00 (d, *J* = 6.3 Hz, 3H), 0.88 (d, *J* = 6.3 Hz, 6H).

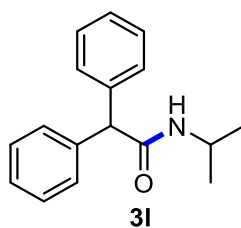

***N*-Isopropyl-2,2-diphenylacetamide (3l)**<sup>8</sup>: Obtained as a white solid (79 mg, 62%), <sup>1</sup>H NMR (CDCl<sub>3</sub>, 400 MHz): δ 7.38 – 7.30 (m, 4H), 7.26 (d, *J* = 7.3 Hz, 6H), 5.41 (s, 1H), 4.88 (s, 1H), 4.19 – 4.11 (m, 1H), 1.12 (d, *J* = 6.6 Hz, 6H).

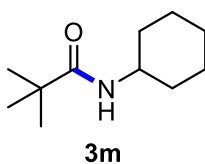

***N*-Cyclohexylpivalamide (3m)**<sup>11</sup>: Obtained as a white solid (62 mg, 68%), <sup>1</sup>H NMR (CDCl<sub>3</sub>, 400 MHz): δ 5.44 (s, 1H), 3.78 – 3.69 (m, 1H), 1.94 – 1.83 (m, 2H), 1.74 – 1.55 (m, 3H), 1.43 – 1.30 (m, 2H), 1.17 (s, 9H), 1.12 – 1.08 (m, 3H).

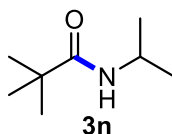

***N*-Isopropylpivalamide (3n)**<sup>12</sup>: Obtained as a white solid (52 mg, 73%), <sup>1</sup>H NMR (CDCl<sub>3</sub>, 400 MHz): δ 5.37 (s, 1H), 4.08 – 4.04 (m, 1H), 1.18 (s, 9H), 1.14 (d, *J* = 6.4 Hz, 6H).

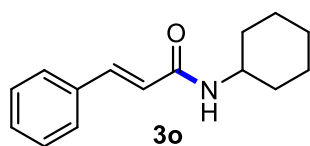

***N*-Cyclohexylcinnamamide (3o)**<sup>13</sup>: Obtained as a white solid (70 mg, 61%), <sup>1</sup>H NMR (CDCl<sub>3</sub>, 400 MHz): δ 7.61 (d, *J* = 15.6 Hz, 1H), 7.50 – 7.48 (m, 2H), 7.43 – 7.29 (m, 3H), 6.40 (d, *J* = 15.6 Hz, 1H), 5.67 (d, *J* = 7.1 Hz, 1H), 3.97 – 3.88 (m, 1H), 2.05 – 1.98 (m, 2H), 1.81 – 1.68 (m, 2H), 1.70 – 1.59 (m, 1H), 1.48 – 1.34 (m, 2H), 1.28 – 1.12 (m, 3H).

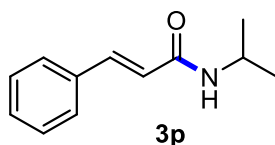

***N*-Isopropylcinnamamide (3p)**<sup>14</sup>: Obtained as a white solid (61 mg, 64%), <sup>1</sup>H NMR (CDCl<sub>3</sub>, 400 MHz): δ 7.61 (d, *J* = 15.6 Hz, 1H), 7.51 – 7.30 (m, 5H), 6.40 (d, *J* = 15.6 Hz, 1H), 5.77 (s, 1H), 4.31 – 4.18 (m, 1H), 1.22 (d, *J* = 6.5 Hz, 6H).

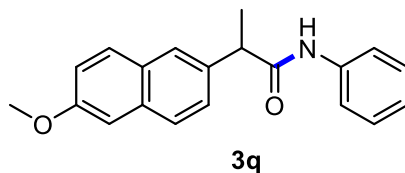

**2-(6-methoxynaphthalen-2-yl)-*N*-phenylpropanamide (3q)**<sup>15</sup>: Obtained as a white solid (137 mg, 90%), <sup>1</sup>H NMR (CDCl<sub>3</sub>, 500 MHz): δ 7.69 – 7.65 (m, 3H), 7.37 – 7.32 (m, 3H), 7.19 – 7.16 (m, 2H), 7.10 (dd, *J* = 8.9, 2.4 Hz, 1H), 7.07 (d, *J* = 2.2 Hz, 1H), 7.04 (s, 1H), 6.98 (t, *J* = 7.4 Hz, 1H), 3.85 (s, 3H), 3.78 (q, *J* = 7.1 Hz, 1H), 1.60 (d, *J* = 7.1 Hz, 3H).

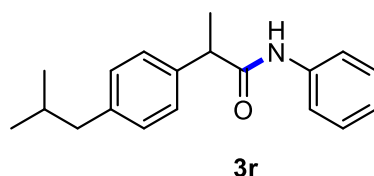

**2-(4-isobutylphenyl)-*N*-phenylpropanamide (3r)**<sup>16</sup>: Obtained as a white solid (107 mg, 76%), <sup>1</sup>H NMR (CDCl<sub>3</sub>, 600 MHz): δ 7.39 (d, *J* = 7.9 Hz, 2H), 7.27 – 7.23 (m, 4H), 7.15 (d, *J* = 8.0 Hz, 2H), 7.05 (t, *J* = 7.4 Hz, 1H), 7.01 (s, 1H), 3.68 (q, *J* = 7.2 Hz, 1H), 2.46 (d, *J* = 7.2 Hz, 2H), 1.90 – 1.81 (m, 1H), 1.58 (d, *J* = 7.2 Hz, 3H), 0.90 (d, *J* = 6.6 Hz, 6H).

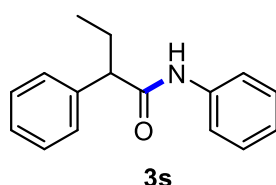

***N*,2-diphenylbutanamide (3s)**<sup>17</sup>: Obtained as a white solid (105 mg, 88%), <sup>1</sup>H NMR (CDCl<sub>3</sub>, 500 MHz): δ 7.36 (d, *J* = 7.9 Hz, 2H), 7.29 (d, *J* = 4.4 Hz, 4H), 7.24 – 7.16 (m, 3H), 7.05 (s, 1H), 6.99 (t, *J* = 7.4 Hz, 1H), 3.32 (t, *J* = 7.5 Hz, 1H), 2.26 – 2.16 (m, 1H), 1.85 – 1.75 (m, 1H), 0.86 (t, *J* = 7.4 Hz, 3H).

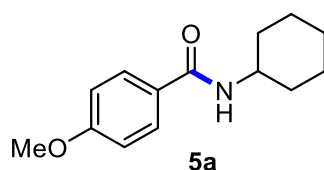

***N*-Cyclohexyl-4-methoxybenzamide (5a)**<sup>18</sup>: Obtained as a white solid (85 mg, 73%), <sup>1</sup>H NMR (CDCl<sub>3</sub>, 400 MHz): δ 7.72 (d, *J* = 8.7 Hz, 2H), 6.90 (d, *J* = 8.7 Hz, 2H), 5.95 (d, *J* = 5.3 Hz,

1H), 4.04 – 3.89 (m, 1H), 3.84 (s, 3H), 2.02 (d,  $J = 9.4$  Hz, 2H), 1.80 – 1.61 (m, 3H), 1.47 – 1.38 (m, 2H), 1.30 – 1.13 (m, 3H).

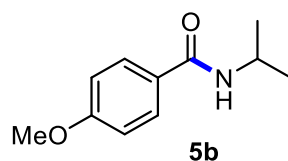

***N*-Isopropyl-4-methoxybenzamide (5b)**<sup>19</sup>: Obtained as a white solid (85 mg, 88%), <sup>1</sup>H NMR (CDCl<sub>3</sub>, 600 MHz):  $\delta$  7.70 (d,  $J = 8.0$  Hz, 2H), 6.89 (d,  $J = 8.0$  Hz, 2H), 5.85 (s, 1H), 4.30 – 4.20 (m, 1H), 3.83 (s, 3H), 1.24 (d,  $J = 6.2$  Hz, 6H).

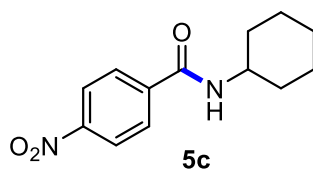

***N*-Cyclohexyl-4-nitrobenzamide (5c)**<sup>20</sup>: Obtained as a white solid (93 mg, 75%), <sup>1</sup>H NMR (CDCl<sub>3</sub>, 400 MHz):  $\delta$  8.29 (d,  $J = 8.9$  Hz, 2H), 7.92 (d,  $J = 8.9$  Hz, 2H), 6.00 (d,  $J = 5.7$  Hz, 1H), 4.05 – 3.95 (m, 1H), 2.08 – 2.04 (m, 2H), 1.84 – 1.64 (m, 3H), 1.53 – 1.39 (m, 2H), 1.34 – 1.18 (m, 3H).

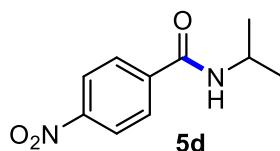

***N*-Isopropyl-4-nitrobenzamide (5d)**<sup>21</sup>: Obtained as a white solid (84 mg, 81%), <sup>1</sup>H NMR (CDCl<sub>3</sub>, 400 MHz):  $\delta$  8.29 (d,  $J = 8.8$  Hz, 2H), 7.92 (d,  $J = 8.8$  Hz, 2H), 5.98 (s, 1H), 4.40 – 4.30 (m, 1H), 1.31 (d,  $J = 6.6$  Hz, 6H).

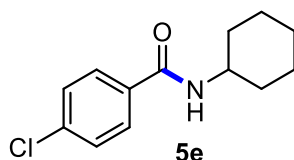

**4-Chloro-*N*-cyclohexylbenzamide (5e)**<sup>13</sup>: Obtained as a white solid (113 mg, 95%), <sup>1</sup>H NMR (CDCl<sub>3</sub>, 400 MHz):  $\delta$  7.69 (d,  $J = 8.5$  Hz, 2H), 7.39 (d,  $J = 8.5$  Hz, 2H), 5.97 (s, 1H), 4.01 – 3.92 (m, 1H), 2.05 – 2.01 (m, 2H), 1.81 – 1.71 (m, 2H), 1.68 – 1.64 (m, 1H), 1.49 – 1.35 (m, 2H), 1.30 – 1.16 (m, 3H).

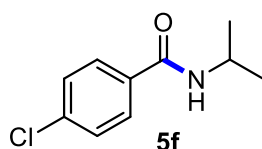

**4-Chloro-*N*-isopropylbenzamide (5f)**<sup>22</sup>: Obtained as a white solid (84 mg, 86%), <sup>1</sup>H NMR (CDCl<sub>3</sub>, 400 MHz): δ 7.69 (d, *J* = 8.5 Hz, 2H), 7.38 (d, *J* = 8.5 Hz, 2H), 6.01 (s, 1H), 4.31 – 4.22 (m, 1H), 1.26 (d, *J* = 6.6 Hz, 6H).

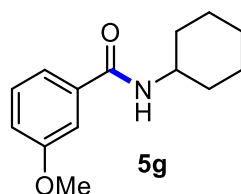

***N*-Cyclohexyl-3-methoxybenzamide (5g)**<sup>23</sup>: Obtained as a white solid (90 mg, 77%), <sup>1</sup>H NMR (CDCl<sub>3</sub>, 400 MHz): δ 7.35 – 7.29 (m, 2H), 7.28 – 7.24 (m, 1H), 7.05 – 6.98 (m, 1H), 6.00 (s, 1H), 4.03 – 3.91 (m, 1H), 3.85 (s, 3H), 2.05 – 2.01 (m, 2H), 1.78 – 1.64 (m, 3H), 1.50 – 1.36 (m, 2H), 1.29 – 1.19 (m, 3H).

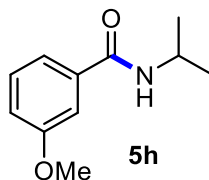

***N*-Isopropyl-3-methoxybenzamide (5h)**<sup>24</sup>: Obtained as a white solid (80 mg, 83%), <sup>1</sup>H NMR (CDCl<sub>3</sub>, 400 MHz): δ 7.37 – 7.23 (m, 3H), 7.03 – 7.00 (m, 1H), 6.00 (s, 1H), 4.34 – 4.21 (m, 1H), 3.84 (s, 3H), 1.26 (d, *J* = 6.6 Hz, 6H).

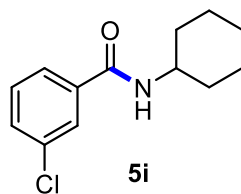

**3-Chloro-*N*-cyclohexylbenzamide (5i)**<sup>23</sup>: Obtained as a white solid (57 mg, 48%), <sup>1</sup>H NMR (CDCl<sub>3</sub>, 400 MHz): δ 7.73 (s, 1H), 7.63 (d, *J* = 7.7 Hz, 1H), 7.46 (d, *J* = 8.0 Hz, 1H), 7.36 (t, *J* = 7.8 Hz, 1H), 5.95 (s, 1H), 3.99 – 3.93 (m, 1H), 2.09 – 1.98 (m, 2H), 1.80 – 1.65 (m, 3H), 1.47 – 1.37 (m, 2H), 1.29 – 1.17 (m, 3H).



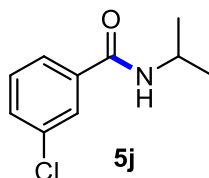

**3-Chloro-*N*-isopropylbenzamide (5j)**<sup>25</sup>: Obtained as a white solid (57 mg, 58%), <sup>1</sup>H NMR (CDCl<sub>3</sub>, 400 MHz): δ 7.74 (s, 1H), 7.63 (d, *J* = 7.7 Hz, 1H), 7.46 (d, *J* = 8.0 Hz, 1H), 7.37 (t, *J* = 7.8 Hz, 1H), 5.90 (s, 1H), 4.33 – 4.24 (m, 1H), 1.28 (d, *J* = 6.6 Hz, 6H).

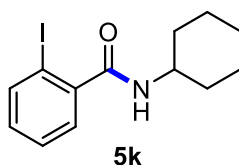

***N*-Cyclohexyl-2-iodobenzamide (5k)**<sup>26</sup>: Obtained as a white solid (58 mg, 35%), <sup>1</sup>H NMR (CDCl<sub>3</sub>, 400 MHz): δ 7.85 (d, *J* = 8.0 Hz, 1H), 7.38 (q, *J* = 7.5 Hz, 2H), 7.15 – 7.01 (m, 1H), 5.64 (s, 1H), 4.10 – 3.91 (m, 1H), 2.10 – 2.07 (m, 2H), 1.80 – 1.62 (m, 3H), 1.49 – 1.40 (m, 2H), 1.33 – 1.19 (m, 3H).

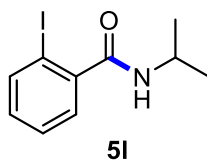

**2-Iodo-*N*-isopropylbenzamide (5l)**<sup>25</sup>: Obtained as a white solid (65 mg, 45%), <sup>1</sup>H NMR (CDCl<sub>3</sub>, 400 MHz): δ 7.88 – 7.81 (m, 1H), 7.45 – 7.31 (m, 2H), 7.11 – 7.06 (m, 1H), 5.59 (s, 1H), 4.38 – 4.22 (m, 1H), 1.29 (d, *J* = 6.6 Hz, 6H).

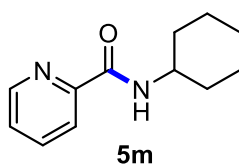

***N*-Cyclohexylpicolinamide (5m)**<sup>27</sup>: Obtained as a white solid (74 mg, 73%), <sup>1</sup>H NMR (CDCl<sub>3</sub>, 400 MHz): δ 8.54 (ddd, *J* = 4.8, 1.6, 0.9 Hz, 1H), 8.25 – 8.17 (m, 1H), 7.96 (s, 1H), 7.84 (td, *J* = 7.7, 1.7 Hz, 1H), 7.41 (ddd, *J* = 7.6, 4.8, 1.2 Hz, 1H), 4.04 – 3.92 (m, 1H), 2.07 – 1.97 (m, 2H), 1.82 – 1.71 (m, 2H), 1.71 – 1.61 (m, 1H), 1.52 – 1.18 (m, 5H).

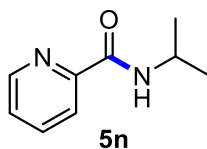

***N*-Isopropylpicolinamide (5n)<sup>28</sup>**: Obtained as a white solid (67 mg, 82%), <sup>1</sup>H NMR (CDCl<sub>3</sub>, 400 MHz): δ 8.55 (ddd, *J* = 4.8, 1.6, 0.9 Hz, 1H), 8.21 (dt, *J* = 7.8, 1.0 Hz, 1H), 7.89 (s, H), 7.84 (td, *J* = 7.7, 1.7 Hz, 1H), 7.43 – 7.40 (m, 1H), 4.35 – 4.23 (m, 1H), 1.30 (d, *J* = 6.6 Hz, 6H).

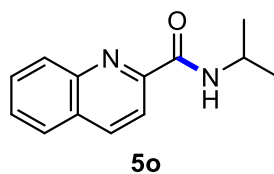

***N*-isopropylquinoline-2-carboxamide (5o)<sup>29</sup>**: Obtained as a white solid (72 mg, 67%), <sup>1</sup>H NMR (CDCl<sub>3</sub>, 500 MHz): δ 8.35 – 8.29 (m, 2H), 8.14 (d, *J* = 8.5 Hz, 2H), 7.88 (d, *J* = 8.2 Hz, 1H), 7.79 – 7.75 (m, 1H), 7.64 – 7.59 (m, 1H), 4.40 – 4.29 (m, 1H), 1.35 (d, *J* = 6.6 Hz, 6H).

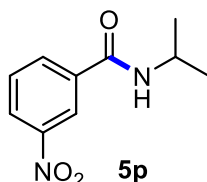

***N*-isopropyl-3-nitrobenzamide (5p)<sup>2</sup>**: Obtained as a white solid (66 mg, 63%), <sup>1</sup>H NMR (CDCl<sub>3</sub>, 500 MHz): δ 8.55 (s, 1H), 8.35 (d, *J* = 8.2 Hz, 1H), 8.15 (d, *J* = 7.5 Hz, 1H), 7.64 (t, *J* = 7.9 Hz, 1H), 6.03 (s, 1H), 4.35 – 4.28 (m, 1H), 1.31 (d, *J* = 6.5 Hz, 6H).

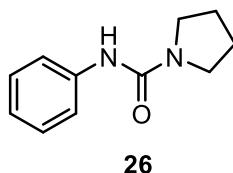

***N*-phenylpyrrolidine-1-carboxamide (urea, 26)<sup>30</sup>**: Obtained as a white solid, <sup>1</sup>H NMR (400 MHz, CDCl<sub>3</sub>) δ 7.42 (d, *J* = 7.8 Hz, 2H), 7.28 (t, *J* = 7.9 Hz, 2H), 7.01 (t, *J* = 7.3 Hz, 1H), 6.21 (s, 1H), 3.46 (t, *J* = 6.6 Hz, 4H), 1.97 (t, *J* = 6.6 Hz, 4H).

## References

1. A. M. Camelio, A. Krasovskiy, B. Bailey and A. Davis, *J. Org. Chem.*, 2022, **87**, 2022-2044.
2. F. Panahi, F. Jamedi and N. Iranpoor, *Eur. J. Org. Chem.*, 2016, **2016**, 780-788.
3. L. M. Mori-Quiroz, K. W. Shimkin, S. Rezazadeh, R. A. Kozlowski and D. A. Watson, *Chem-Eur. J.*, 2016, **22**, 15654-15658.
4. D. G. Pintori and M. F. Greaney, *Org. Lett.*, 2011, **13**, 5713-5715.
5. X. Y. Hu, S. H. Hao, Y. Wei, Z. L. Wang, H. M. Wang, Y. C. Feng and Q. X. Qin, *Tetrahedron Lett.*, 2022, **95**, 153731

6. Z. Rajic, D. Hadjipavlou-Litina, E. Pontiki, M. Kralj, L. Suman and B. Zorc, *Chem. Biol. Drug. Des.*, 2010, **75**, 641-652.
7. Y. Yuan, F. Q. Zhao and X. F. Wu, *Chem. Sci.*, 2021, **12**, 12676-12681.
8. X. Jin, M. Willeke, R. Lucchesi, C. G. Daniliuc, R. Frohlich, B. Wibbeling, W. Uhl and E. U. Wurthwein, *J. Org. Chem.*, 2015, **80**, 6062-6075.
9. Bhardwaj, Tilak Raj; et al, India, IN2008DE02354 A 2010-04-23
10. S. A. N. Mehta, S. Thareja, P. Malla, M. Misra, T. Bhardwaj and M. Kumar, *ChemTech.*, 2010, **2**, 233-238.
11. H. Q. Do, S. Bachman, A. C. Bissember, J. C. Peters and G. C. Fu, *J. Am. Chem. Soc.*, 2014, **136**, 2162-2167.
12. T. T. Chen, A. E. Wang and P. Q. Huang, *Org. Lett.*, 2019, **21**, 3808-3812.
13. C. Duangkamol, S. Jaita, S. Wangngae, W. Phakhodee and M. Pattarawarapan, *RSC Adv.*, 2015, **5**, 52624-52628.
14. T. Sato, A. Ohno, S. M. Sarkar, Y. Uozumi and Y. M. A. Yamada, *Chemcatchem.*, 2015, **7**, 2141-2148.
15. Y. H. Yao, H. Y. Yang, M. Chen, F. Wu, X. X. Xu and Z. H. Guan, *J. Am. Chem. Soc.*, 2021, **143**, 85-91.
16. Q. Gou, Q. Chen, Q. Tan, M. Zhu, H. Huang, M. Deng, W. Yi and S. He, *Org. Lett.*, 2022, **24**, 3549-3554.
17. Y. P. Zhu, S. Sergeev, P. Franck, R. V. Orru and B. U. Maes, *Org. Lett.*, 2016, **18**, 4602-4605.
18. S. Wangngae, C. Duangkamol, M. Pattarawarapan and W. Phakhodee, *RSC Adv.*, 2015, **5**, 25789-25793.
19. J. Kraiem and T. Ollevier, *Green Chem.*, 2017, **19**, 1263-1267.
20. C. Dankers, J. Tadros, D. G. Harman, J. R. Aldrich-Wright, T. V. Nguyen and C. P. Gordon, *ACS Comb. Sci.*, 2020, **22**, 255-267.
21. R. N. Ram, N. Kumar and N. Singh, *J. Org. Chem.*, 2010, **75**, 7408-7411.
22. S. H. Lee and G. I. Nikonov, *Dalton T.*, 2014, **43**, 8888-8893.
23. X. D. Lang and L. N. He, *Chemsuschem.*, 2018, **11**, 2062-2067.
24. C. G. Jorgensen, B. Frolund, J. Kehler and A. A. Jensen, *Chemmedchem.*, 2011, **6**, 725-736.
25. M. T. Shea, G. T. Rohde, Y. A. Vlasenko, P. S. Postnikov, M. S. Yusubov, V. V. Zhdankin, A. Saito and A. Yoshimura, *Molecules*, 2021, **26**.
26. F. Chahdoura, S. Mallet-Ladeira and M. Gomez, *Org. Chem. Front.*, 2015, **2**, 312-318.

27. E. T. Nadres, G. I. F. Santos, D. Shabashov and O. Daugulis, *J. Org. Chem.*, 2013, **78**, 9689-9714.
28. A. C. Maguire, V. Kumar and S. J. Connon, *Chem. Commun.*, 2019, **55**, 13526-13529.
29. T. Gonec, P. Bobal, J. Sujan, M. Pesko, J. H. Guo, K. Kralova, L. Pavlacka, L. Vesely, E. Kreckova, J. Kos, A. Coffey, P. Kollar, A. Imramovsky, L. Placek and J. Jampilek, *Molecules*, 2012, **17**, 613-644.
30. L. Mistry, K. Mapesa, T. W. Bousfield and J. E. Camp, Synthesis of ureas in the bio-alternative solvent Cyrene, *Green Chem.*, 2017, **19**, 2123-2128.

## Spectral Data

$^1\text{H}$  NMR (DMSO, 400 MHz) spectrum of *N,N'*-diphenylcarbodiimide (**2c**)

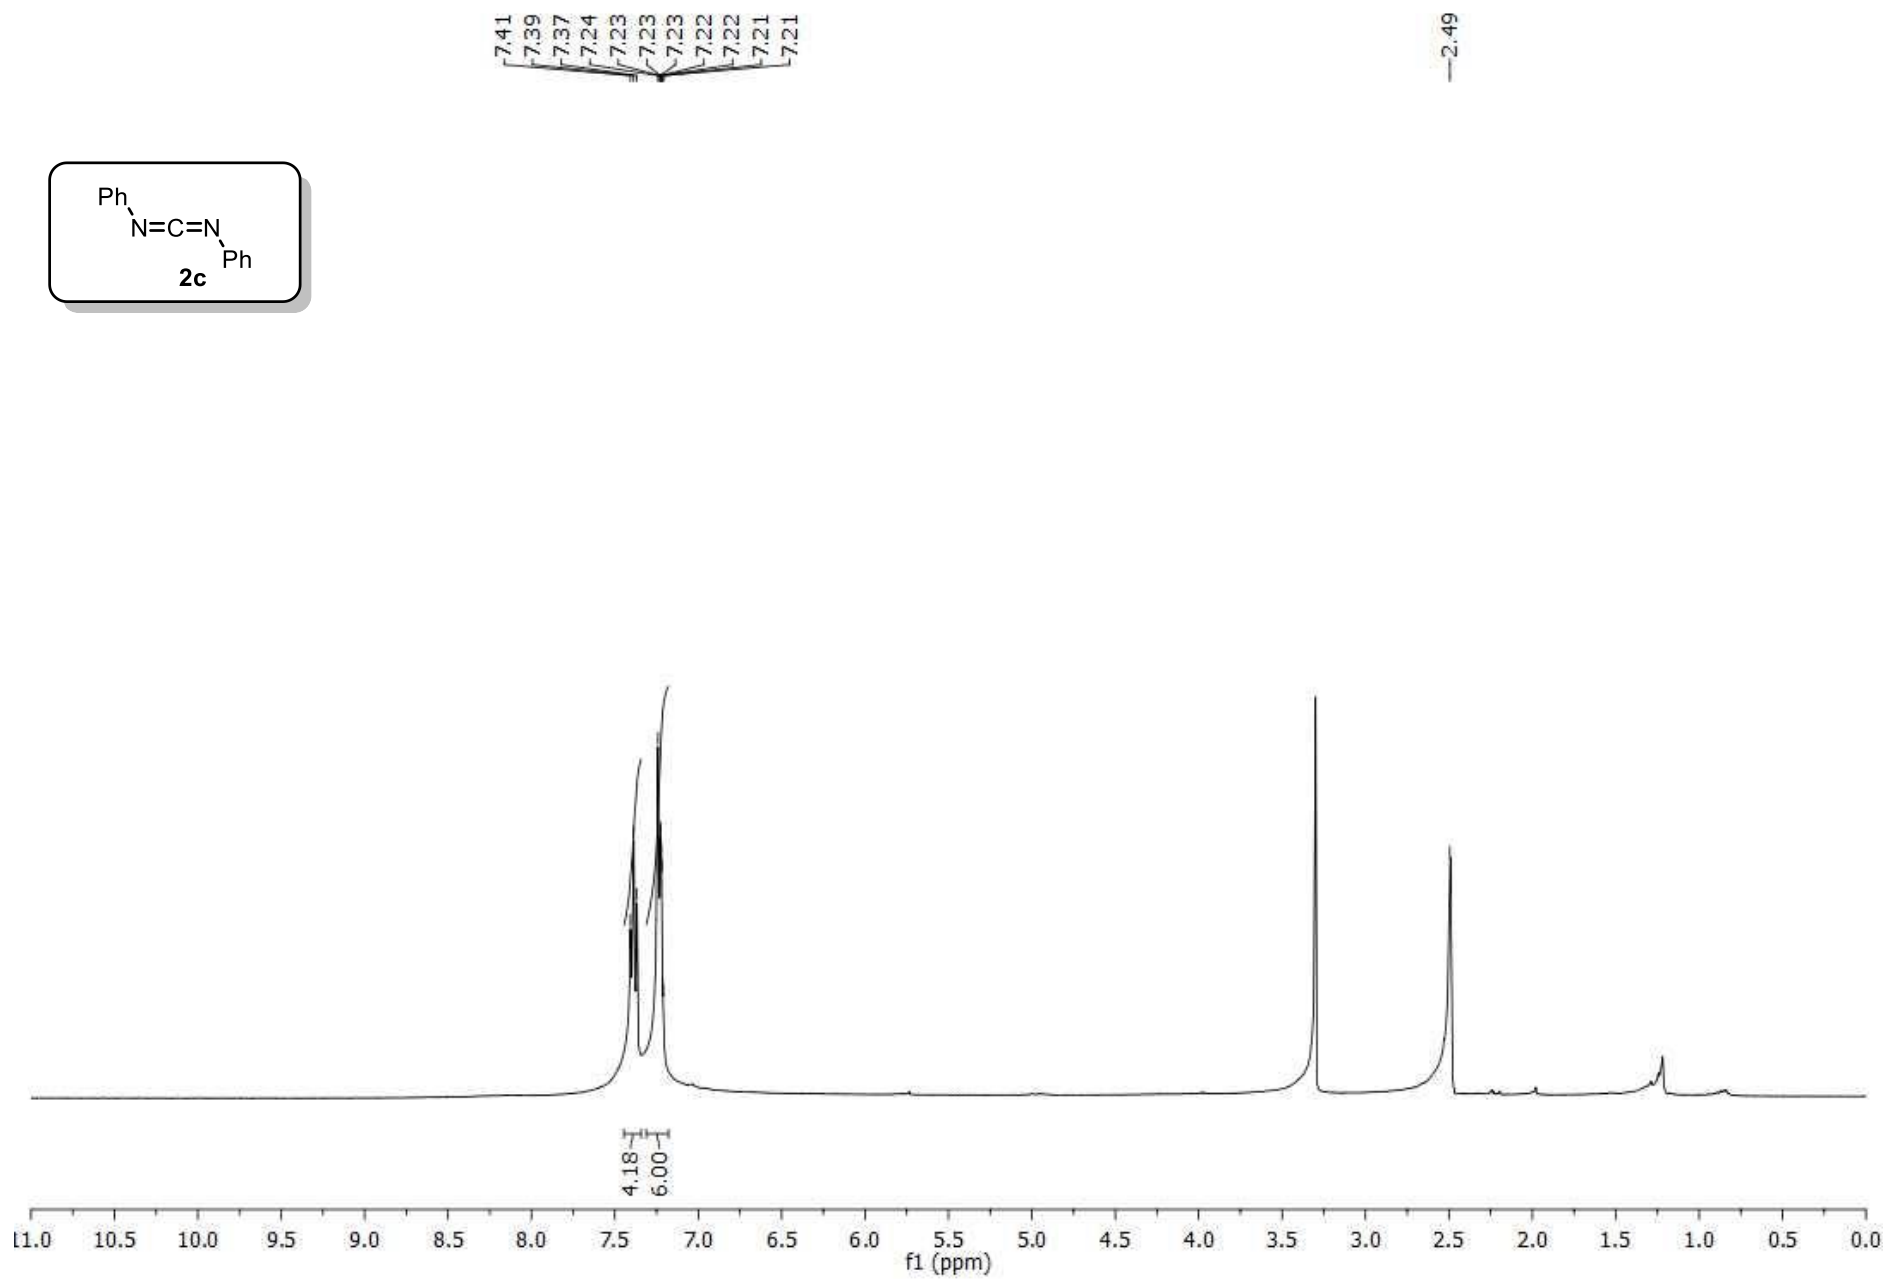

<sup>1</sup>H NMR (CDCl<sub>3</sub>, 400 MHz) spectrum of *N*-Cyclohexyl-2-(6-methoxynaphthalen-2-yl)propanamide (**3a**)

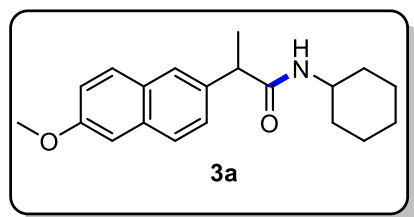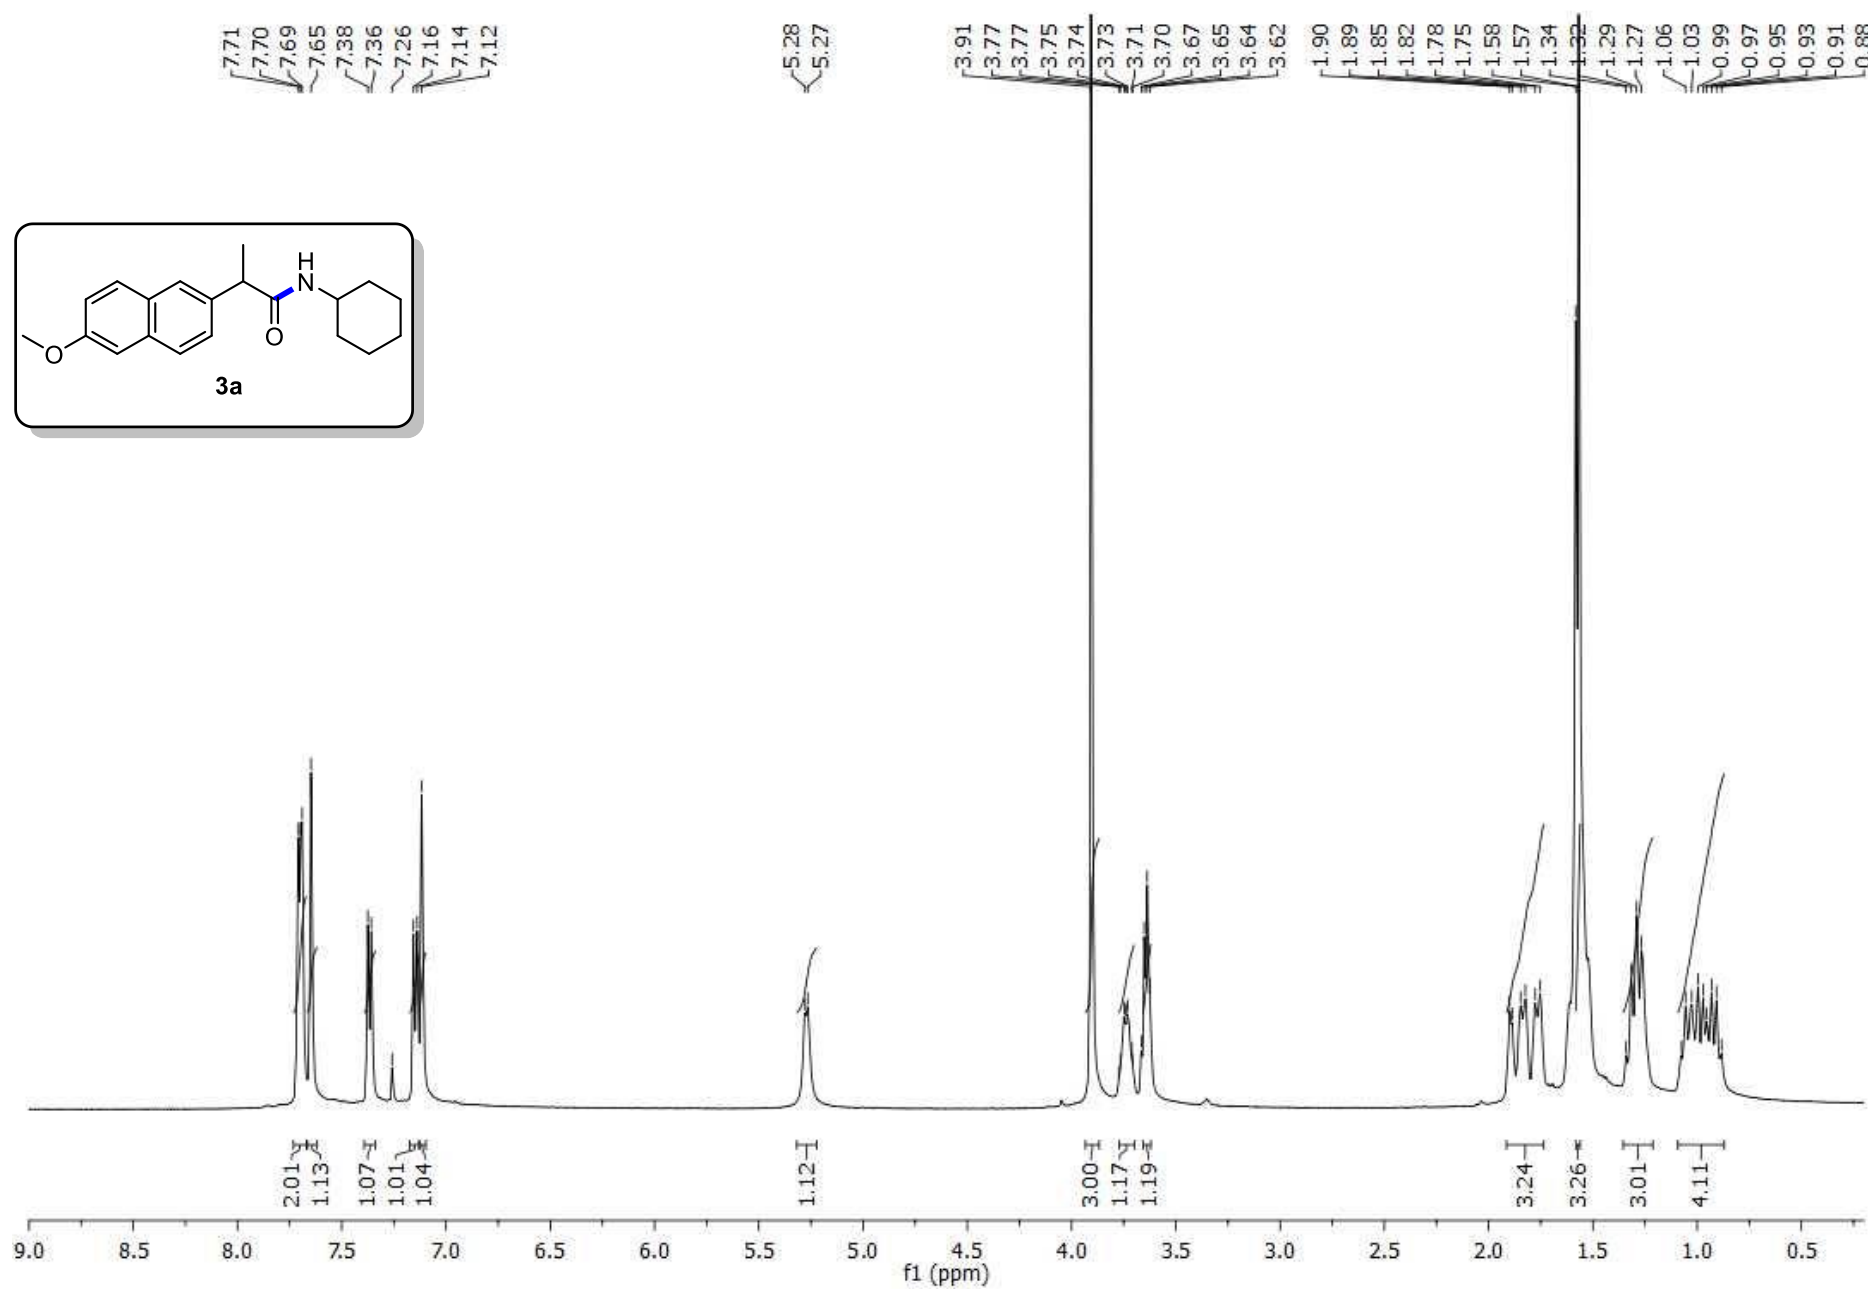

$^{13}\text{C}$  NMR ( $\text{CDCl}_3$ , 101 MHz) spectrum of *N*-Cyclohexyl-2-(6-methoxynaphthalen-2-yl)propanamide (**3a**)

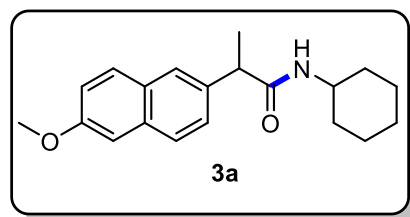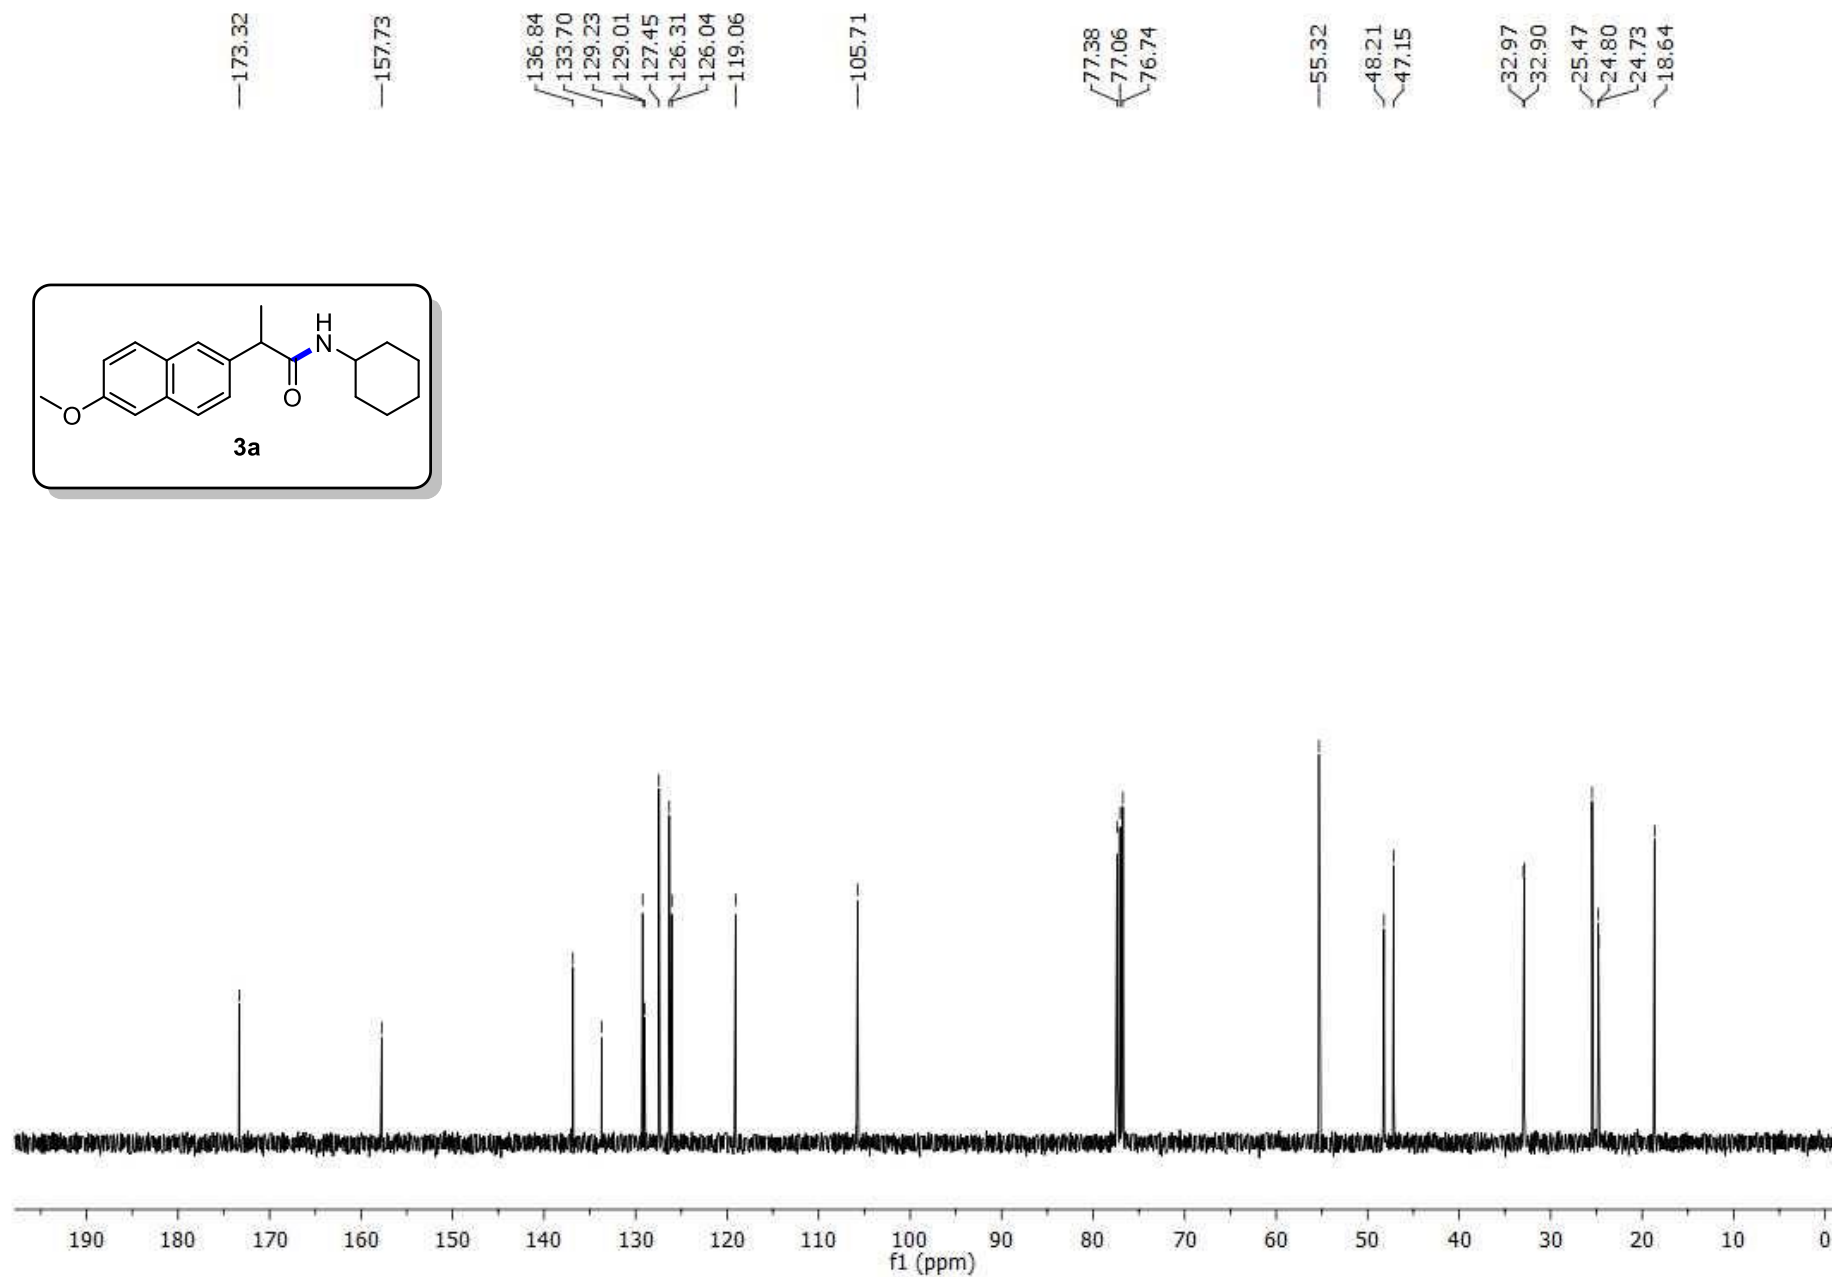

$^1\text{H}$  NMR ( $\text{CDCl}_3$ , 400 MHz) spectrum of *N*-Cyclohexyl-2-(*p*-tolyl)acetamide (**3b**)

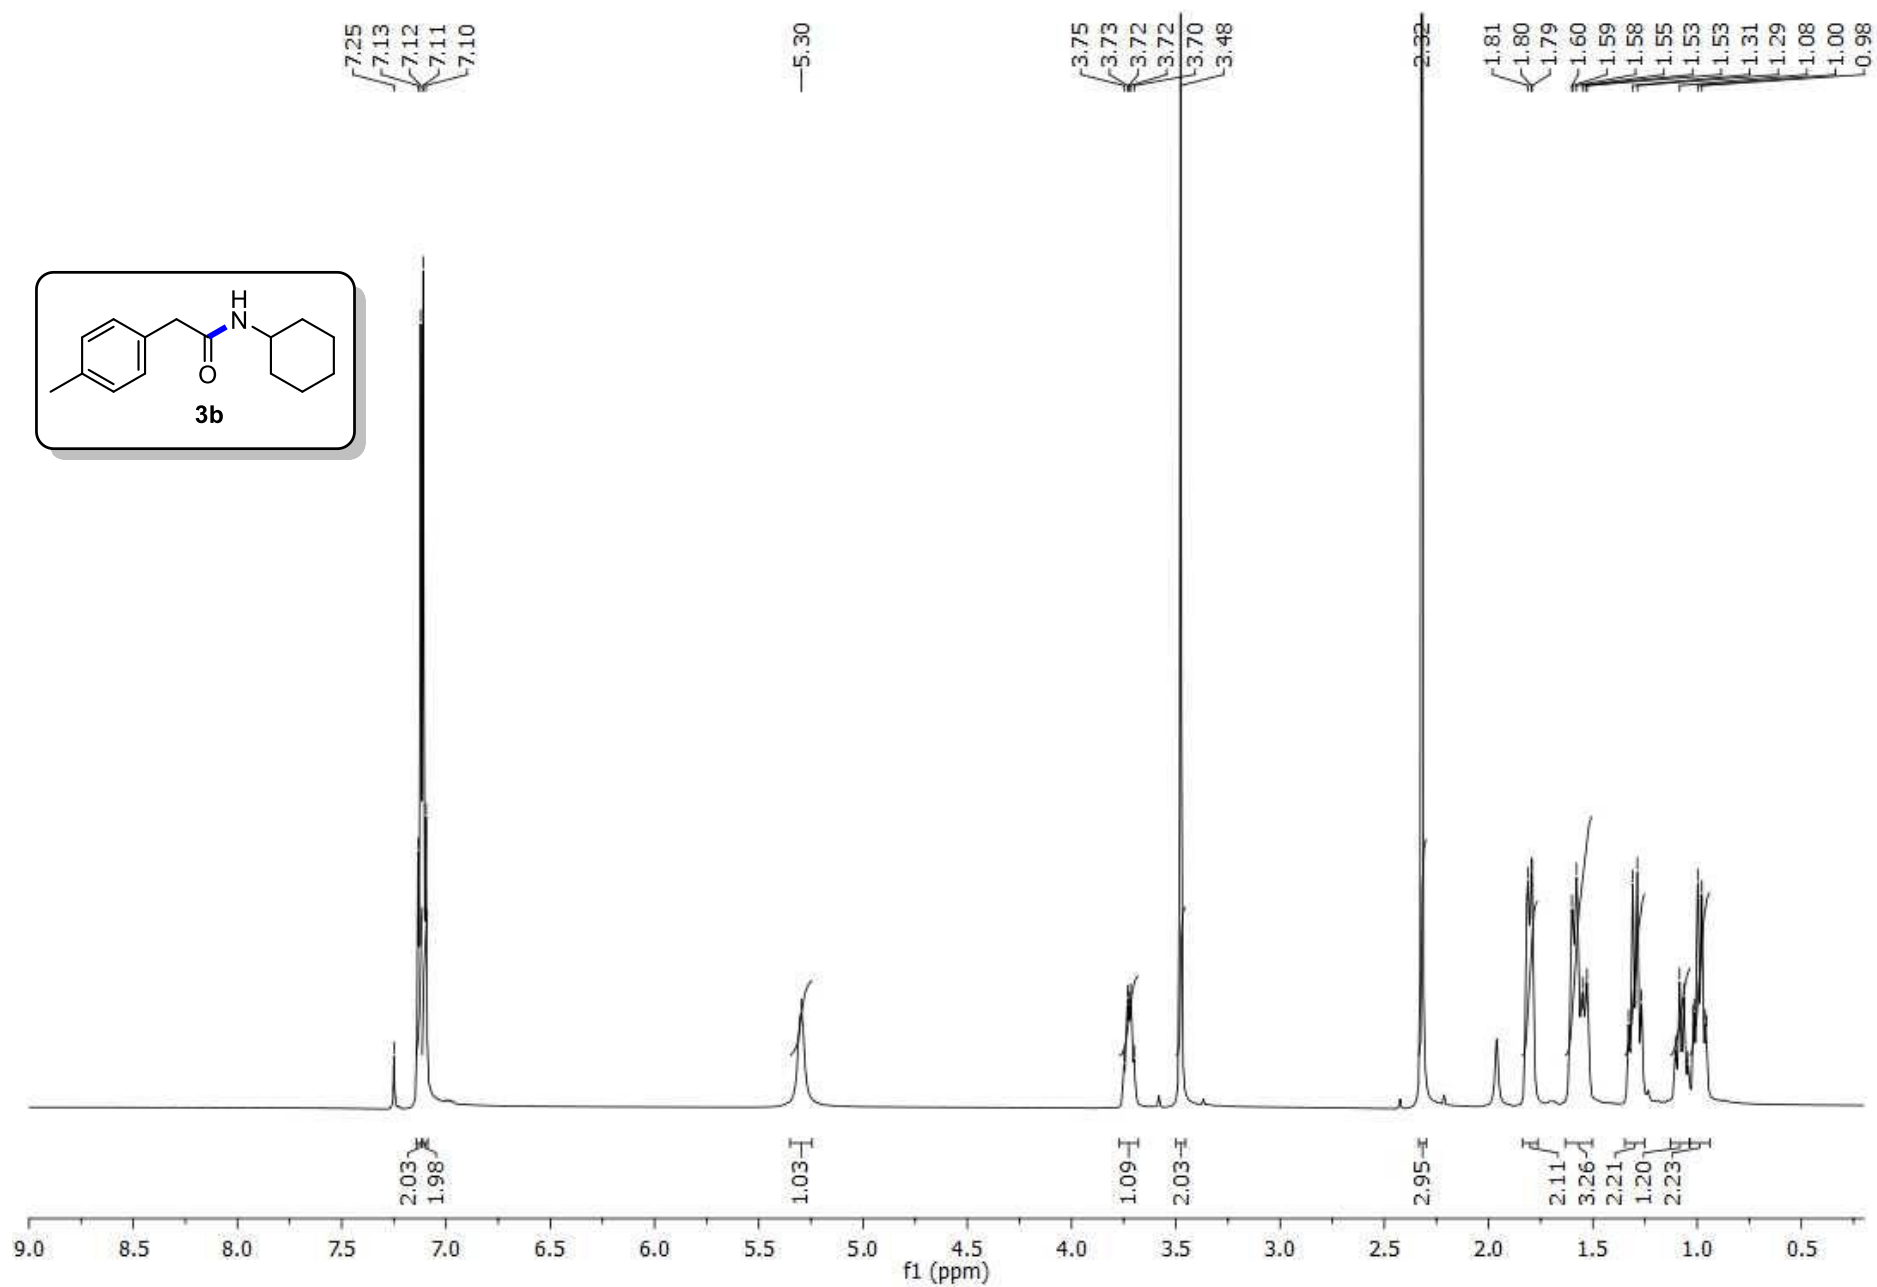



<sup>1</sup>H NMR (CDCl<sub>3</sub>, 400 MHz) spectrum of *N*-Cyclohexyl-2-phenylbutanamide (**3c**)

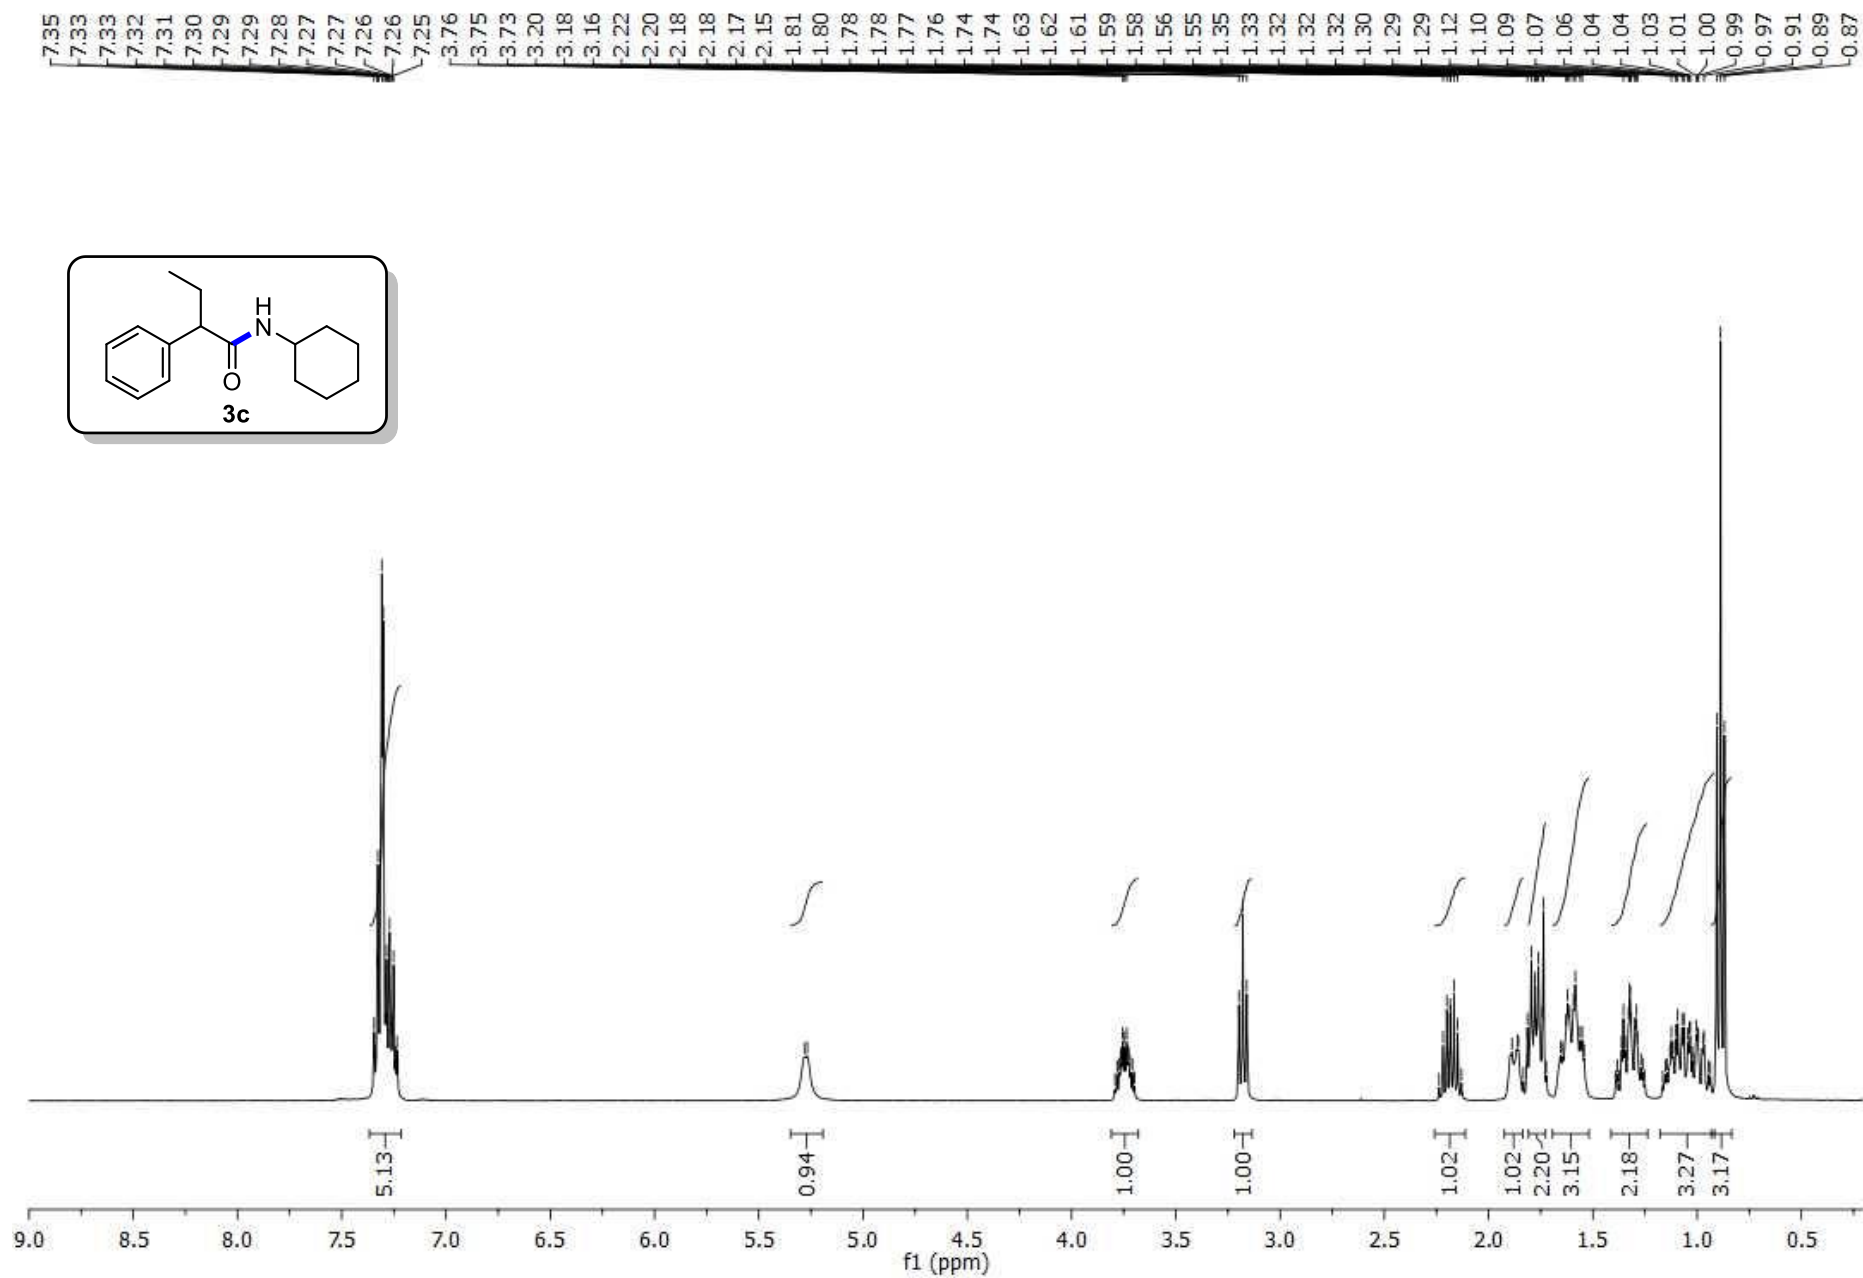

$^1\text{H}$  NMR ( $\text{CDCl}_3$ , 600 MHz) spectrum of *N*-Isopropyl-2-(6-methoxynaphthalen-2-yl)propanamide (**3d**)

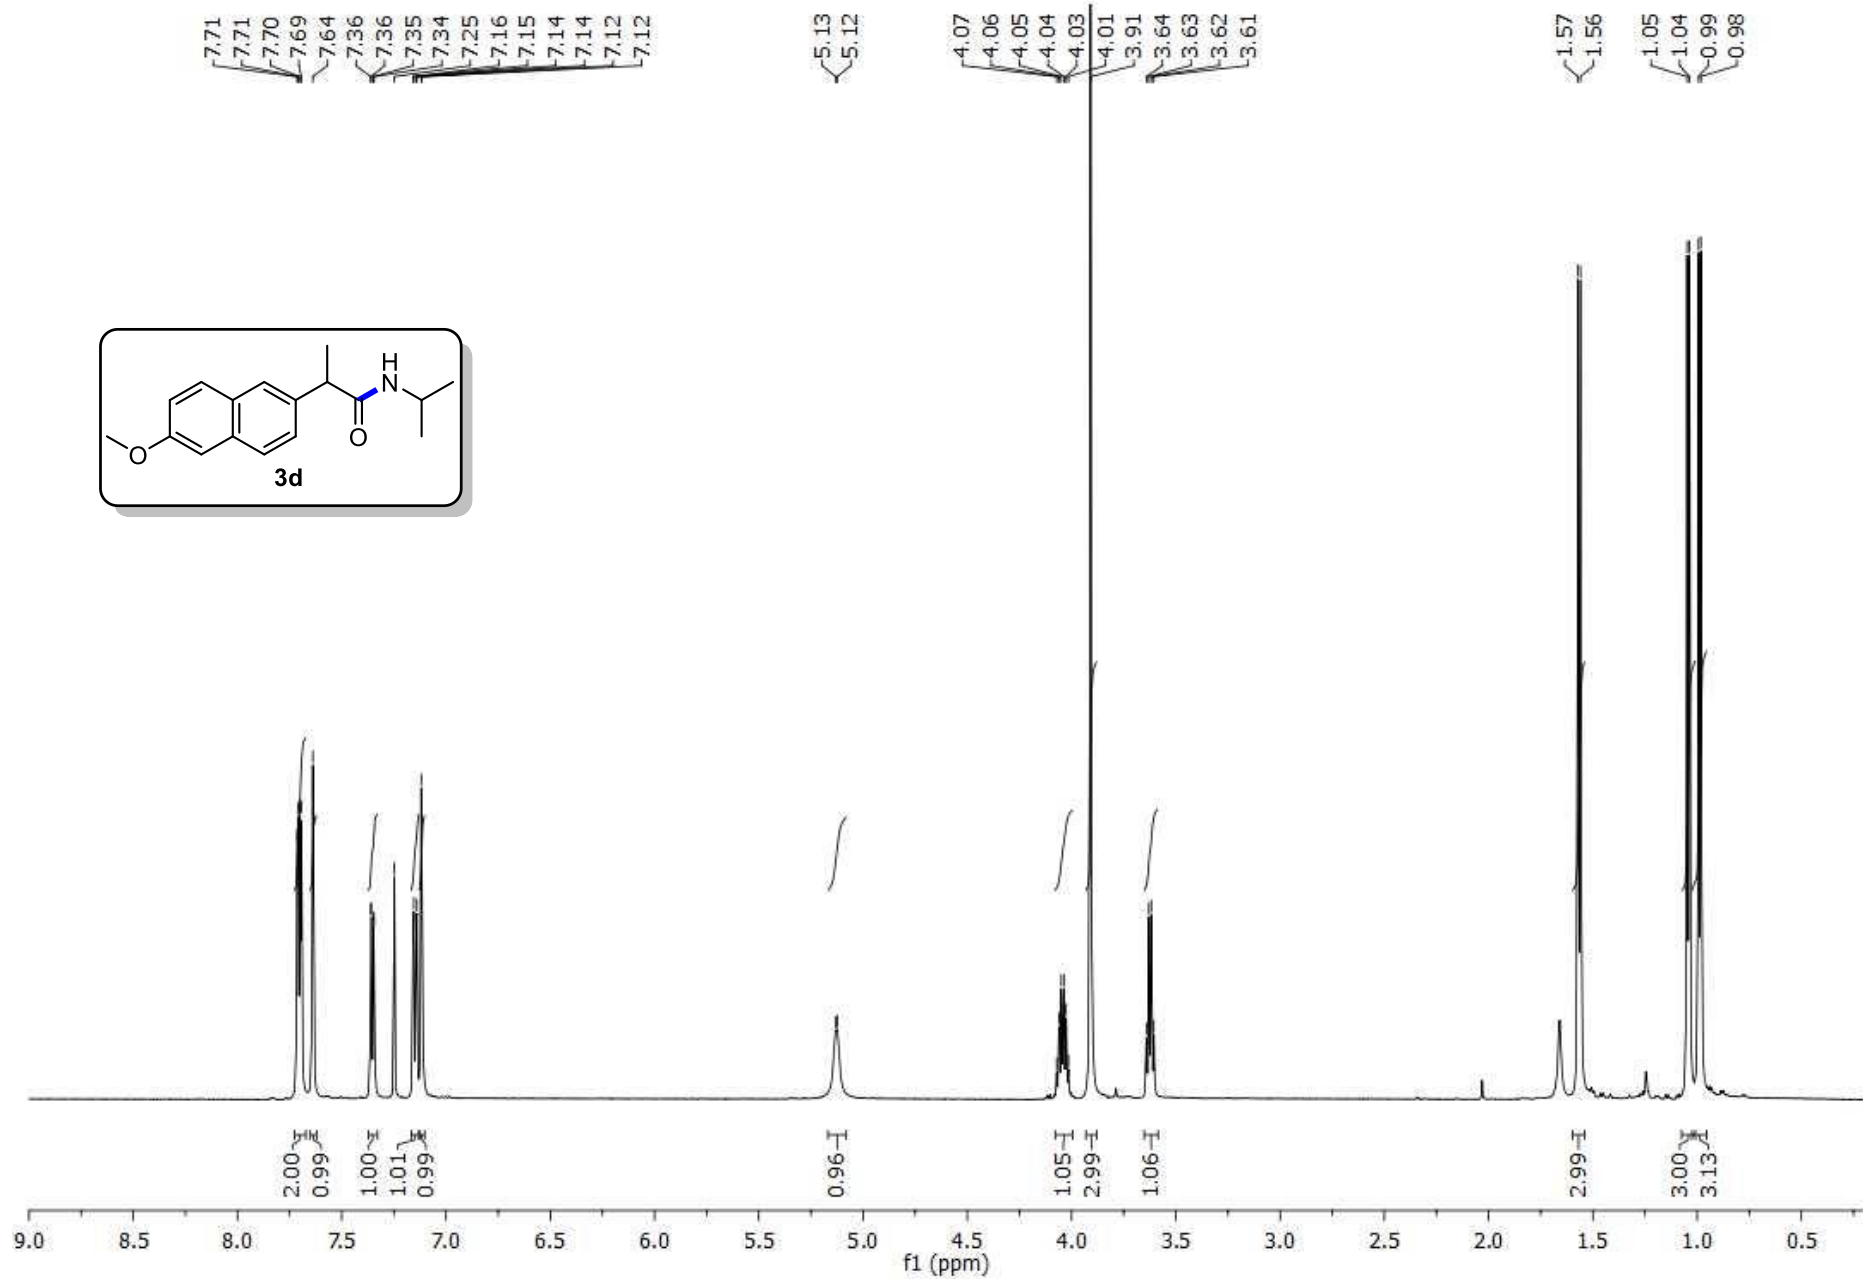

$^{13}\text{C}$  NMR (151 MHz,  $\text{CDCl}_3$ ) spectrum of *N*-Isopropyl-2-(6-methoxynaphthalen-2-yl)propanamide (**3d**)

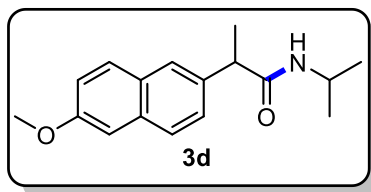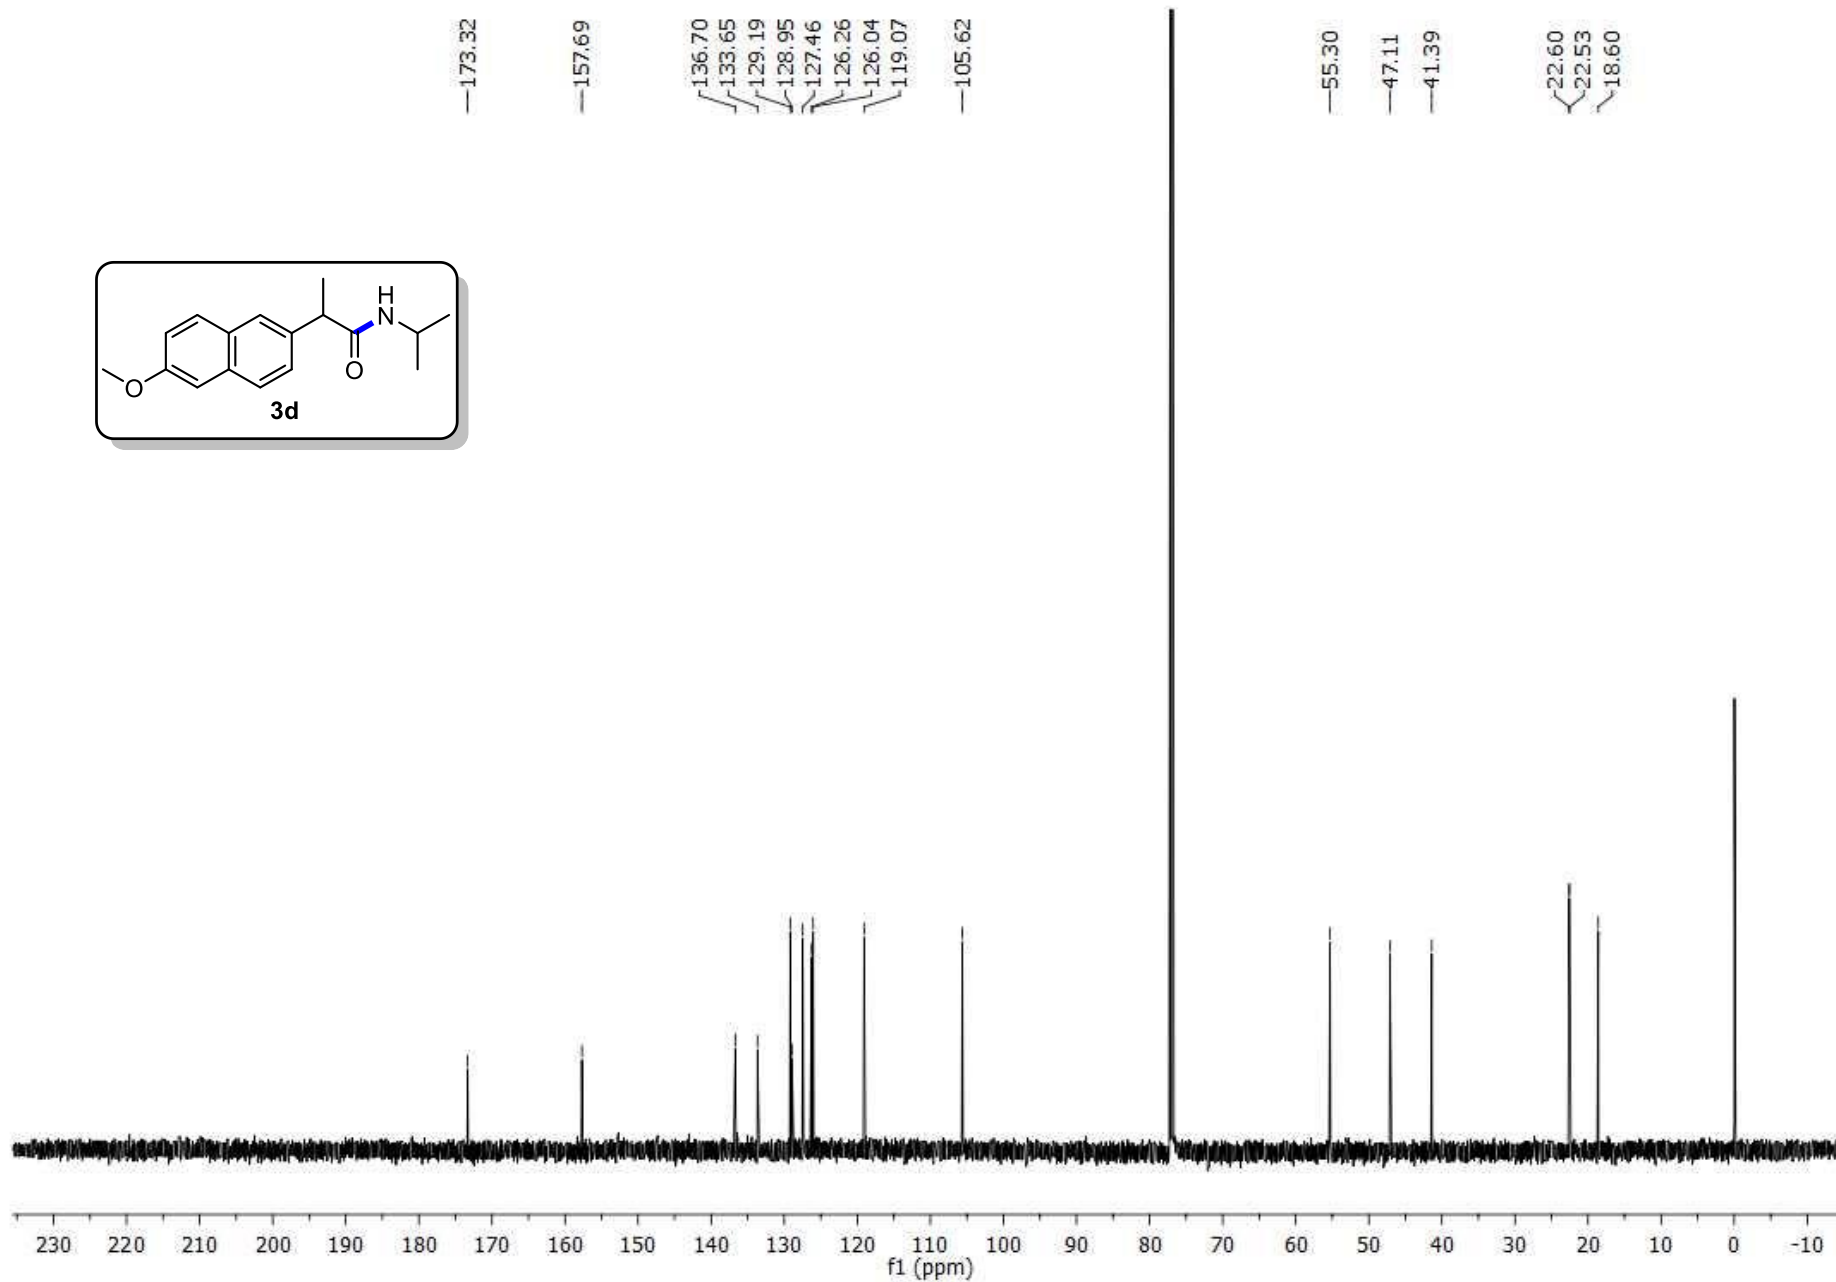

$^1\text{H}$  NMR ( $\text{CDCl}_3$ , 400 MHz) spectrum of *N*-Isopropyl-2-(*p*-tolyl)acetamide (**3e**)

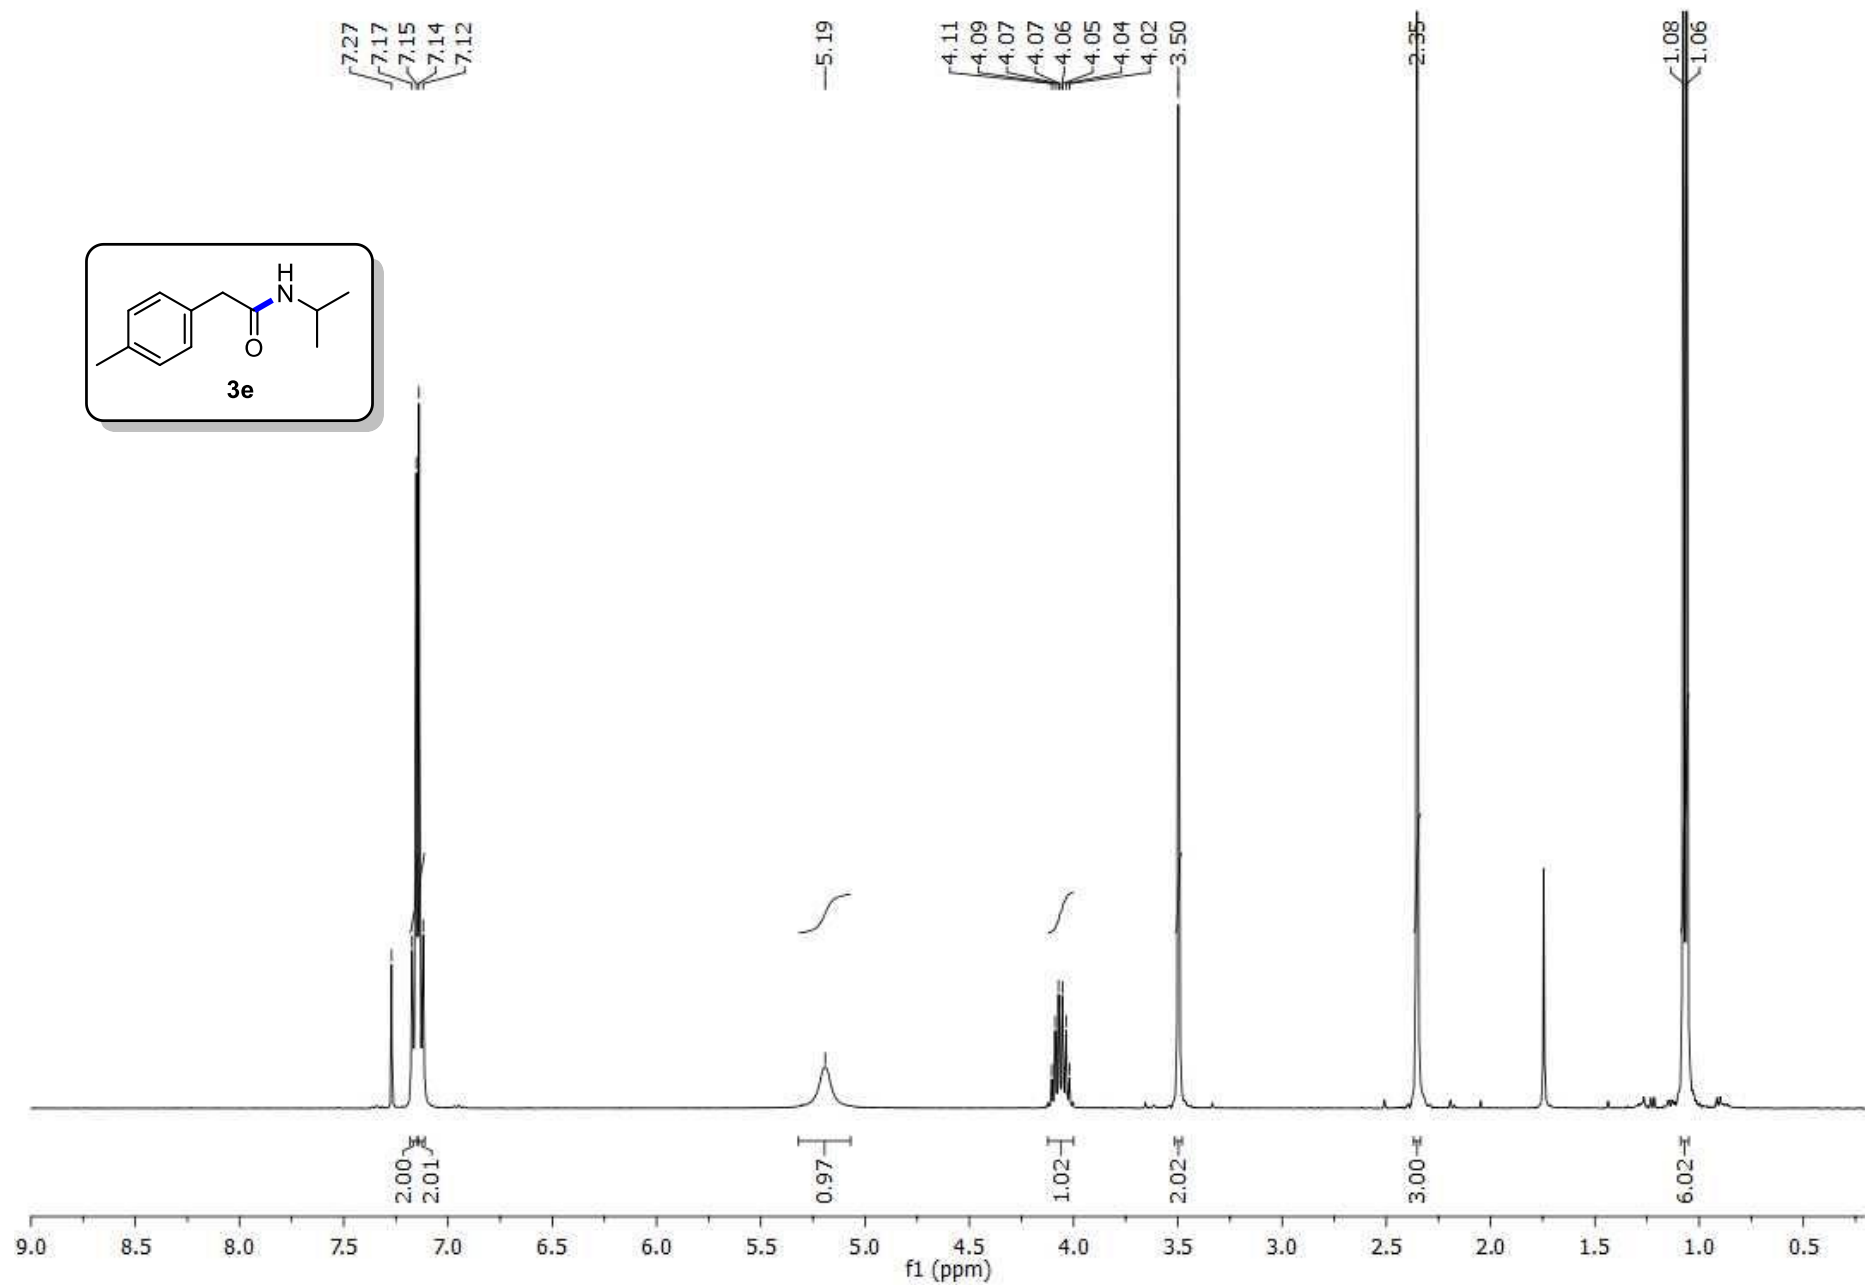

<sup>1</sup>H NMR (CDCl<sub>3</sub>, 400 MHz) spectrum of *N*-Isopropyl-2-phenylbutanamide (**3f**)

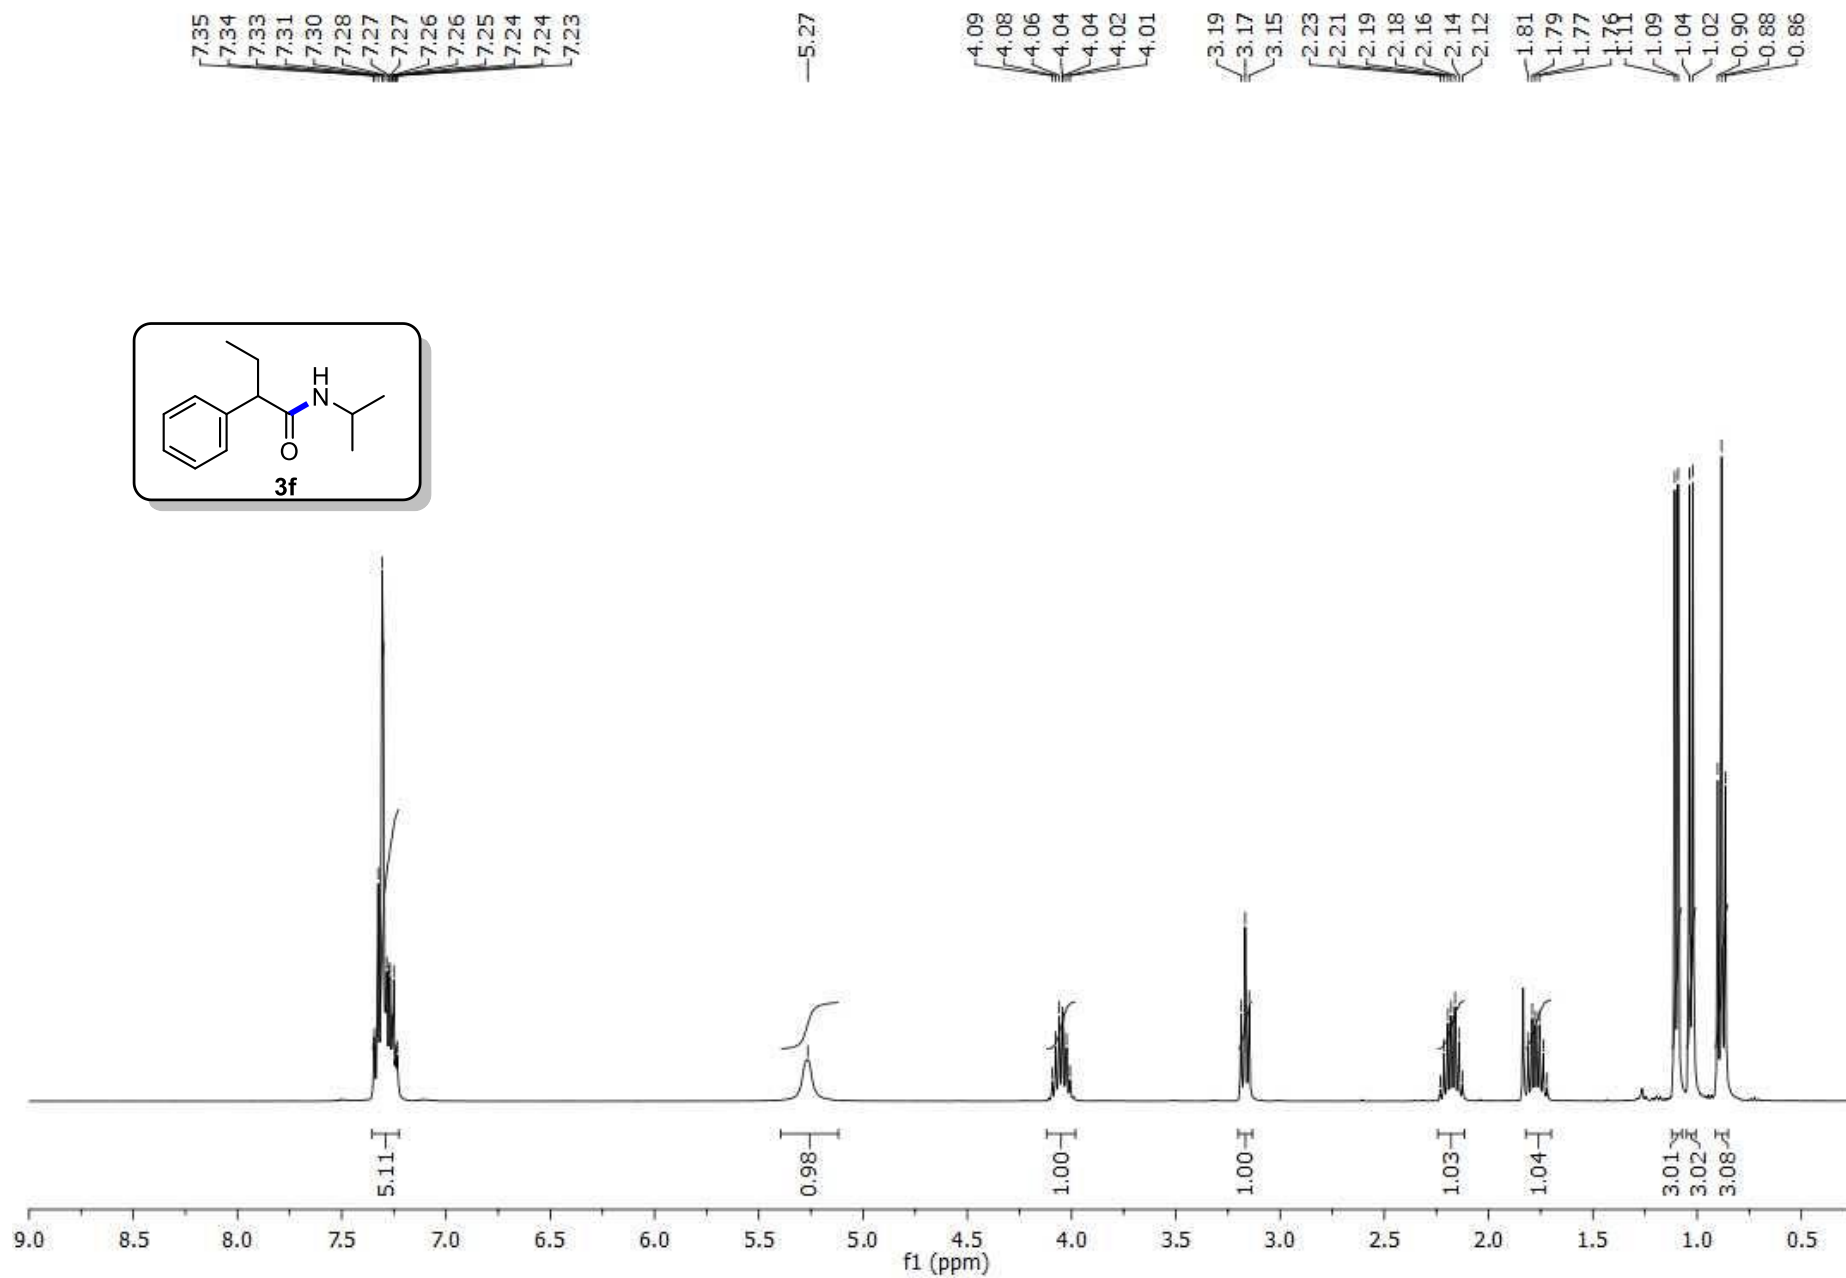

$^1\text{H}$  NMR ( $\text{CDCl}_3$ , 400 MHz) spectrum of 2-(3-Benzoylphenyl)-*N*-cyclohexylpropanamide (**3g**)

7.80  
7.78  
7.73  
7.68  
7.66  
7.62  
7.60  
7.59  
7.58  
7.58  
7.57  
7.50  
7.48  
7.47  
7.45  
7.43  
7.27  
5.32  
5.31  
3.75  
3.74  
3.73  
3.58  
3.56  
3.54  
1.89  
1.86  
1.82  
1.79  
1.67  
1.66  
1.65  
1.64  
1.63  
1.60  
1.60  
1.57  
1.56  
1.55  
1.53  
1.52  
1.43  
1.36  
1.35  
1.34  
1.33  
1.32  
1.31  
1.30  
1.29  
1.28  
1.27  
1.13  
1.13  
1.12  
1.10  
1.10  
1.08  
1.07  
1.06  
1.05  
1.02  
0.99  
0.98

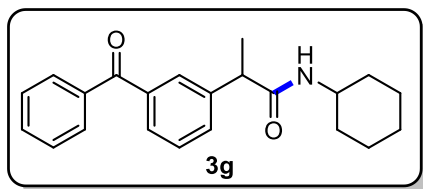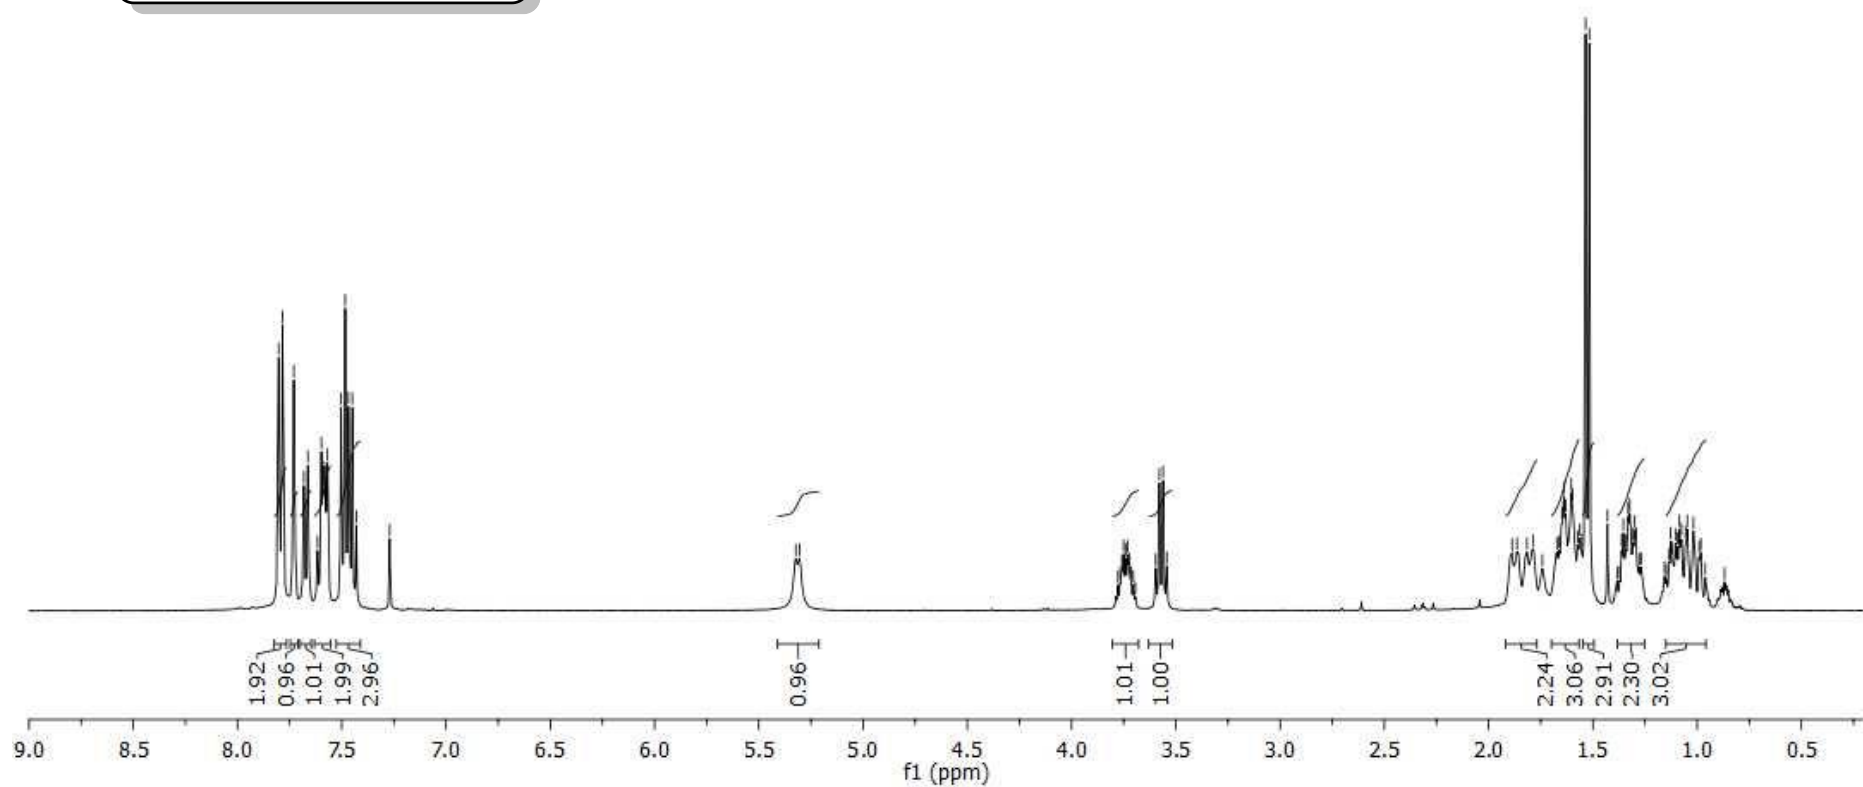

<sup>1</sup>H NMR (CDCl<sub>3</sub>, 400 MHz) spectrum of *N*-Cyclohexyl-2-(4-isobutylphenyl)propanamide (**3h**)

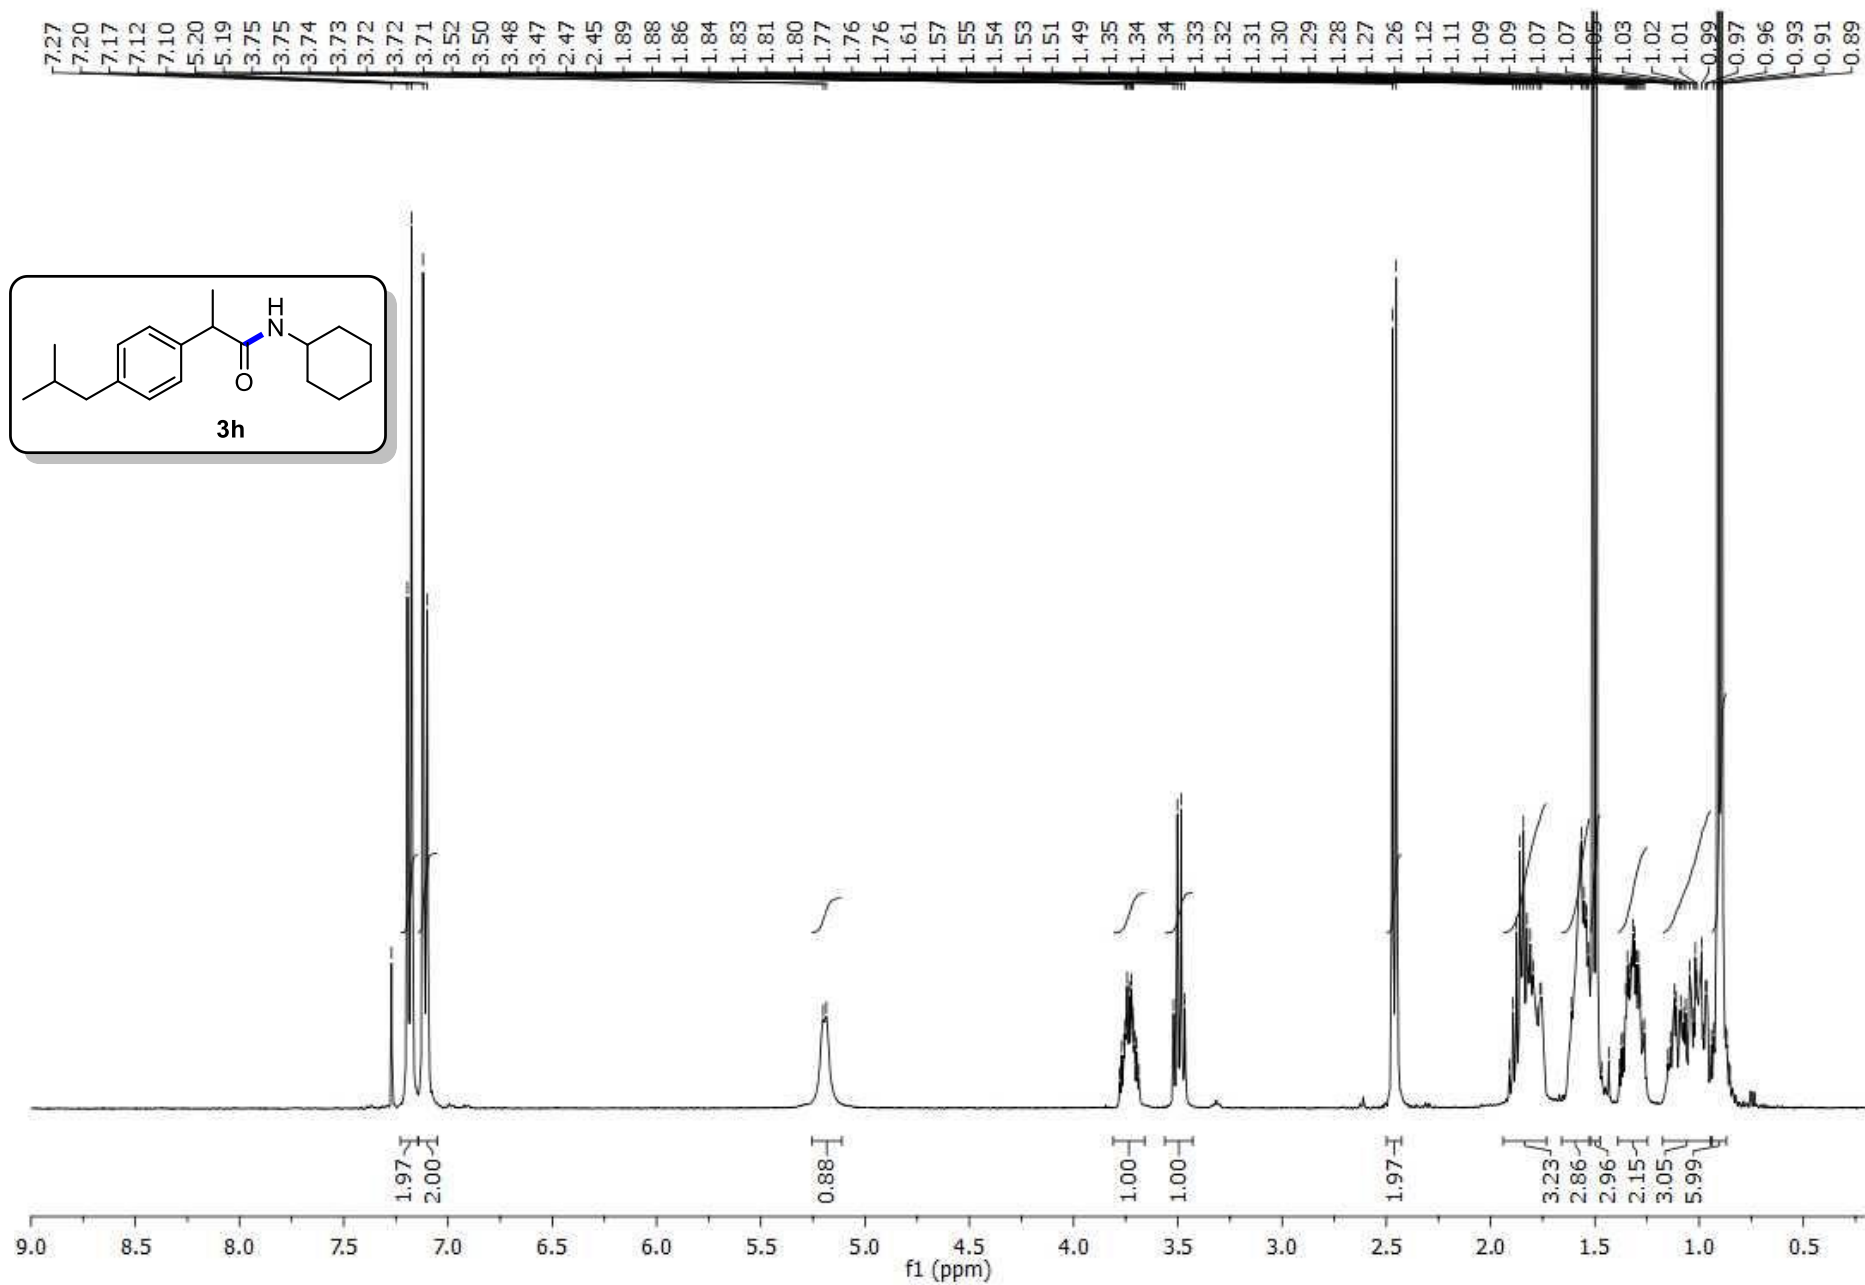

$^{13}\text{C}$  NMR ( $\text{CDCl}_3$ , 101 MHz) spectrum of *N*-Cyclohexyl-2-(4-isobutylphenyl)propanamide (**3h**)

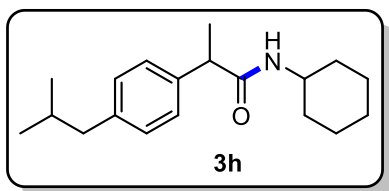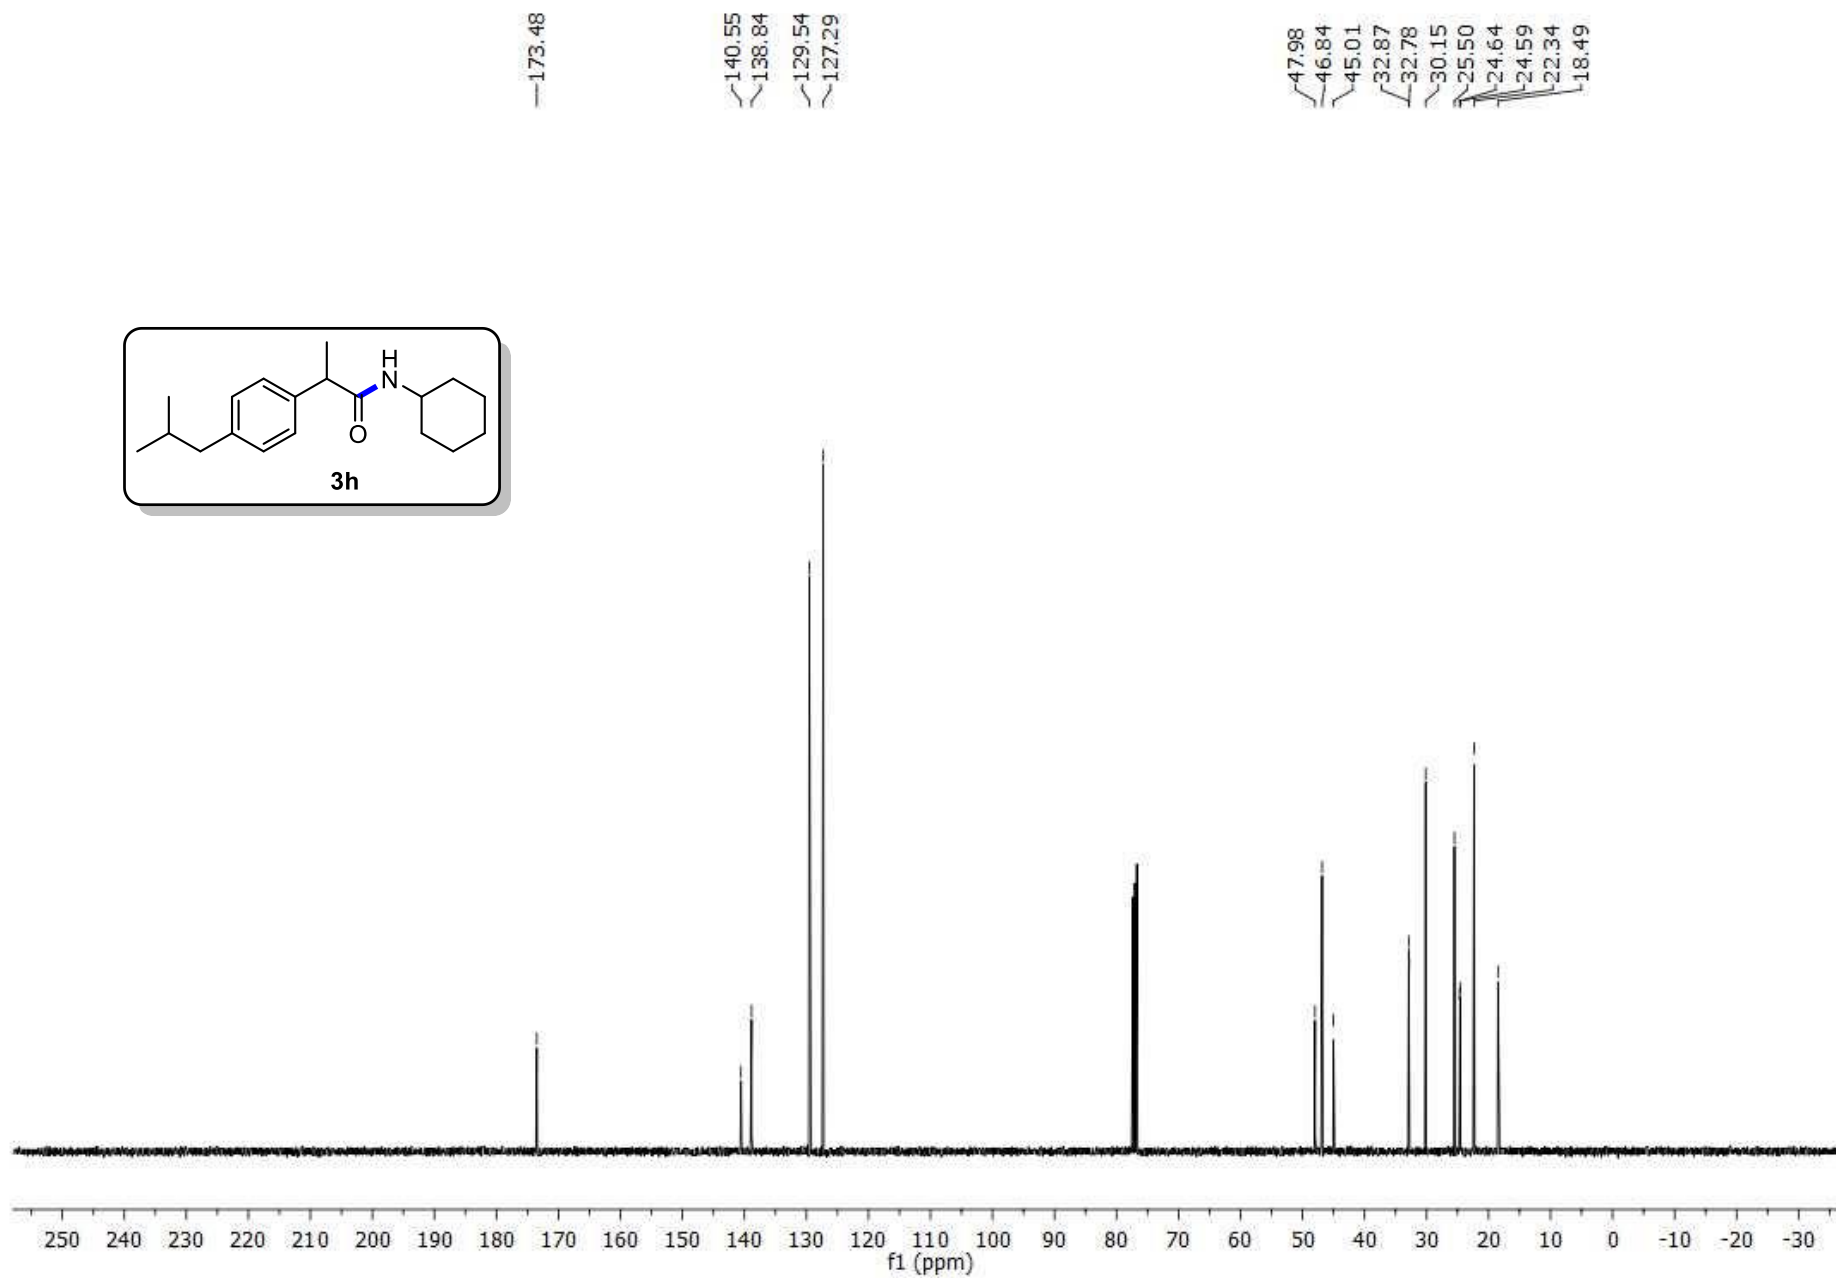



<sup>1</sup>H NMR (CDCl<sub>3</sub>, 400 MHz) spectrum of *N*-Cyclohexyl-2,2-diphenylacetamide (**3i**)

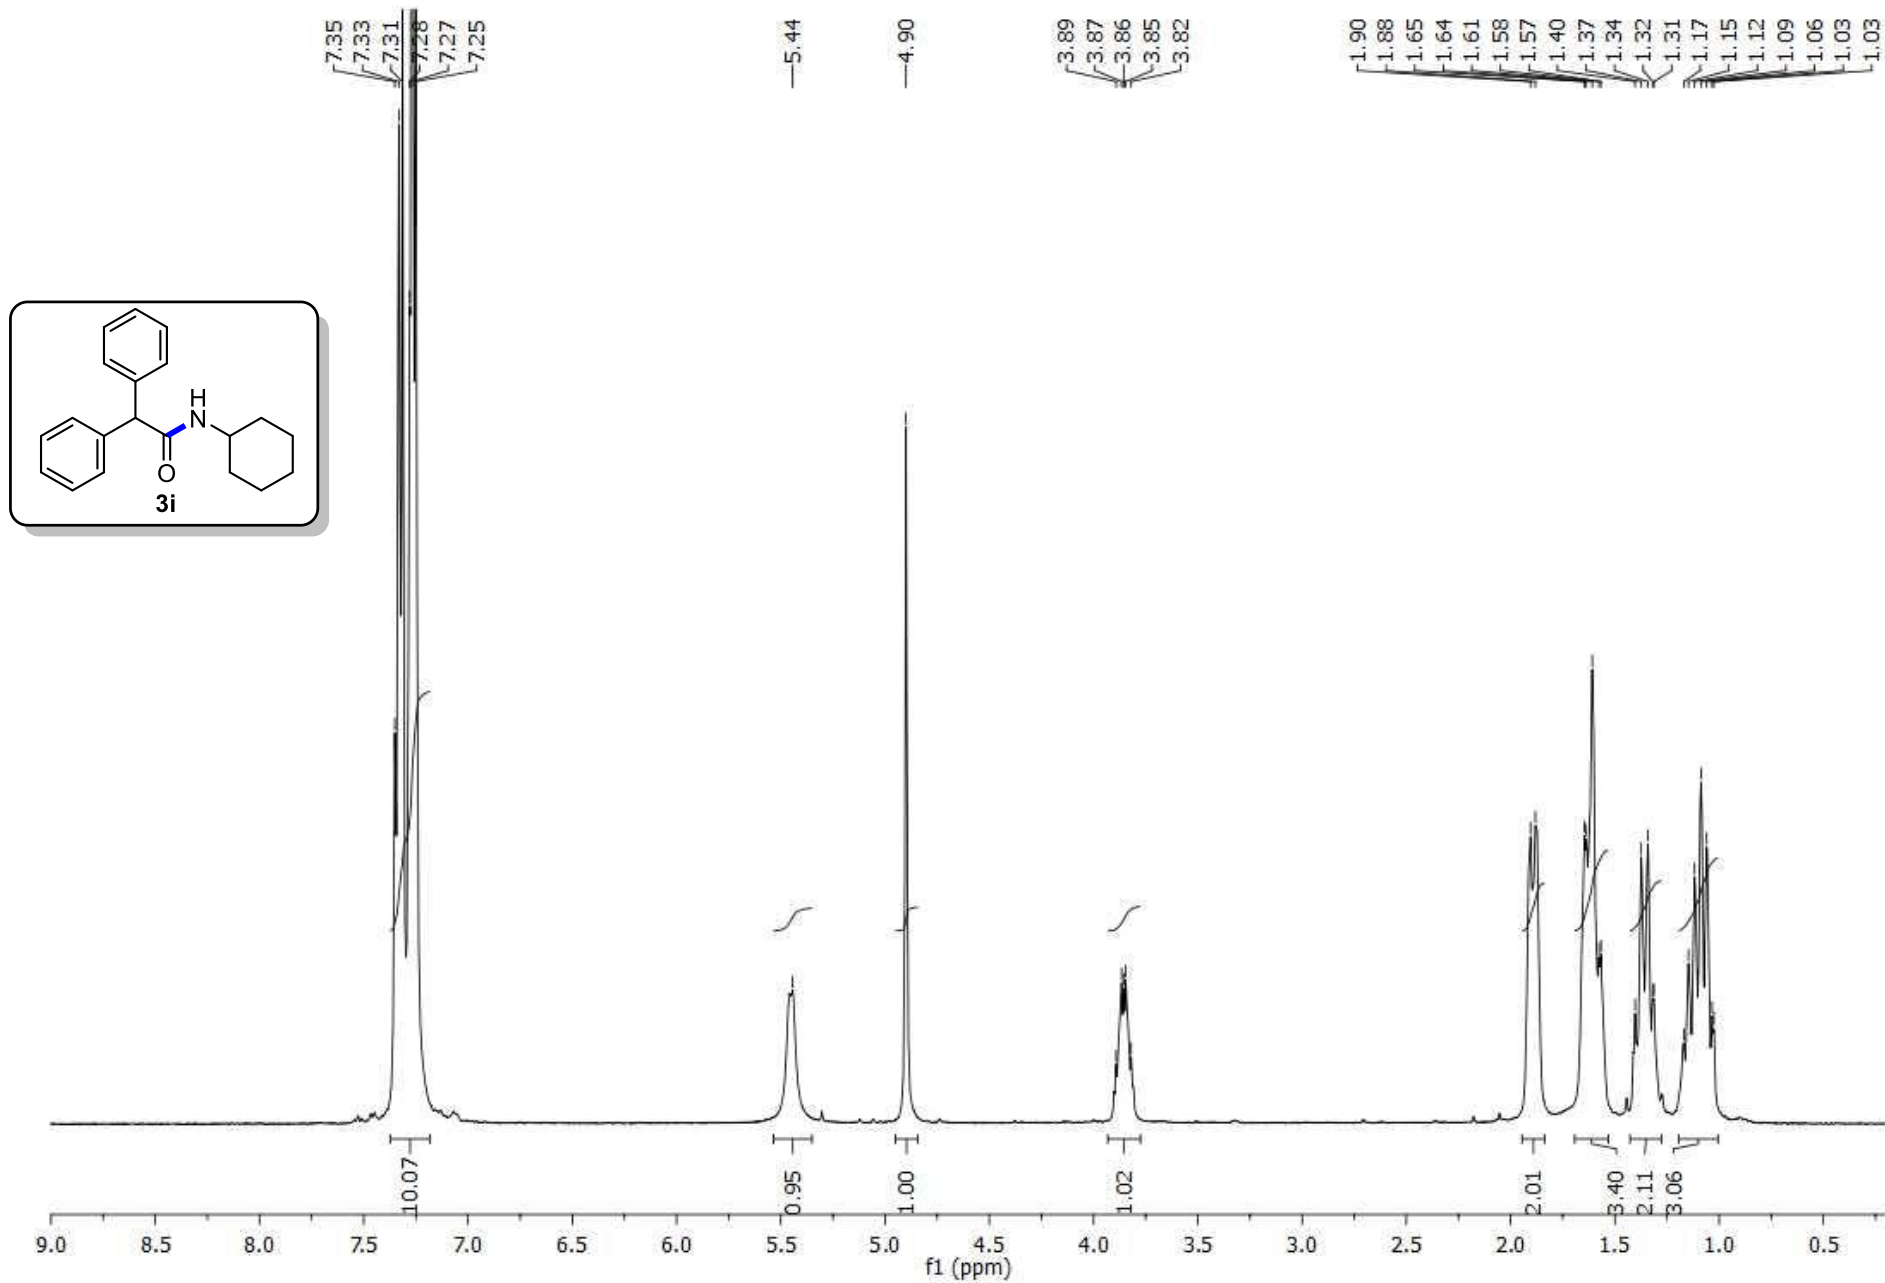

$^1\text{H}$  NMR ( $\text{CDCl}_3$ , 400 MHz) spectrum of 2-(3-Benzoylphenyl)-*N*-isopropylpropanamide (**3j**)

7.80  
7.78  
7.78  
7.73  
7.68  
7.66  
7.61  
7.59  
7.57  
7.57  
7.57  
7.50  
7.48  
7.47  
7.46  
7.45  
7.43  
7.27

5.33  
5.31

4.09  
4.08  
4.06  
4.04  
4.02  
4.01  
3.58  
3.57  
3.55  
3.53

1.53  
1.51  
1.12  
1.10  
1.06  
1.04

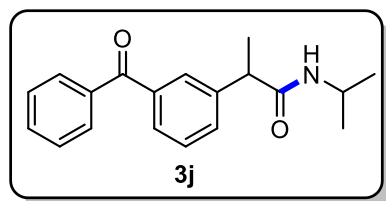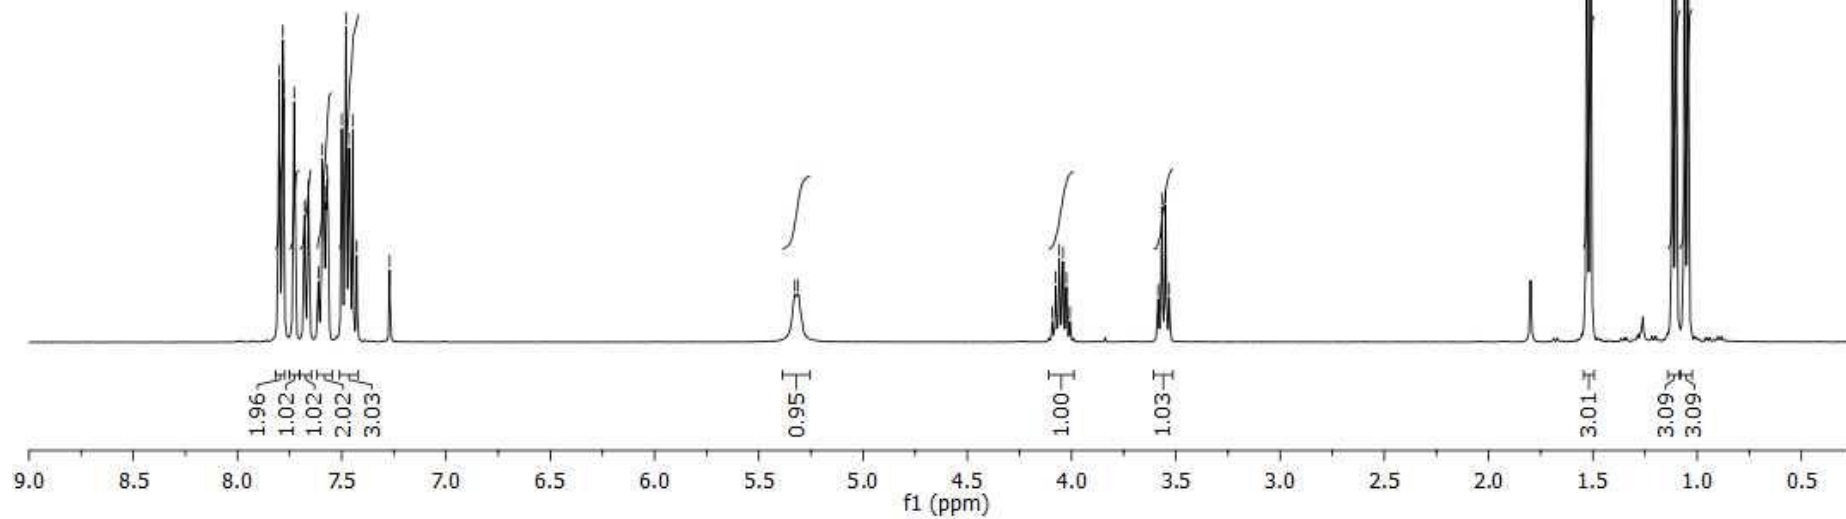

$^1\text{H}$  NMR ( $\text{CDCl}_3$ , 600 MHz) spectrum of 2-(4-Isobutylphenyl)-*N*-isopropylpropanamide (**3k**)

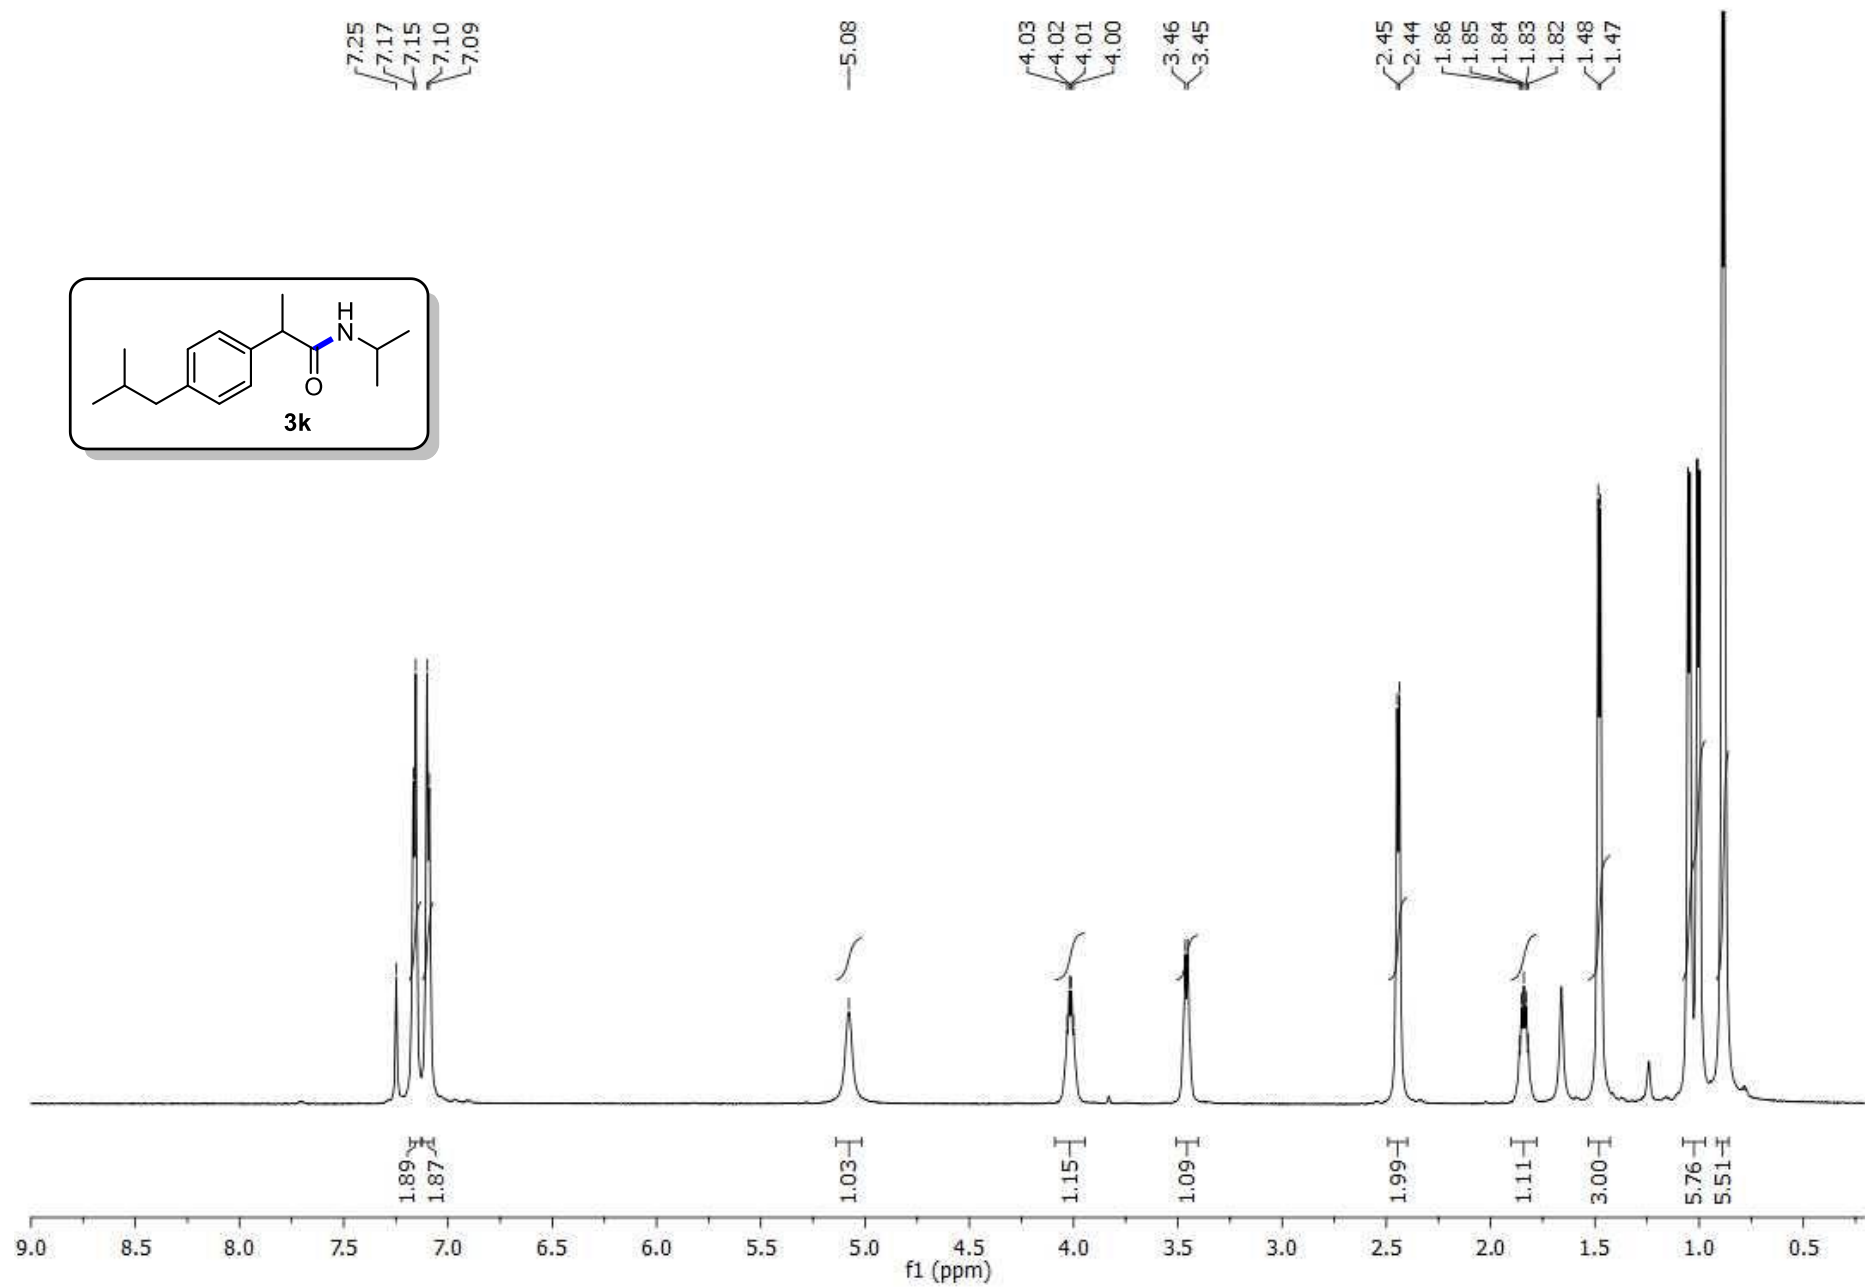

$^1\text{H}$  NMR ( $\text{CDCl}_3$ , 400 MHz) spectrum of *N*-Isopropyl-2,2-diphenylacetamide (**31**)

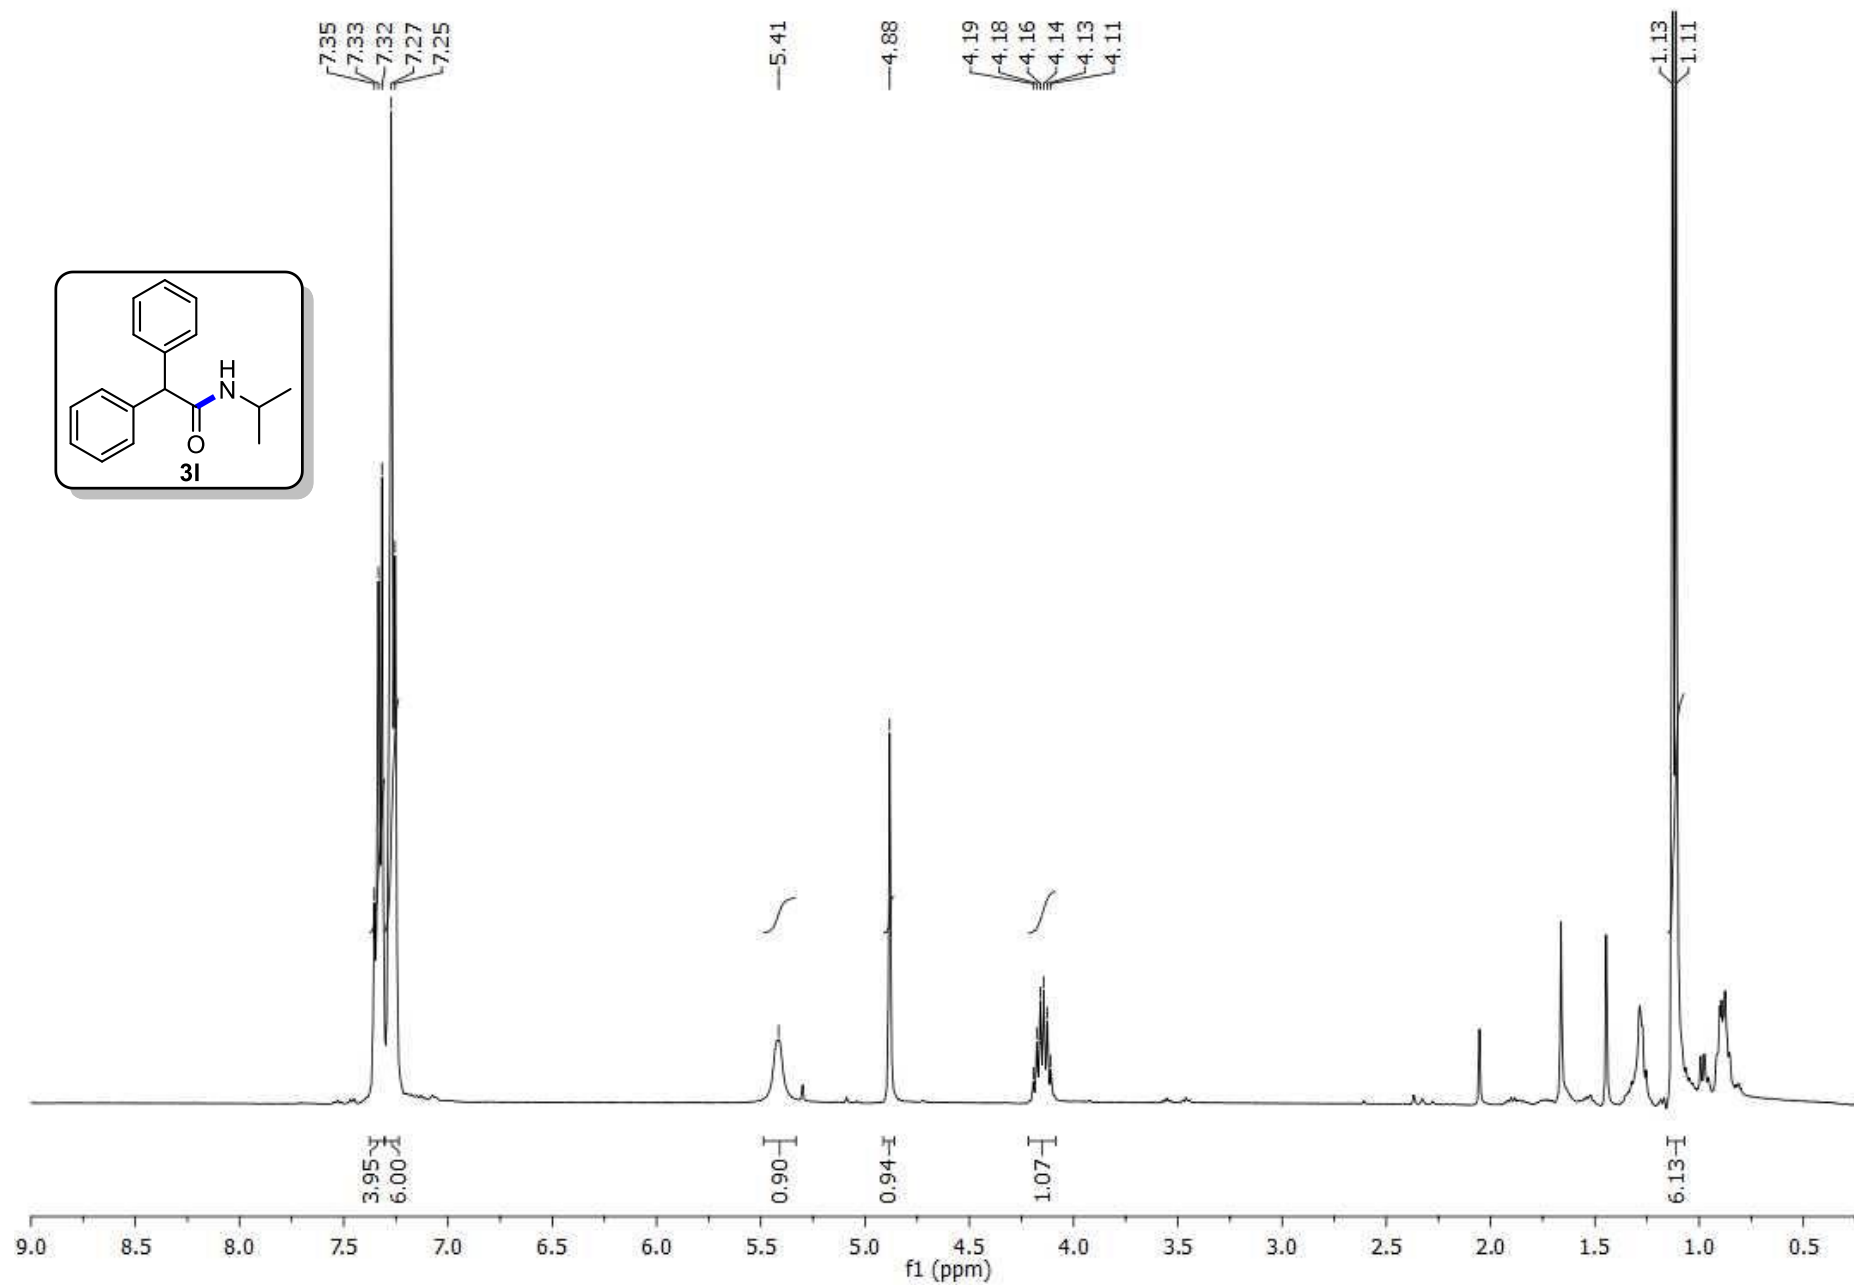

$^1\text{H}$  NMR ( $\text{CDCl}_3$ , 400 MHz) spectrum of *N*-Cyclohexylpivalamide (**3m**)

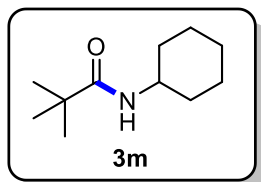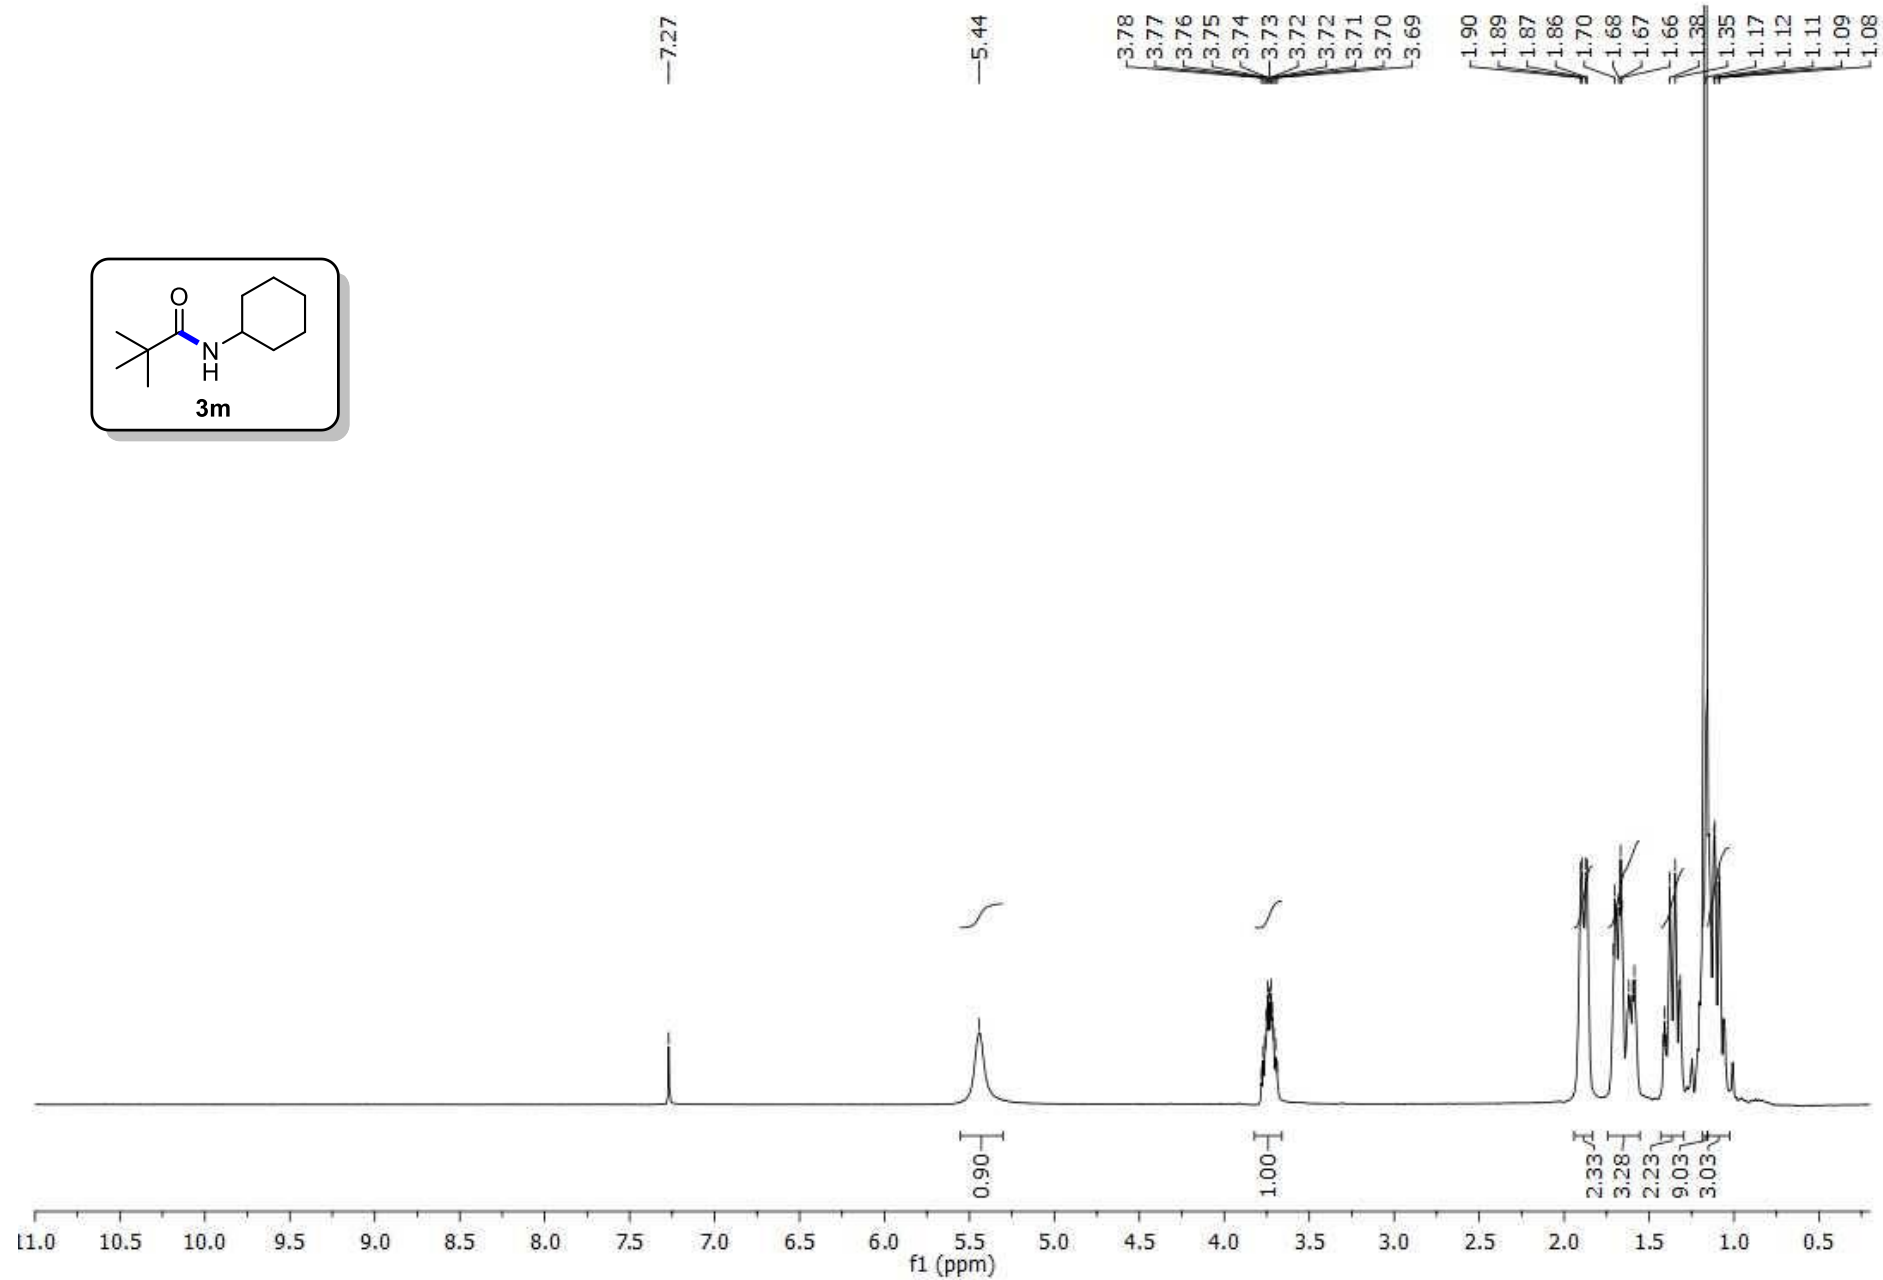

$^1\text{H}$  NMR ( $\text{CDCl}_3$ , 400 MHz) spectrum of *N*-Isopropylpivalamide (**3n**)

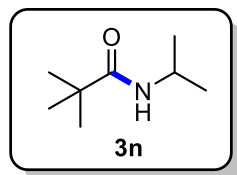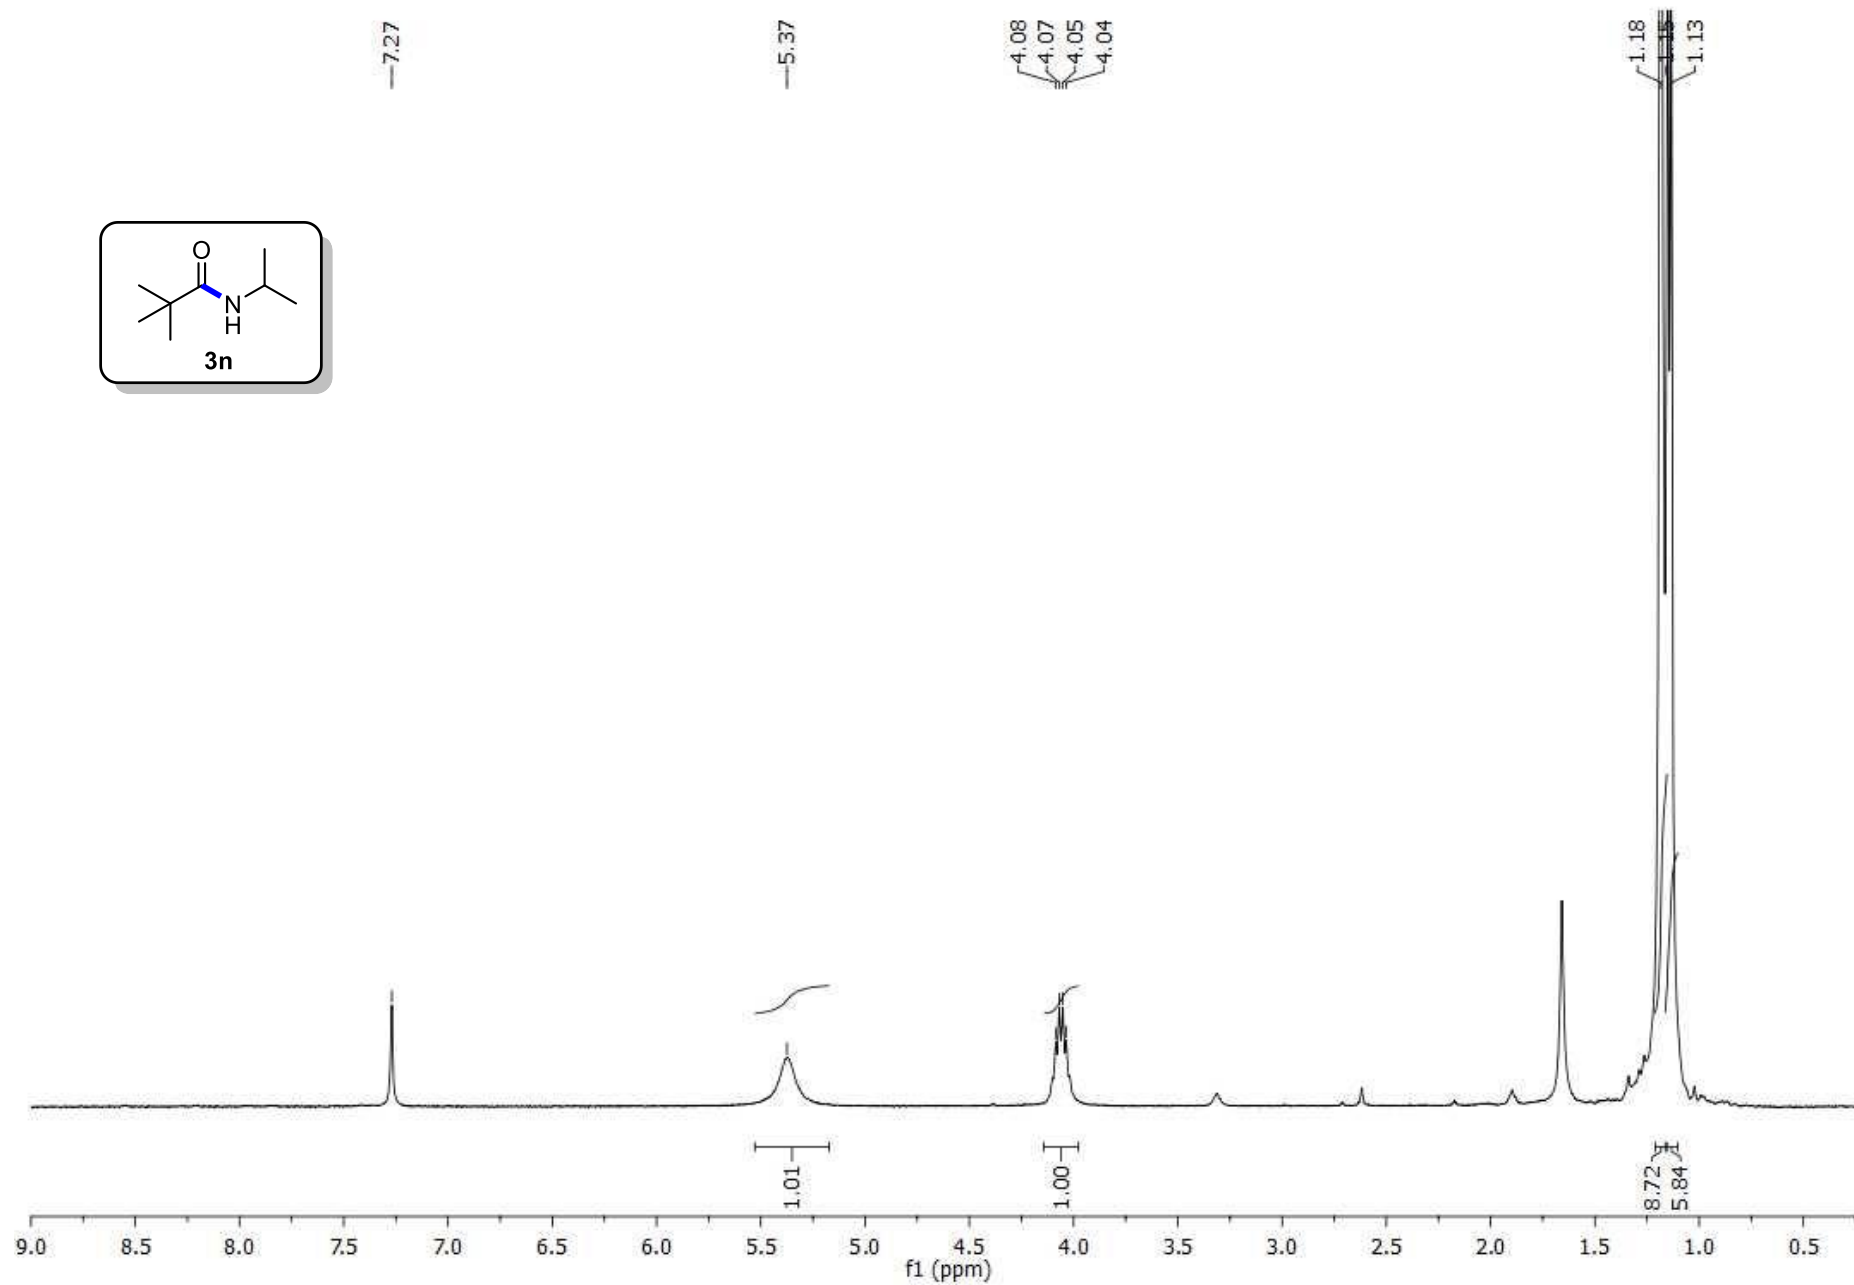

$^1\text{H}$  NMR ( $\text{CDCl}_3$ , 400 MHz) spectrum of *N*-Cyclohexylcinnamamide (**3o**)

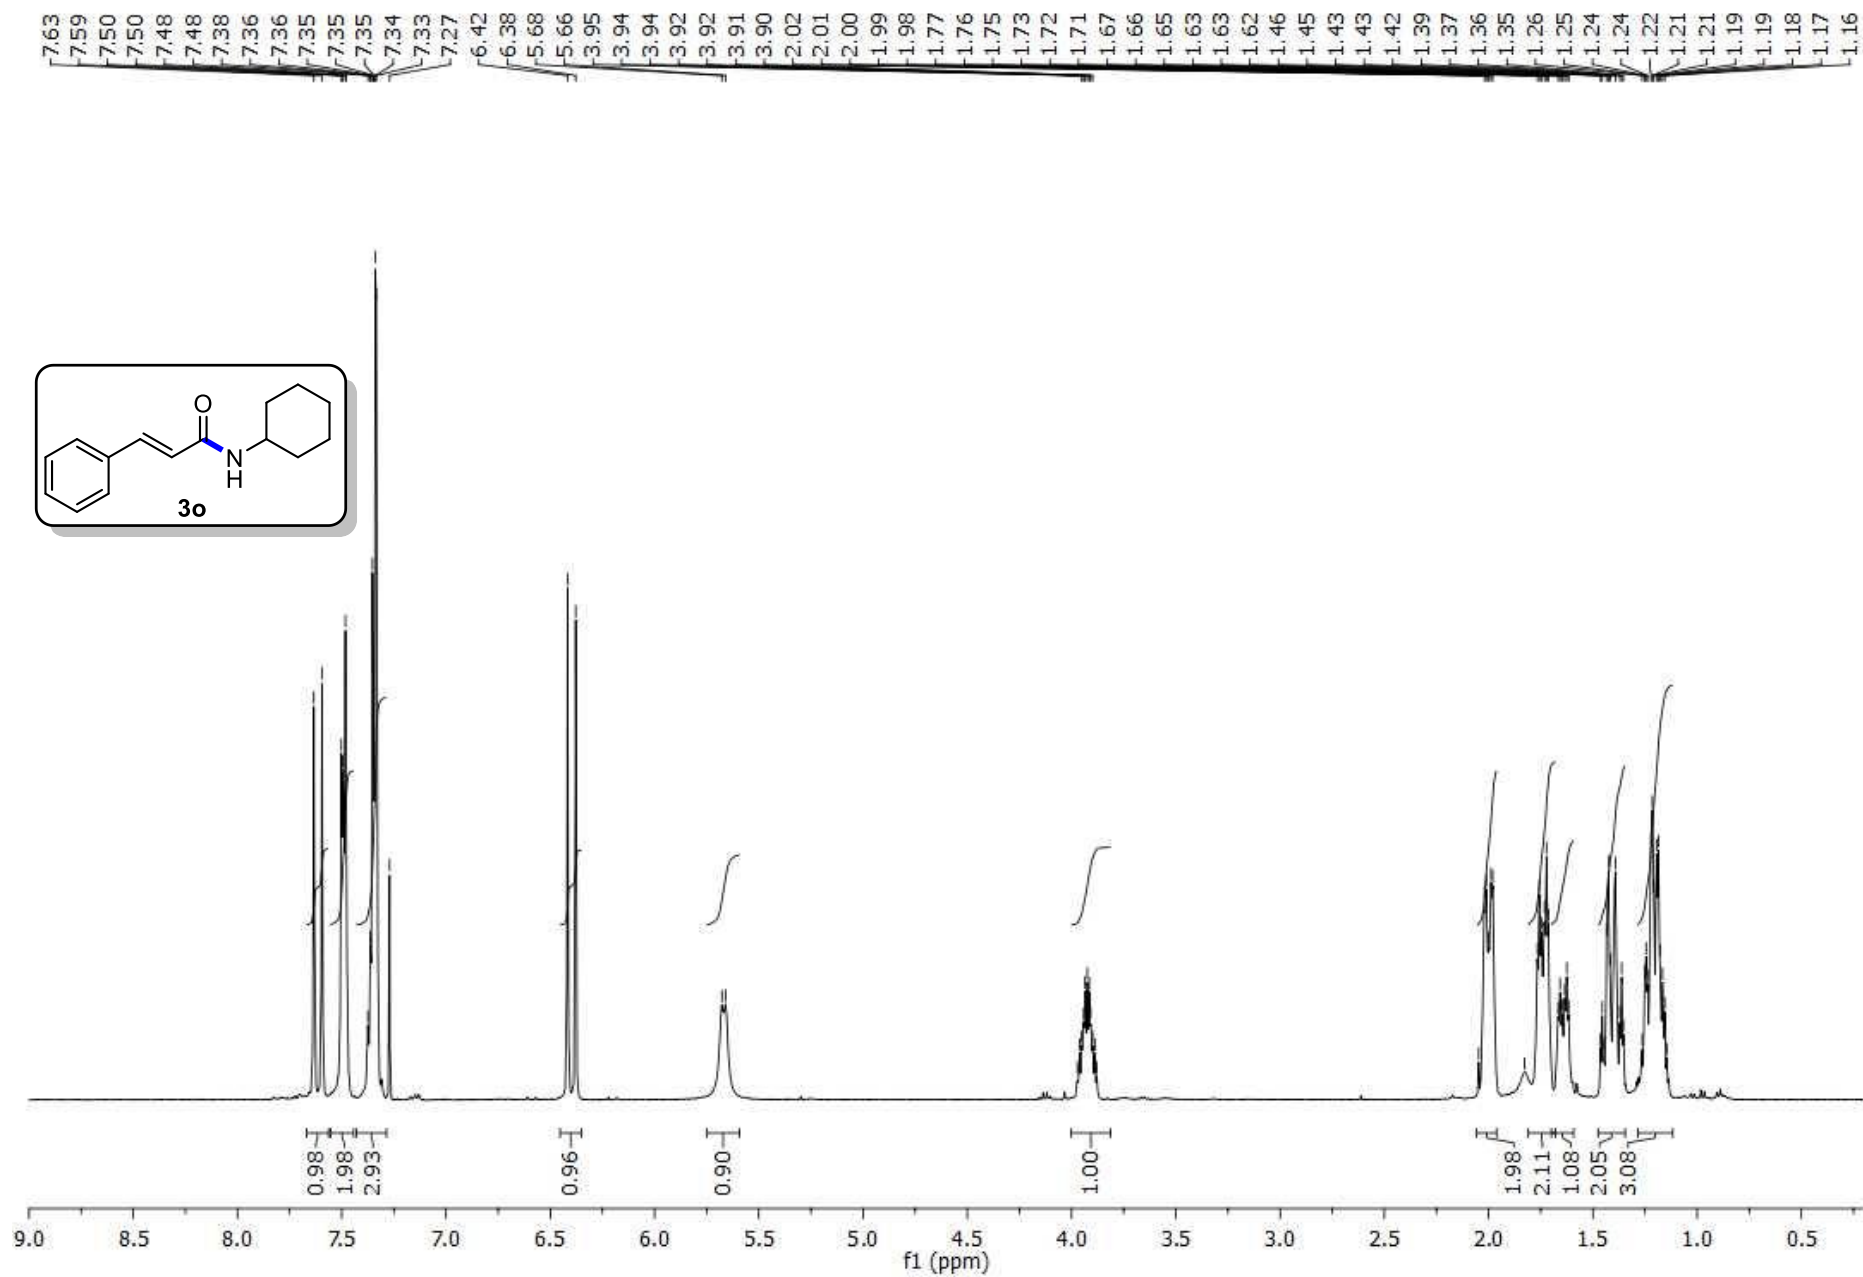

$^1\text{H}$  NMR ( $\text{CDCl}_3$ , 400 MHz) spectrum of *N*-Isopropylcinnamamide (**3p**)

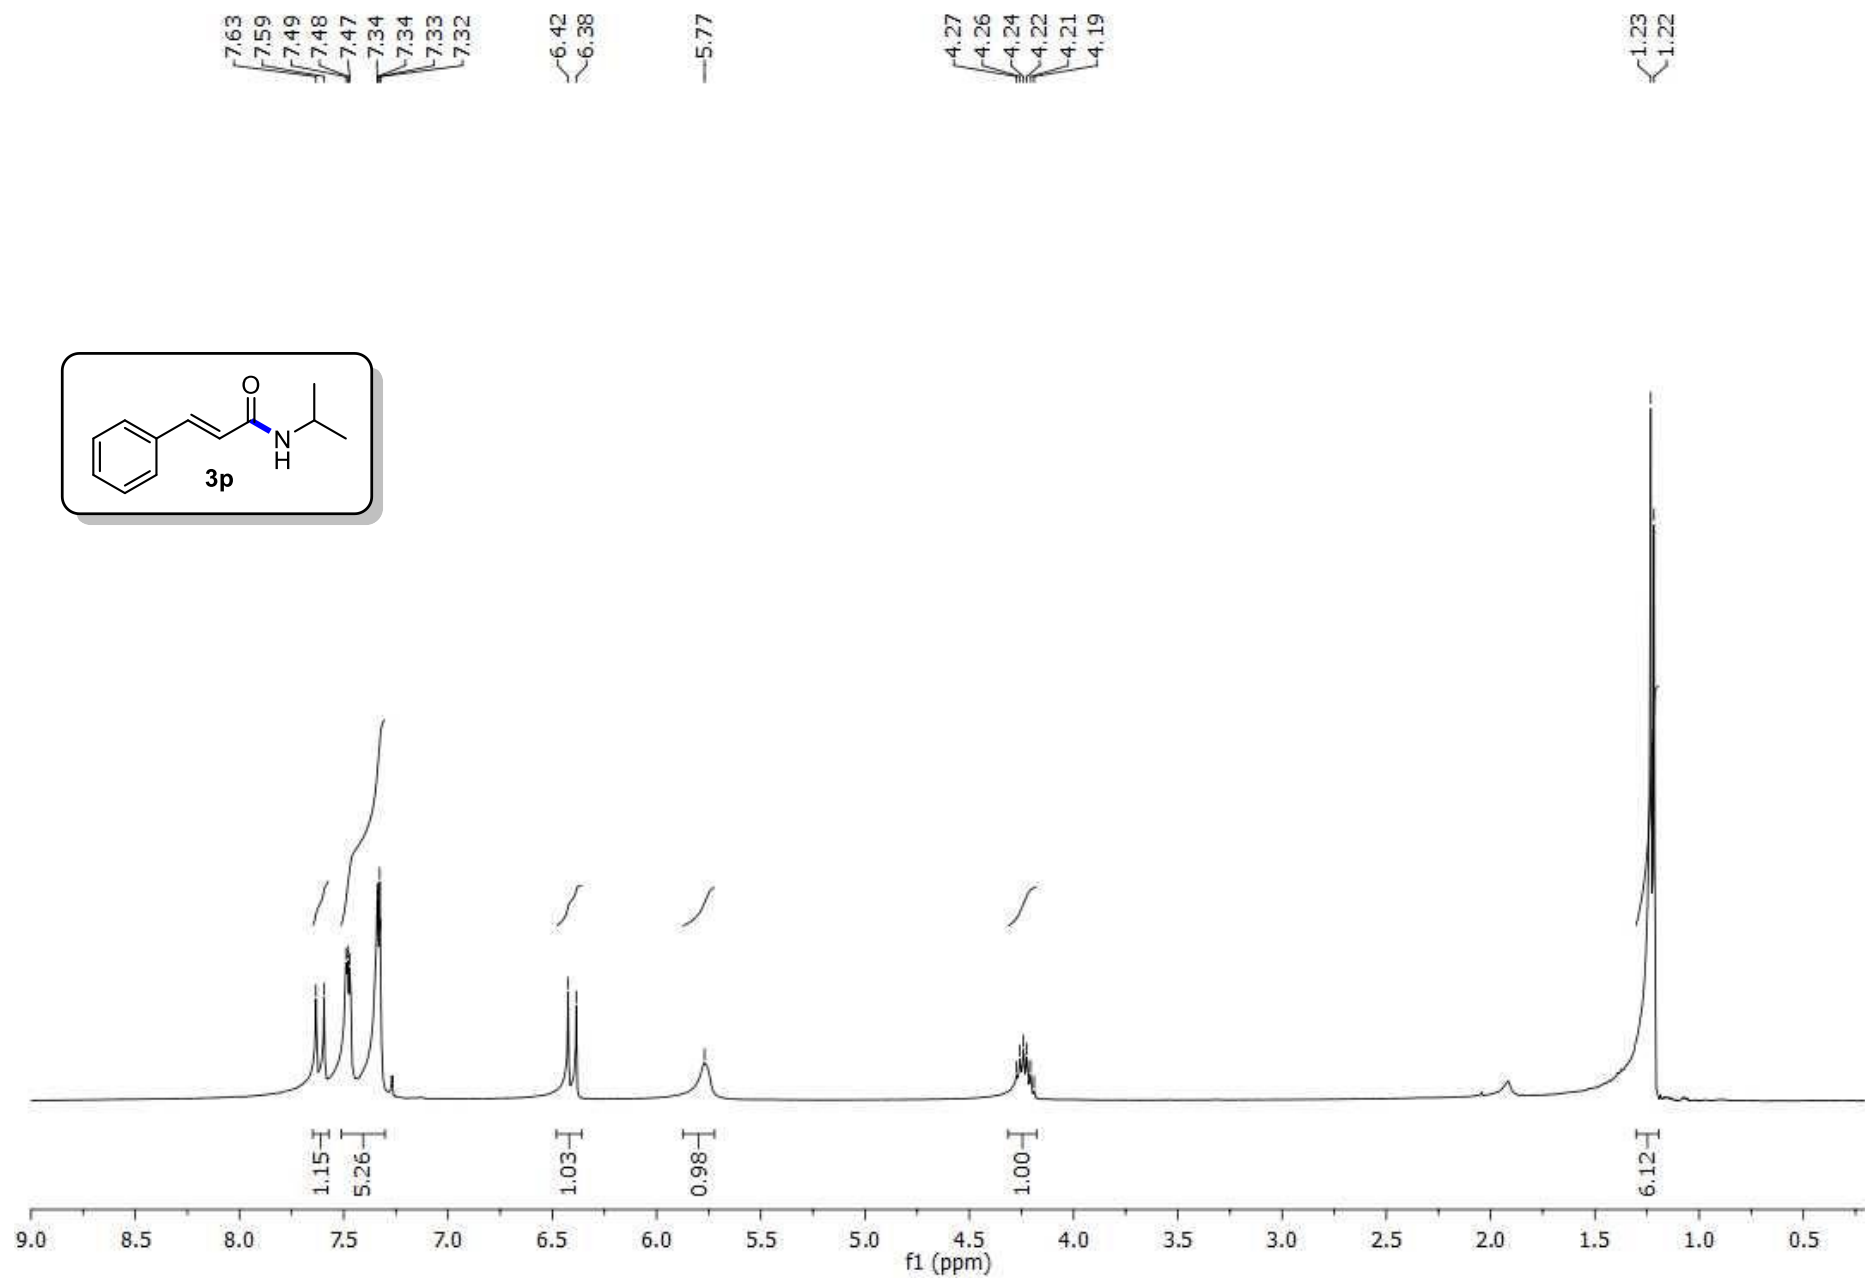



$^1\text{H}$  NMR ( $\text{CDCl}_3$ , 500 MHz) spectrum of 2-(6-methoxynaphthalen-2-yl)-*N*-phenylpropanamide (**3q**)

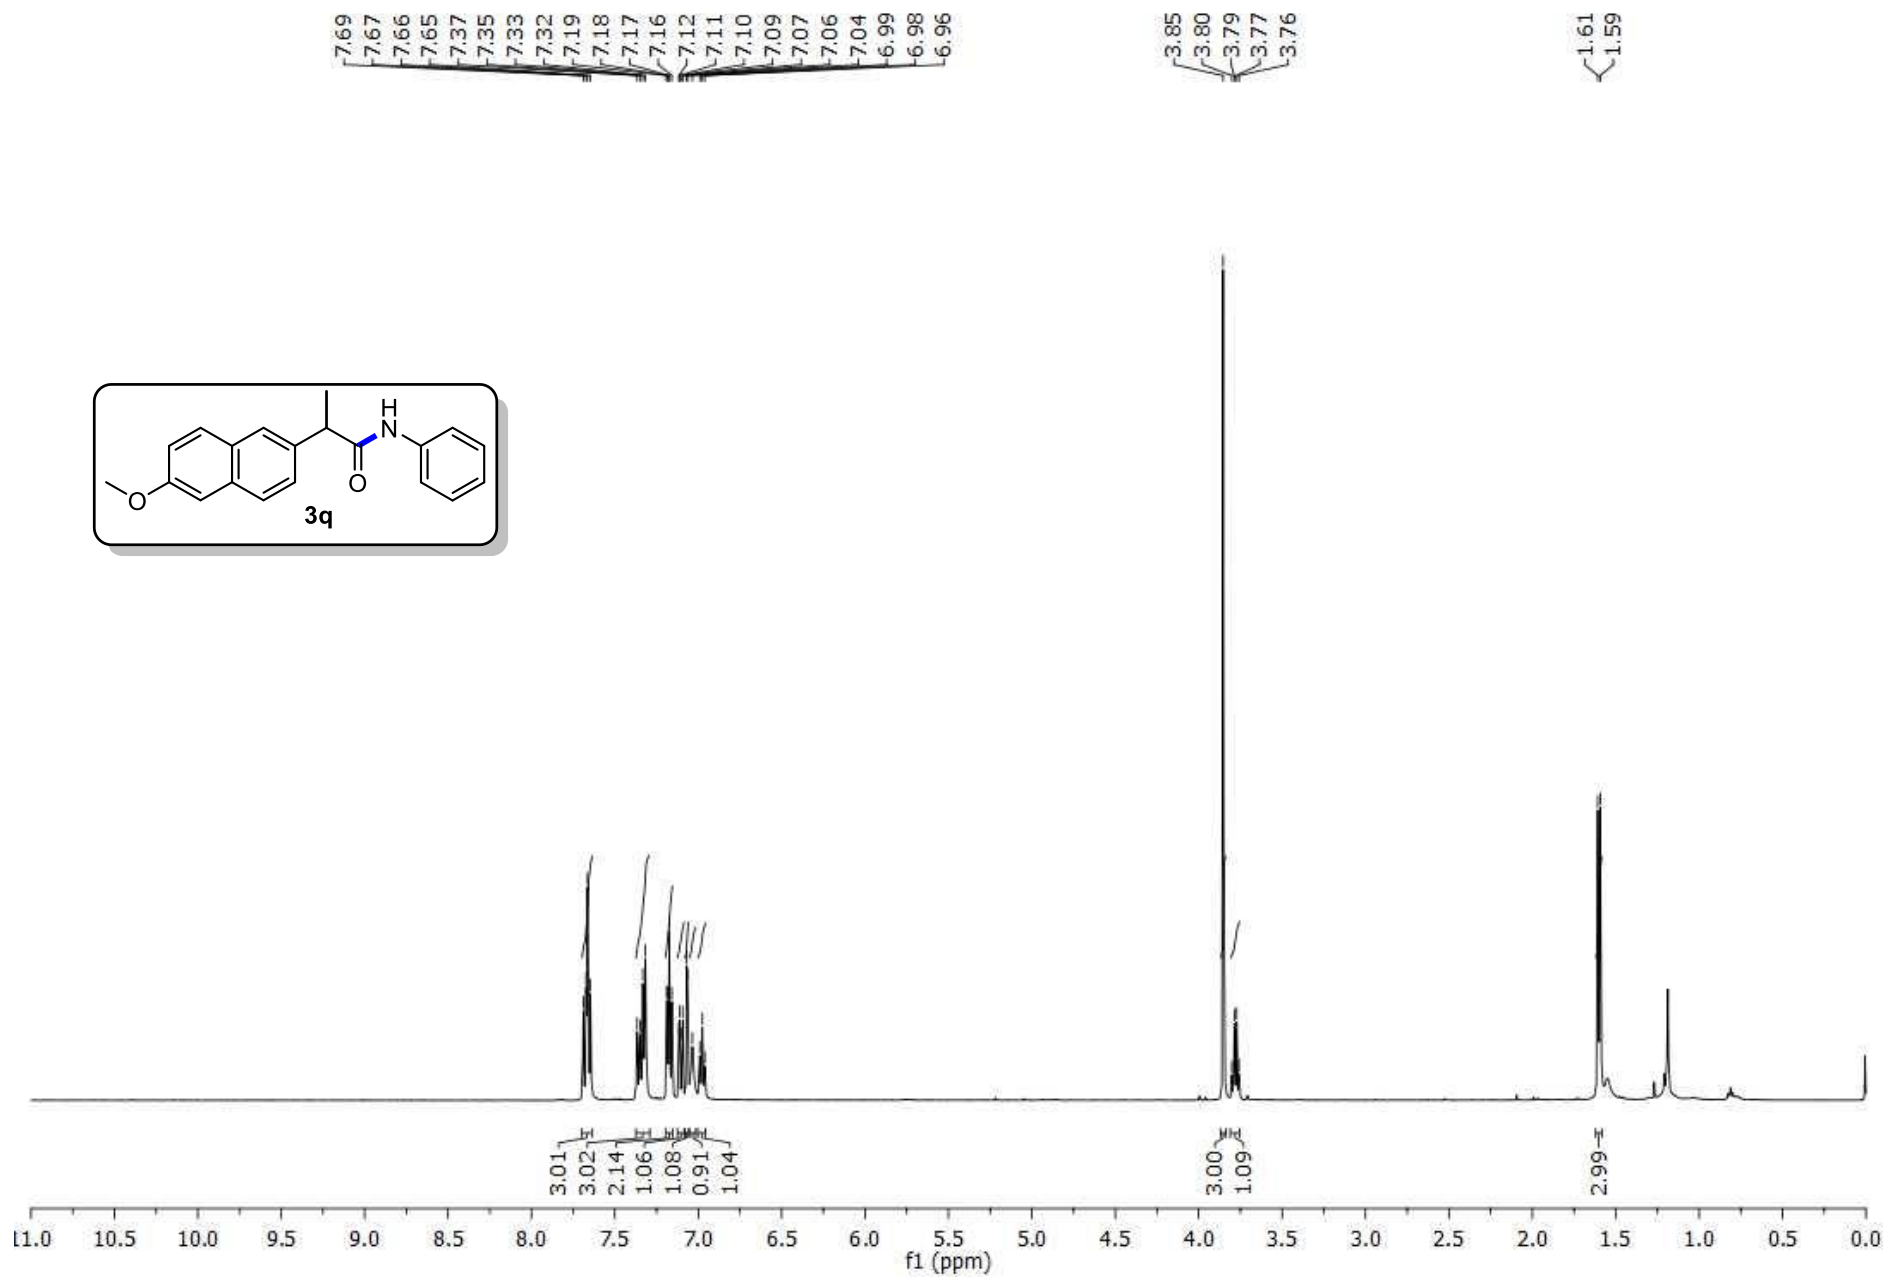

$^1\text{H}$  NMR ( $\text{CDCl}_3$ , 600 MHz) spectrum of 2-(4-isobutylphenyl)-N-phenylpropanamide (**3r**)

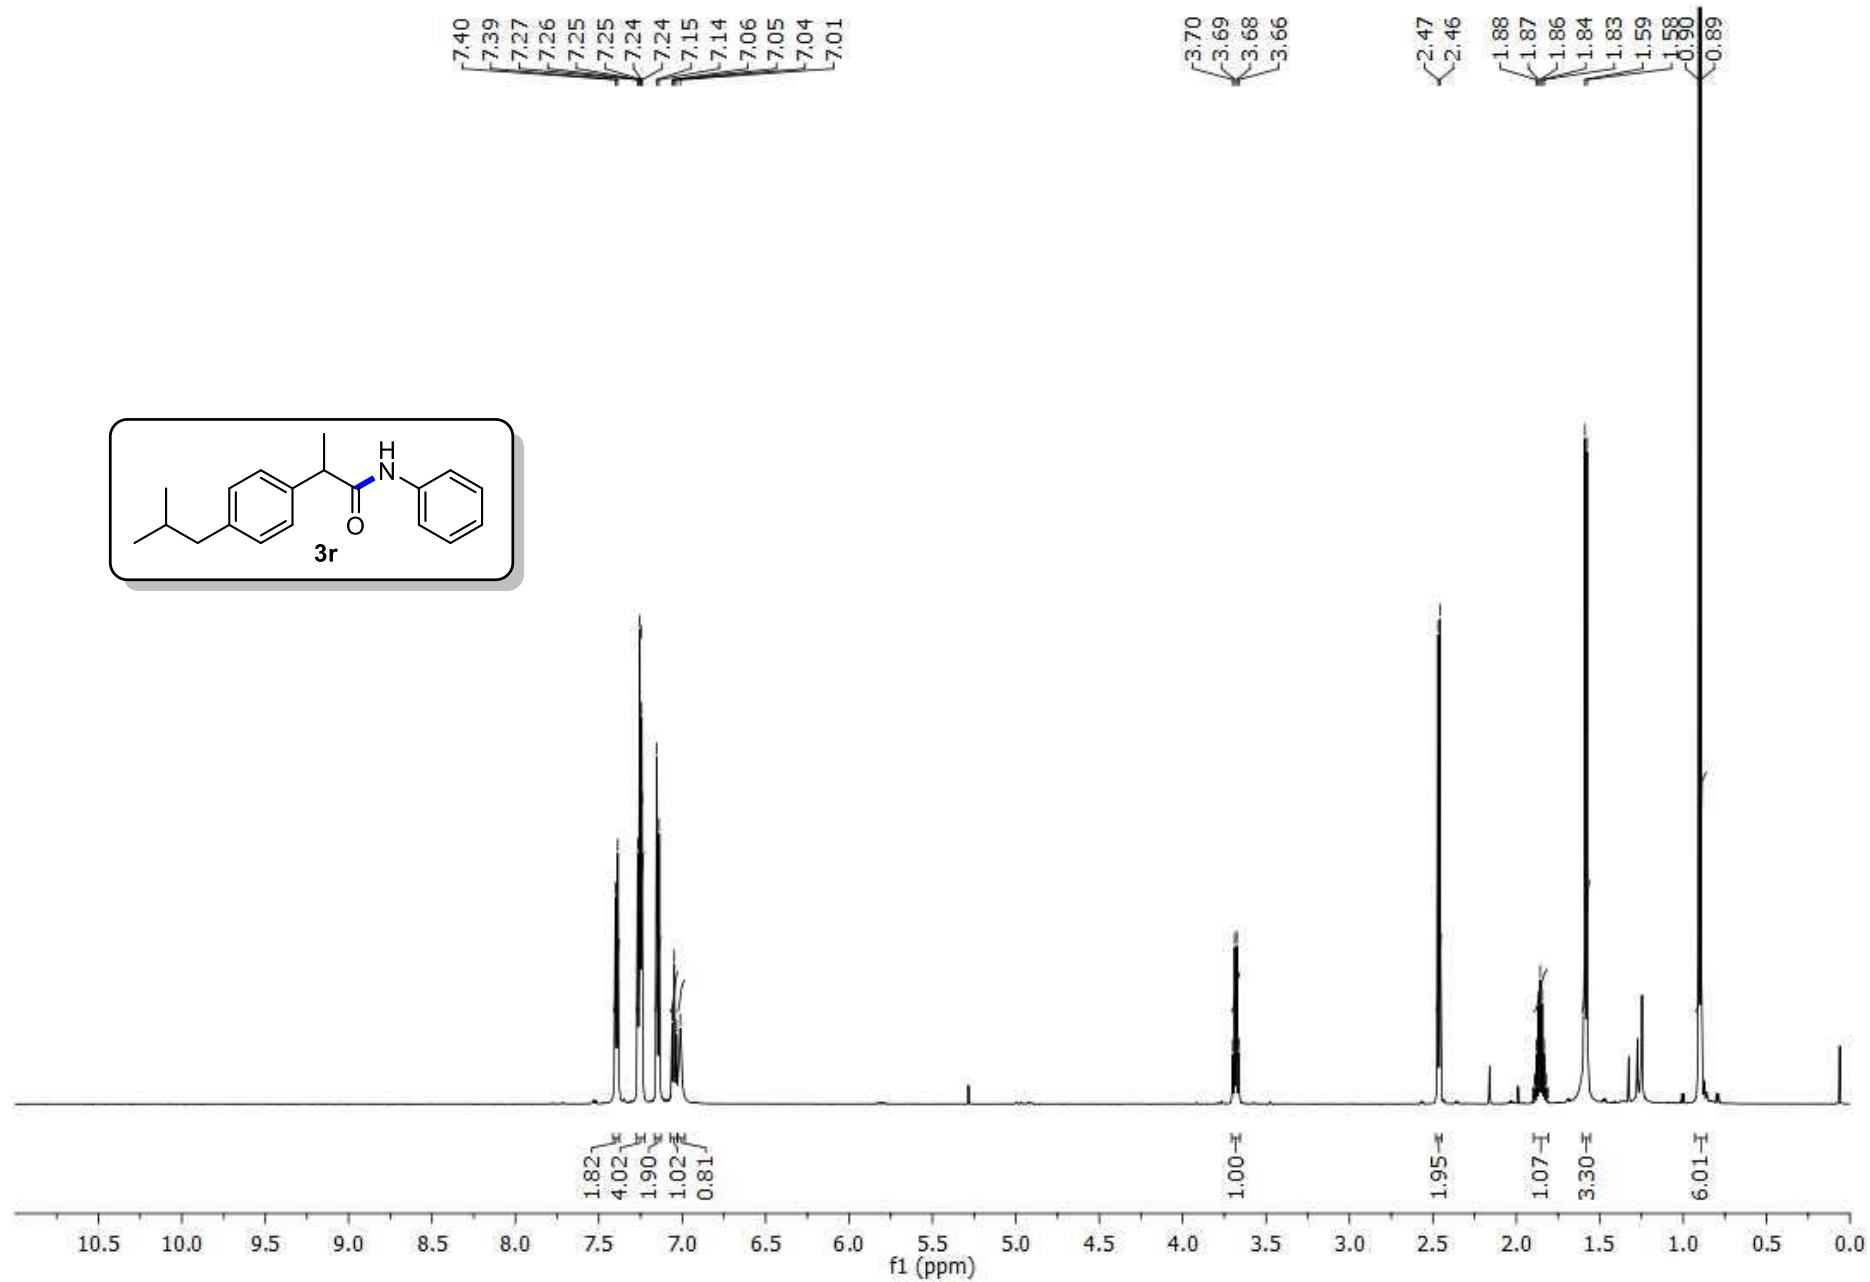

$^1\text{H}$  NMR ( $\text{CDCl}_3$ , 500 MHz) spectrum of *N*,2-diphenylbutanamide (**3s**)

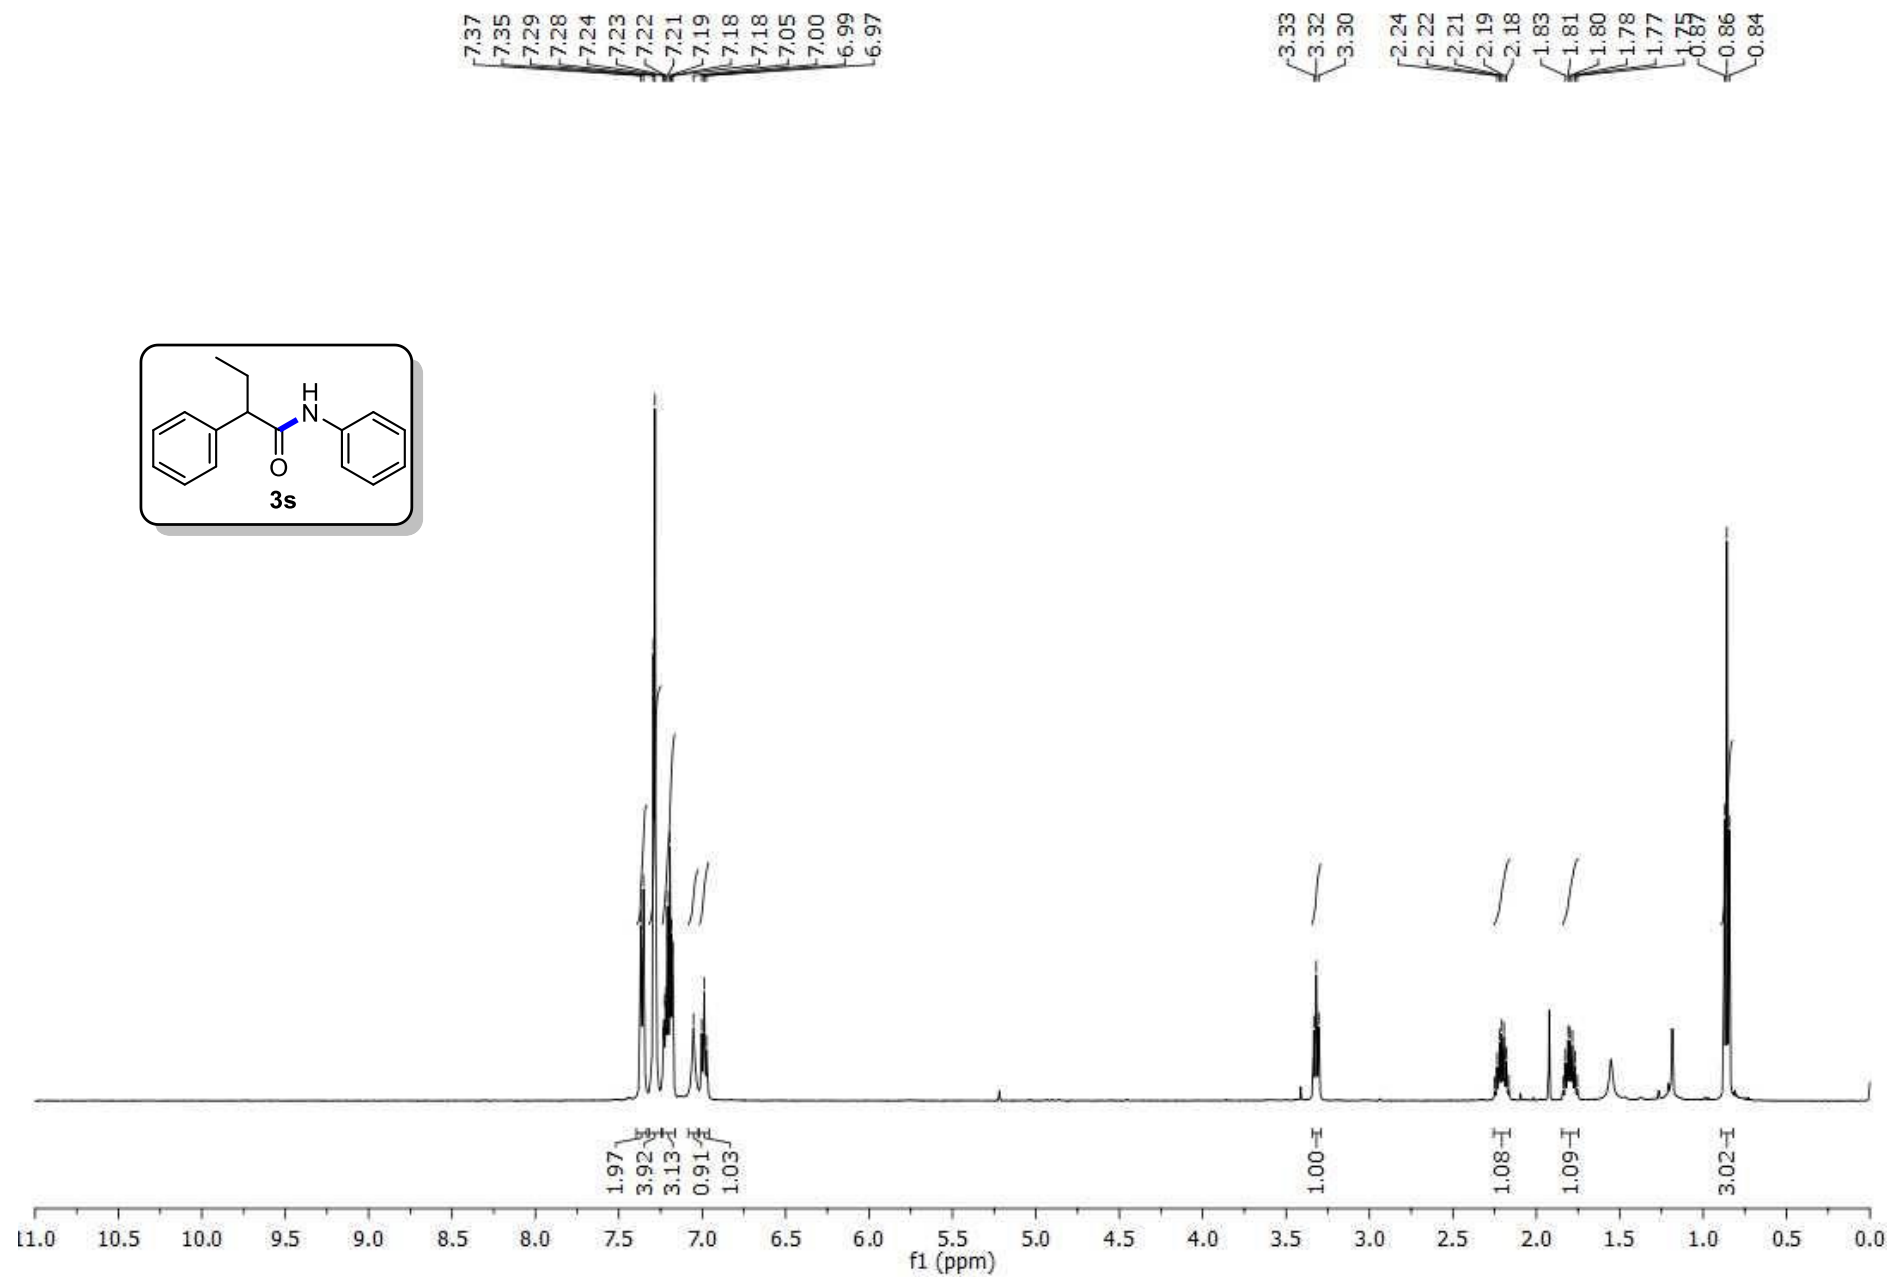

$^1\text{H}$  NMR ( $\text{CDCl}_3$ , 400 MHz) spectrum of *N*-Cyclohexyl-4-methoxybenzamide (**5a**)

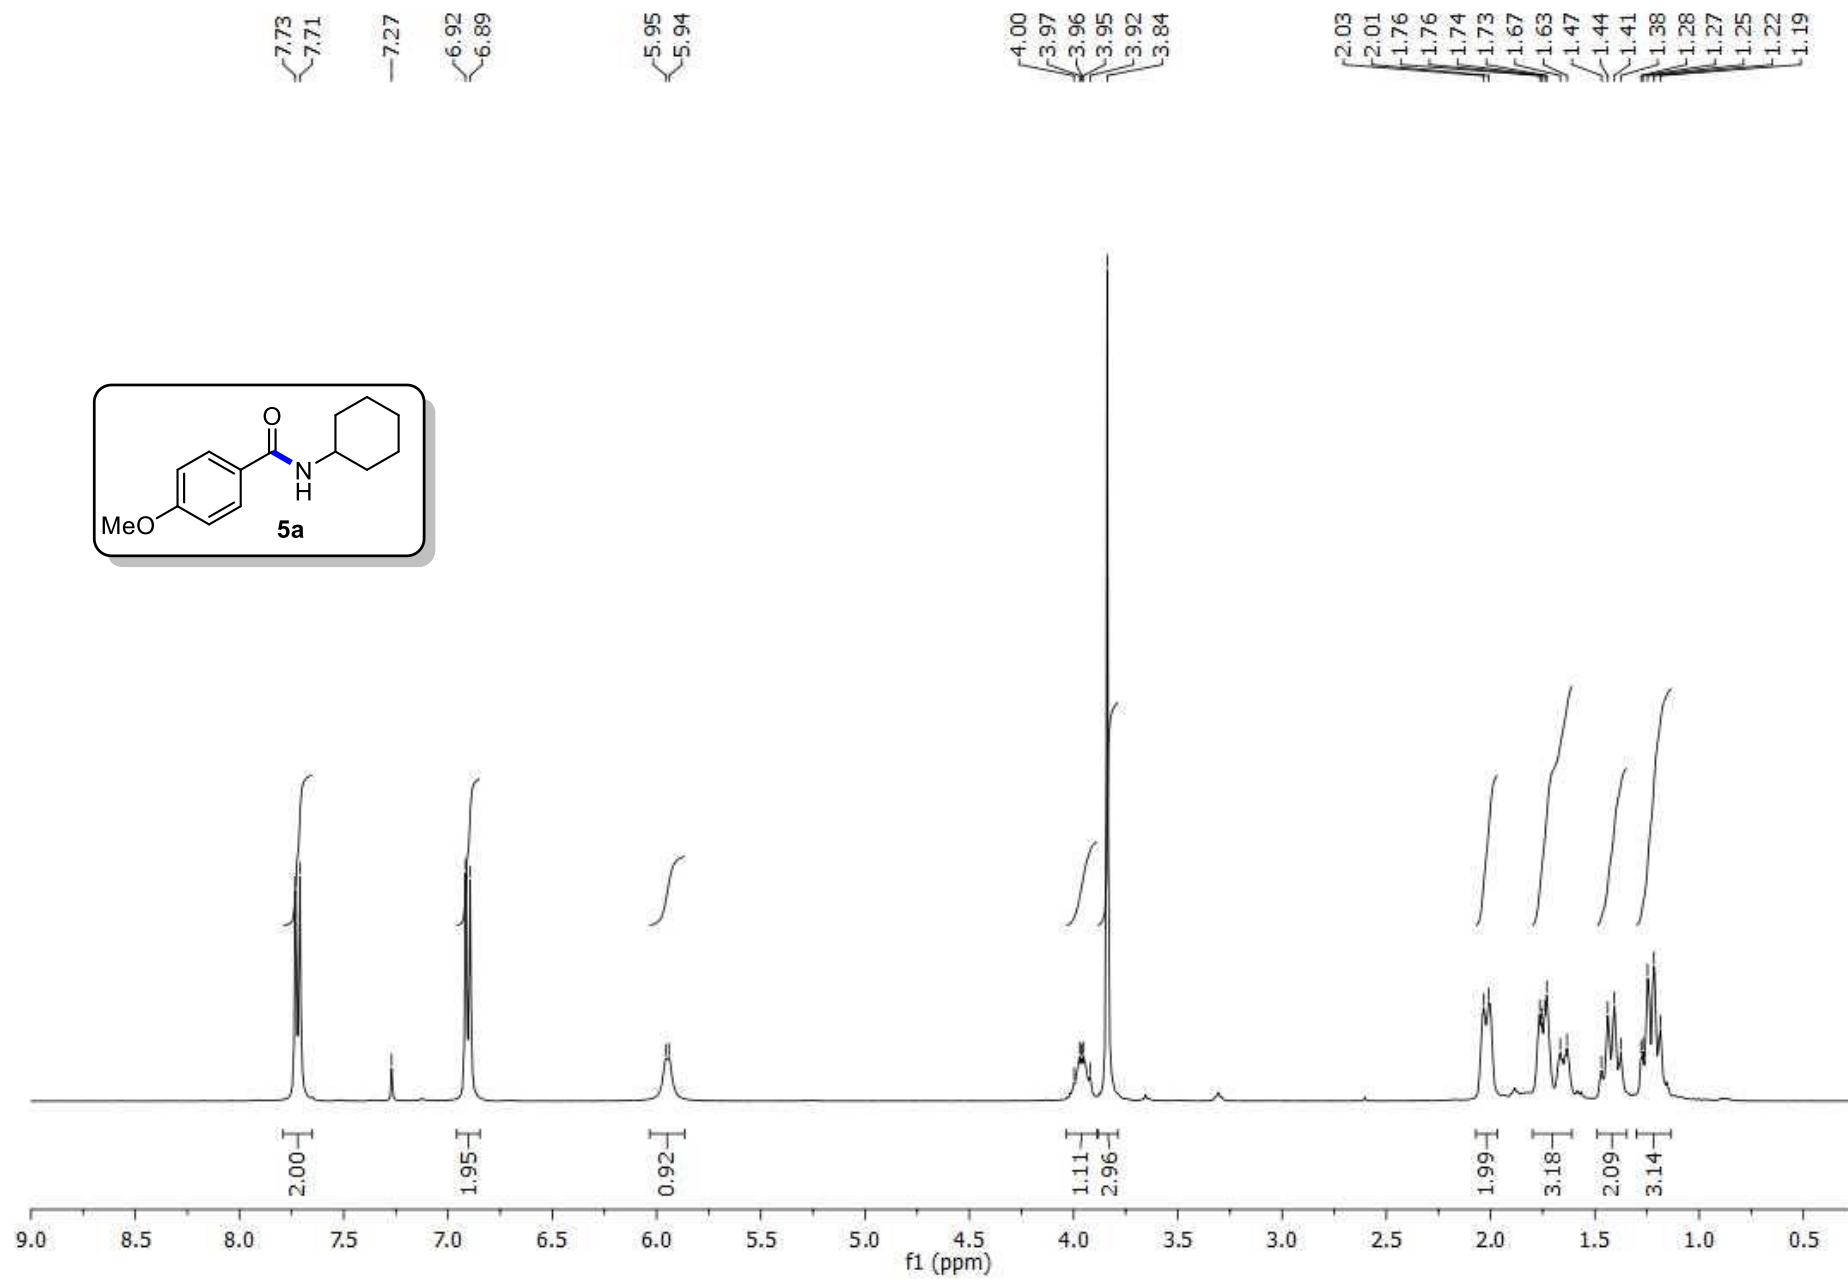

$^1\text{H}$  NMR ( $\text{CDCl}_3$ , 600 MHz) spectrum of *N*-Isopropyl-4-methoxybenzamide (**5b**)

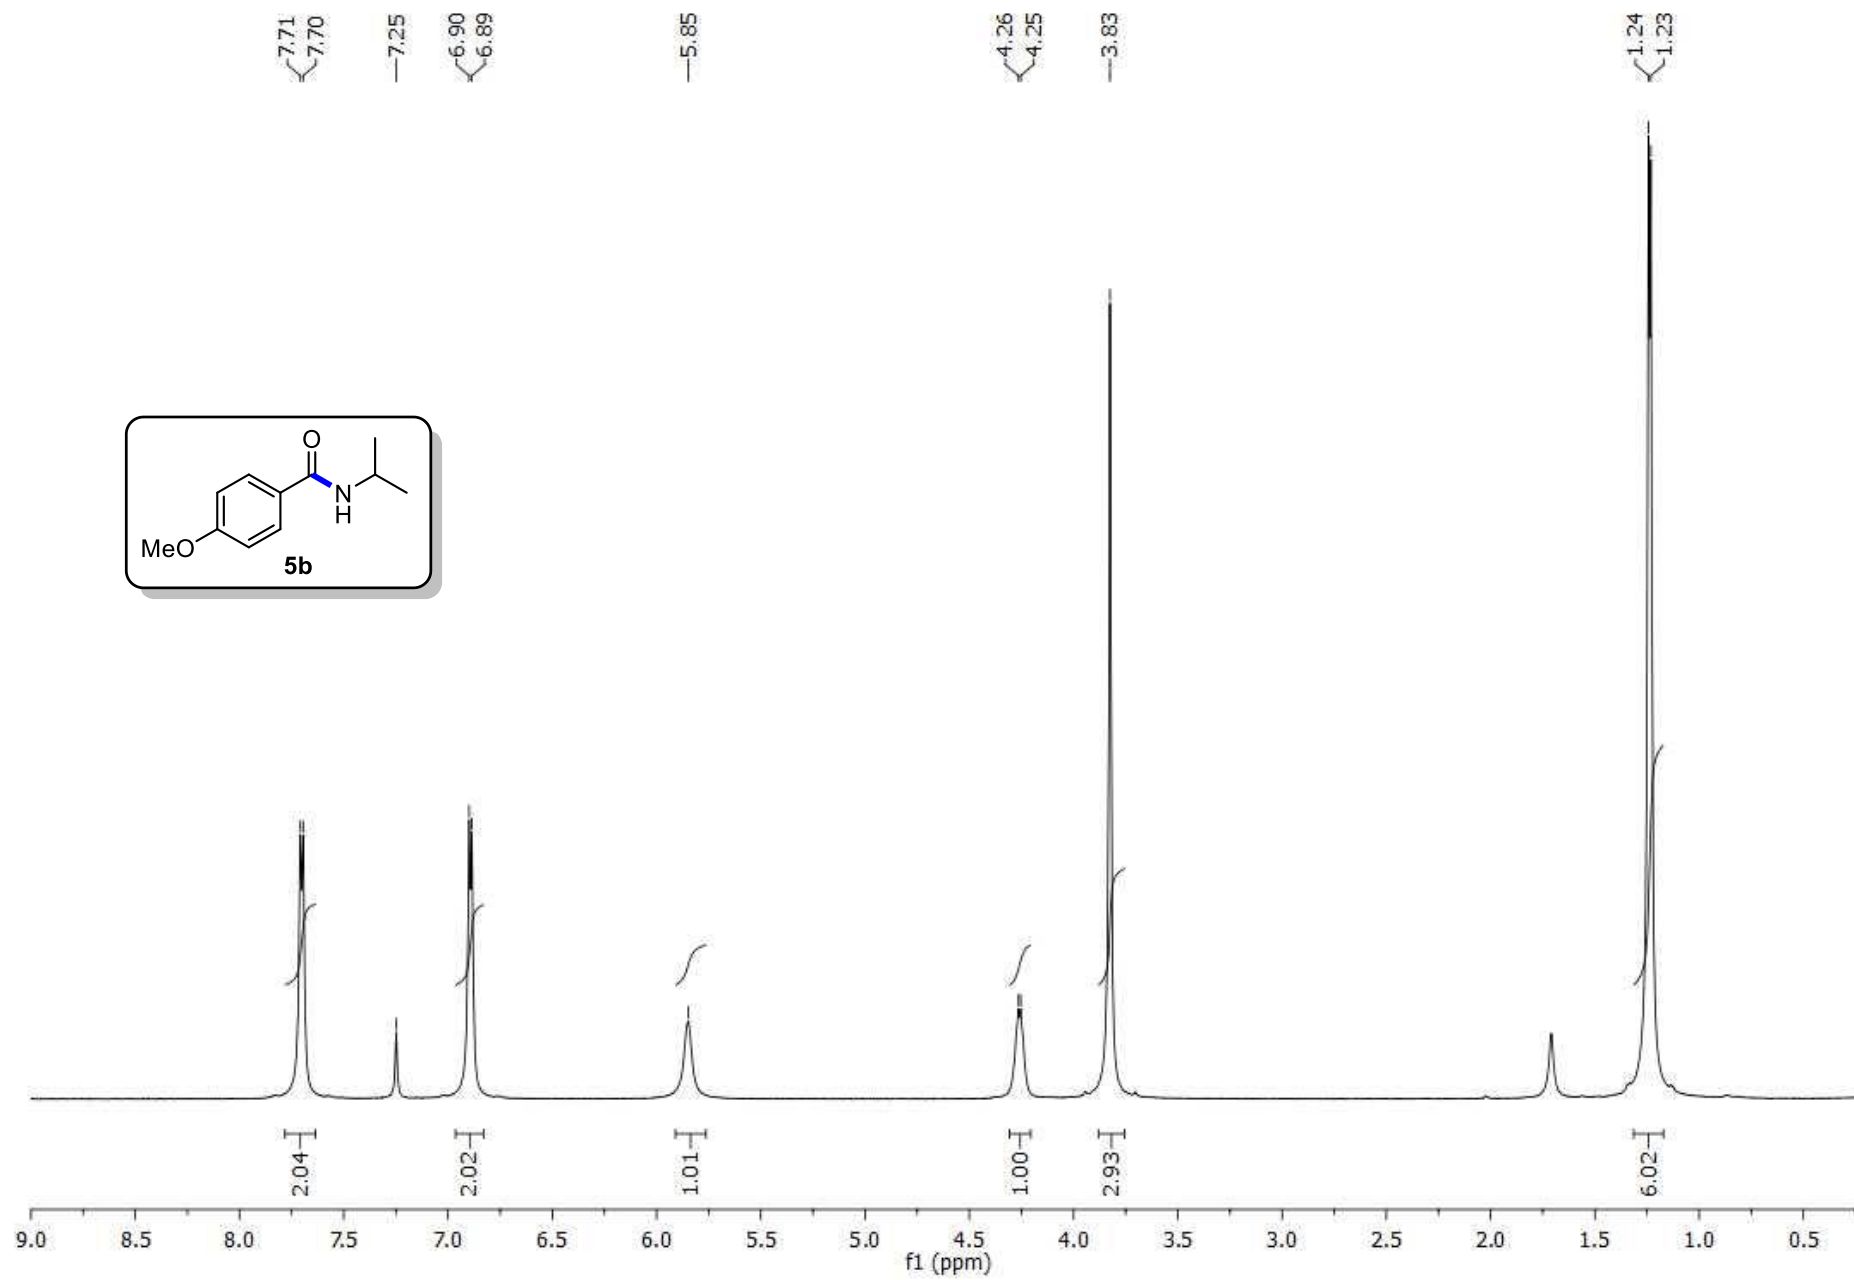

$^1\text{H}$  NMR ( $\text{CDCl}_3$ , 400 MHz) spectrum of *N*-Cyclohexyl-4-nitrobenzamide (**5c**)

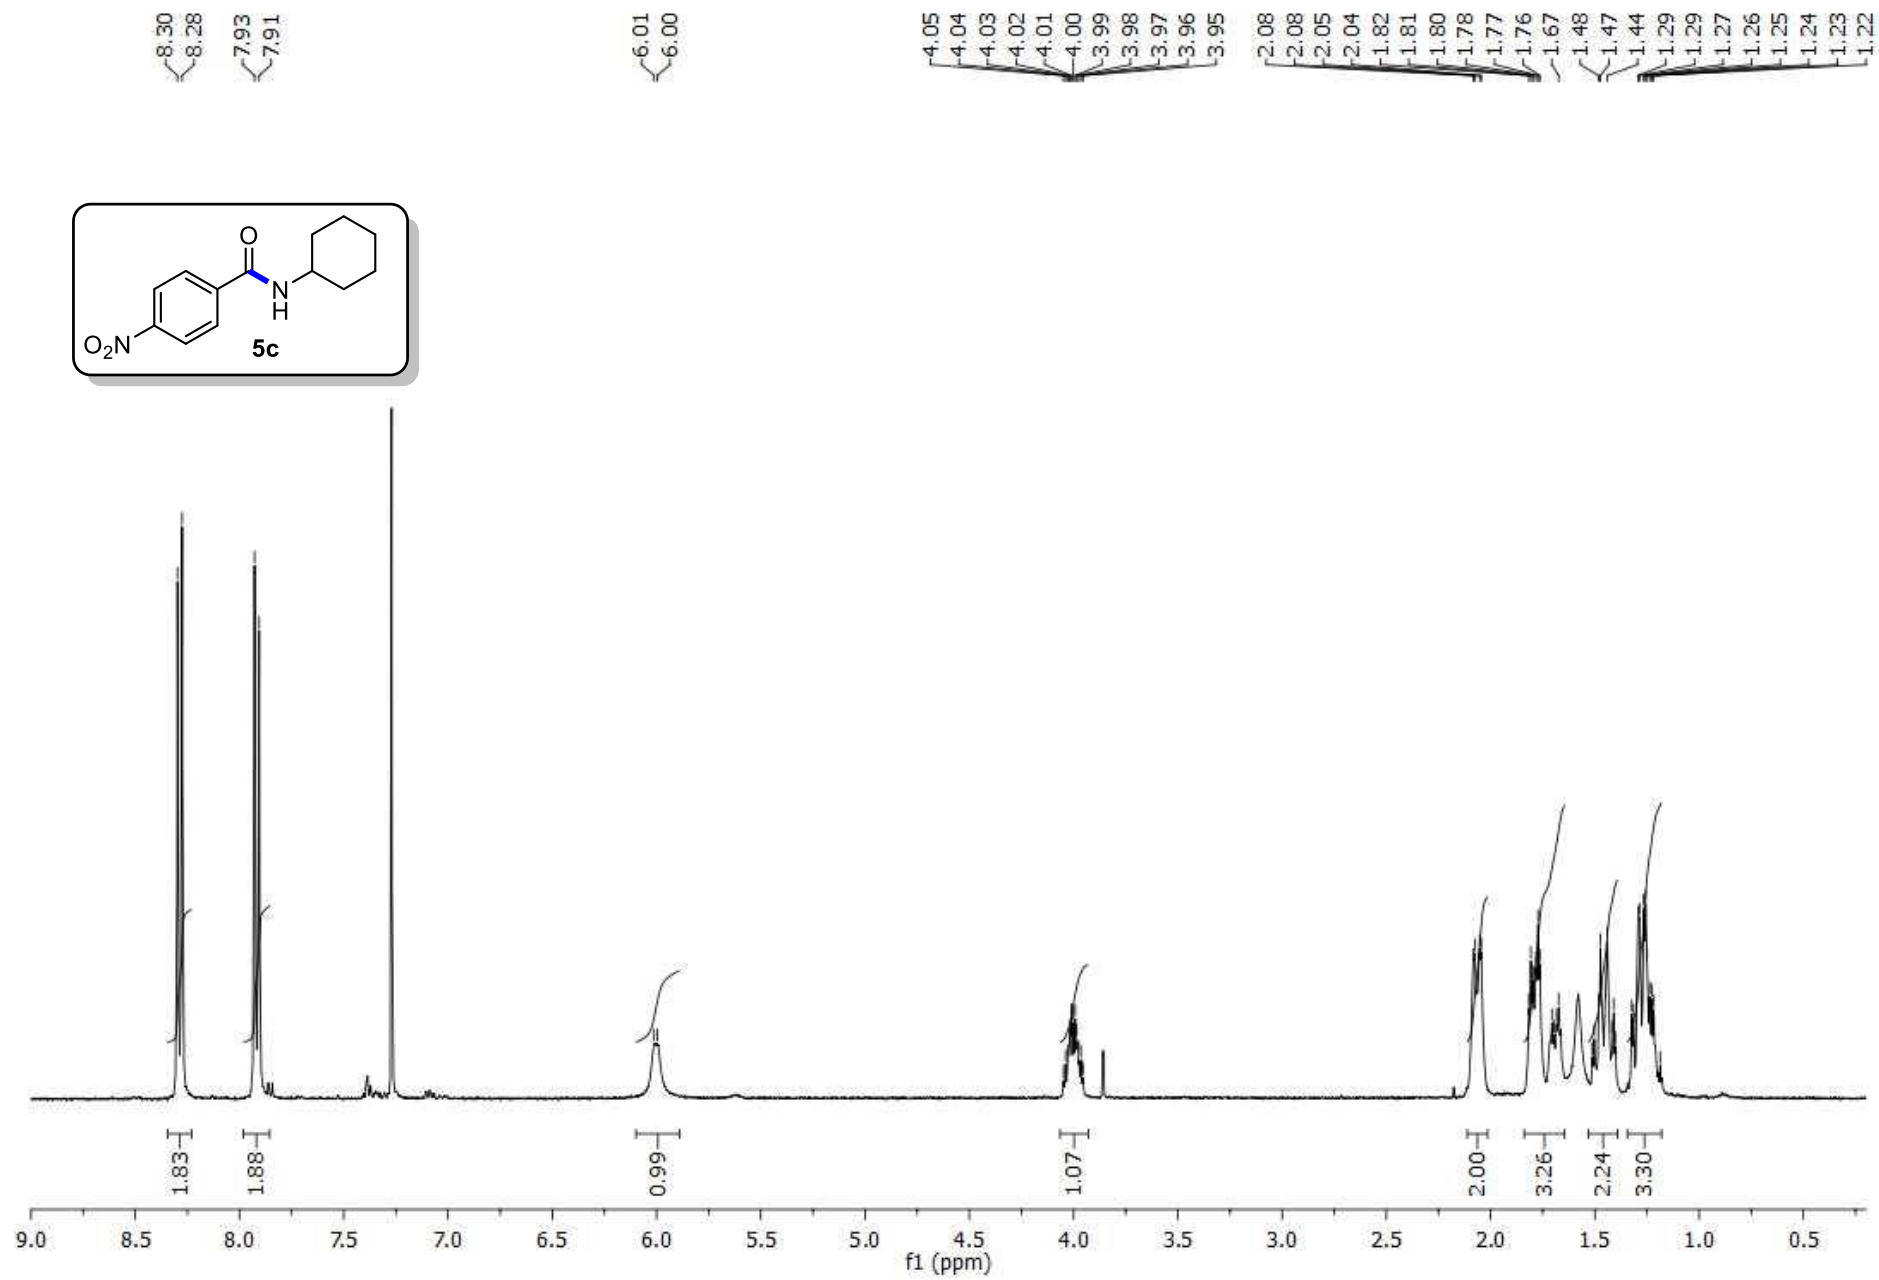

$^1\text{H}$  NMR ( $\text{CDCl}_3$ , 400 MHz) spectrum of *N*-Isopropyl-4-nitrobenzamide (**5d**)

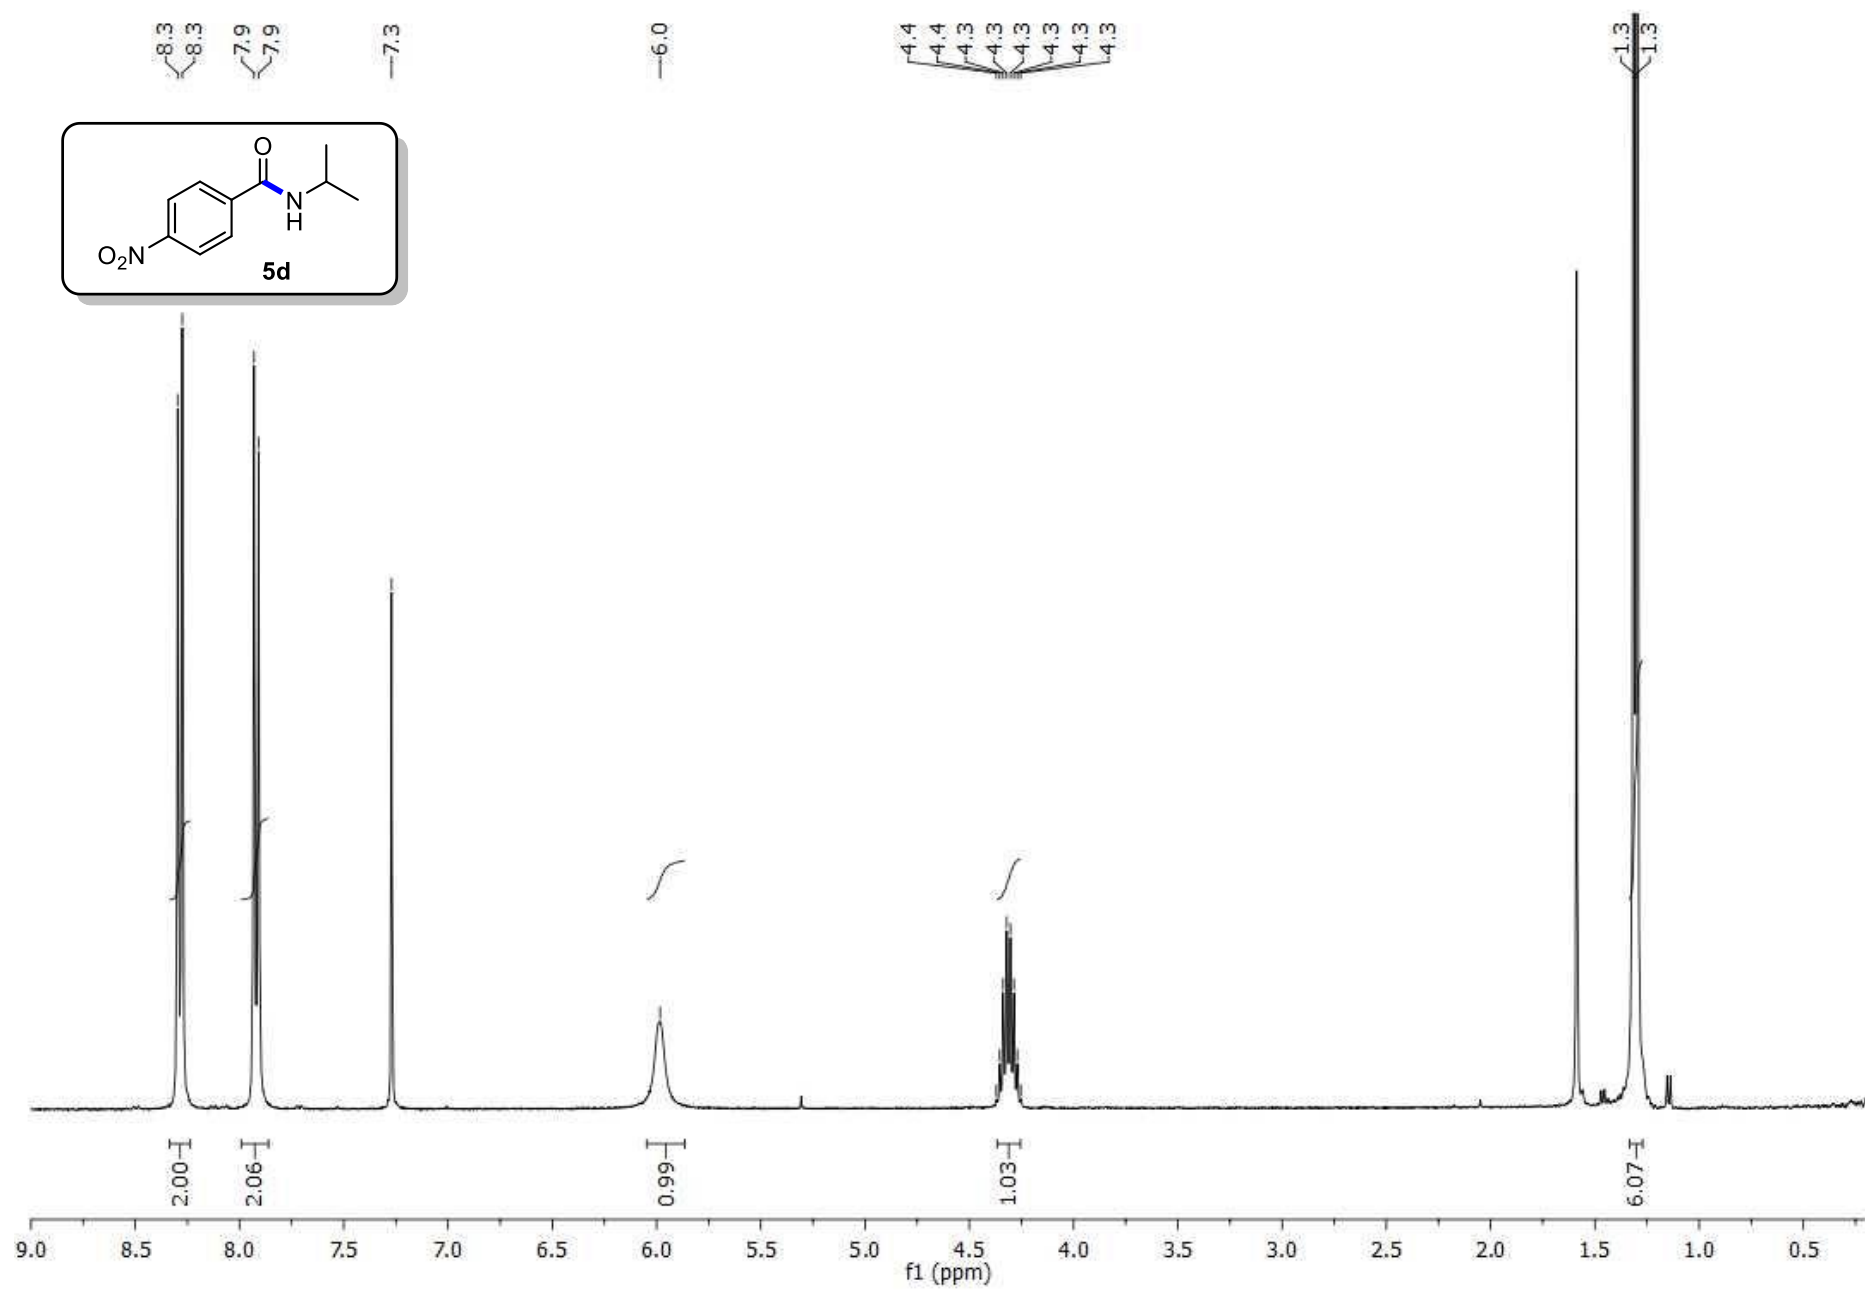

$^1\text{H}$  NMR ( $\text{CDCl}_3$ , 400 MHz) spectrum of 4-Chloro-*N*-cyclohexylbenzamide (**5e**)

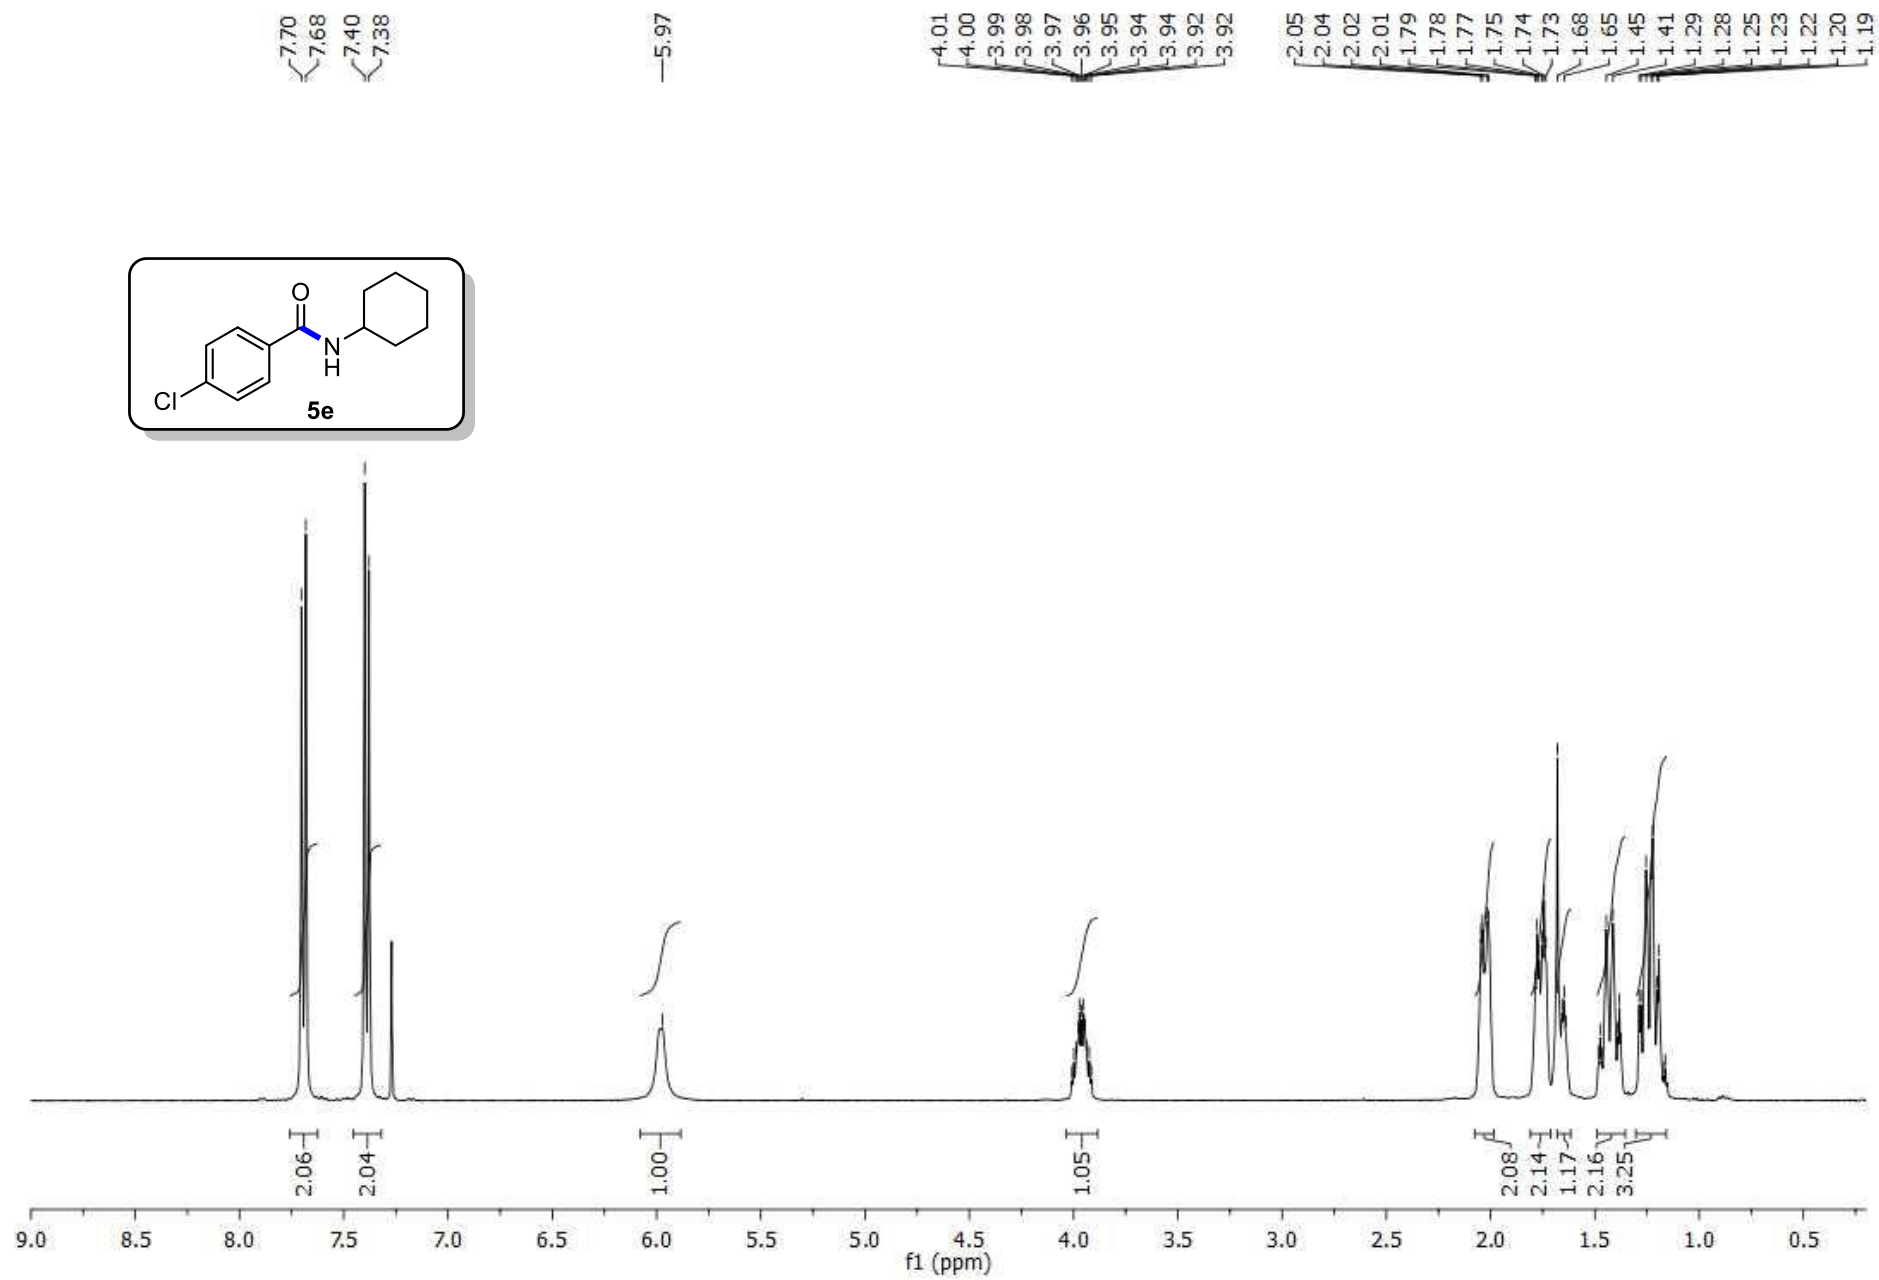



$^1\text{H}$  NMR ( $\text{CDCl}_3$ , 400 MHz) spectrum of 4-Chloro-*N*-isopropylbenzamide (**5f**)

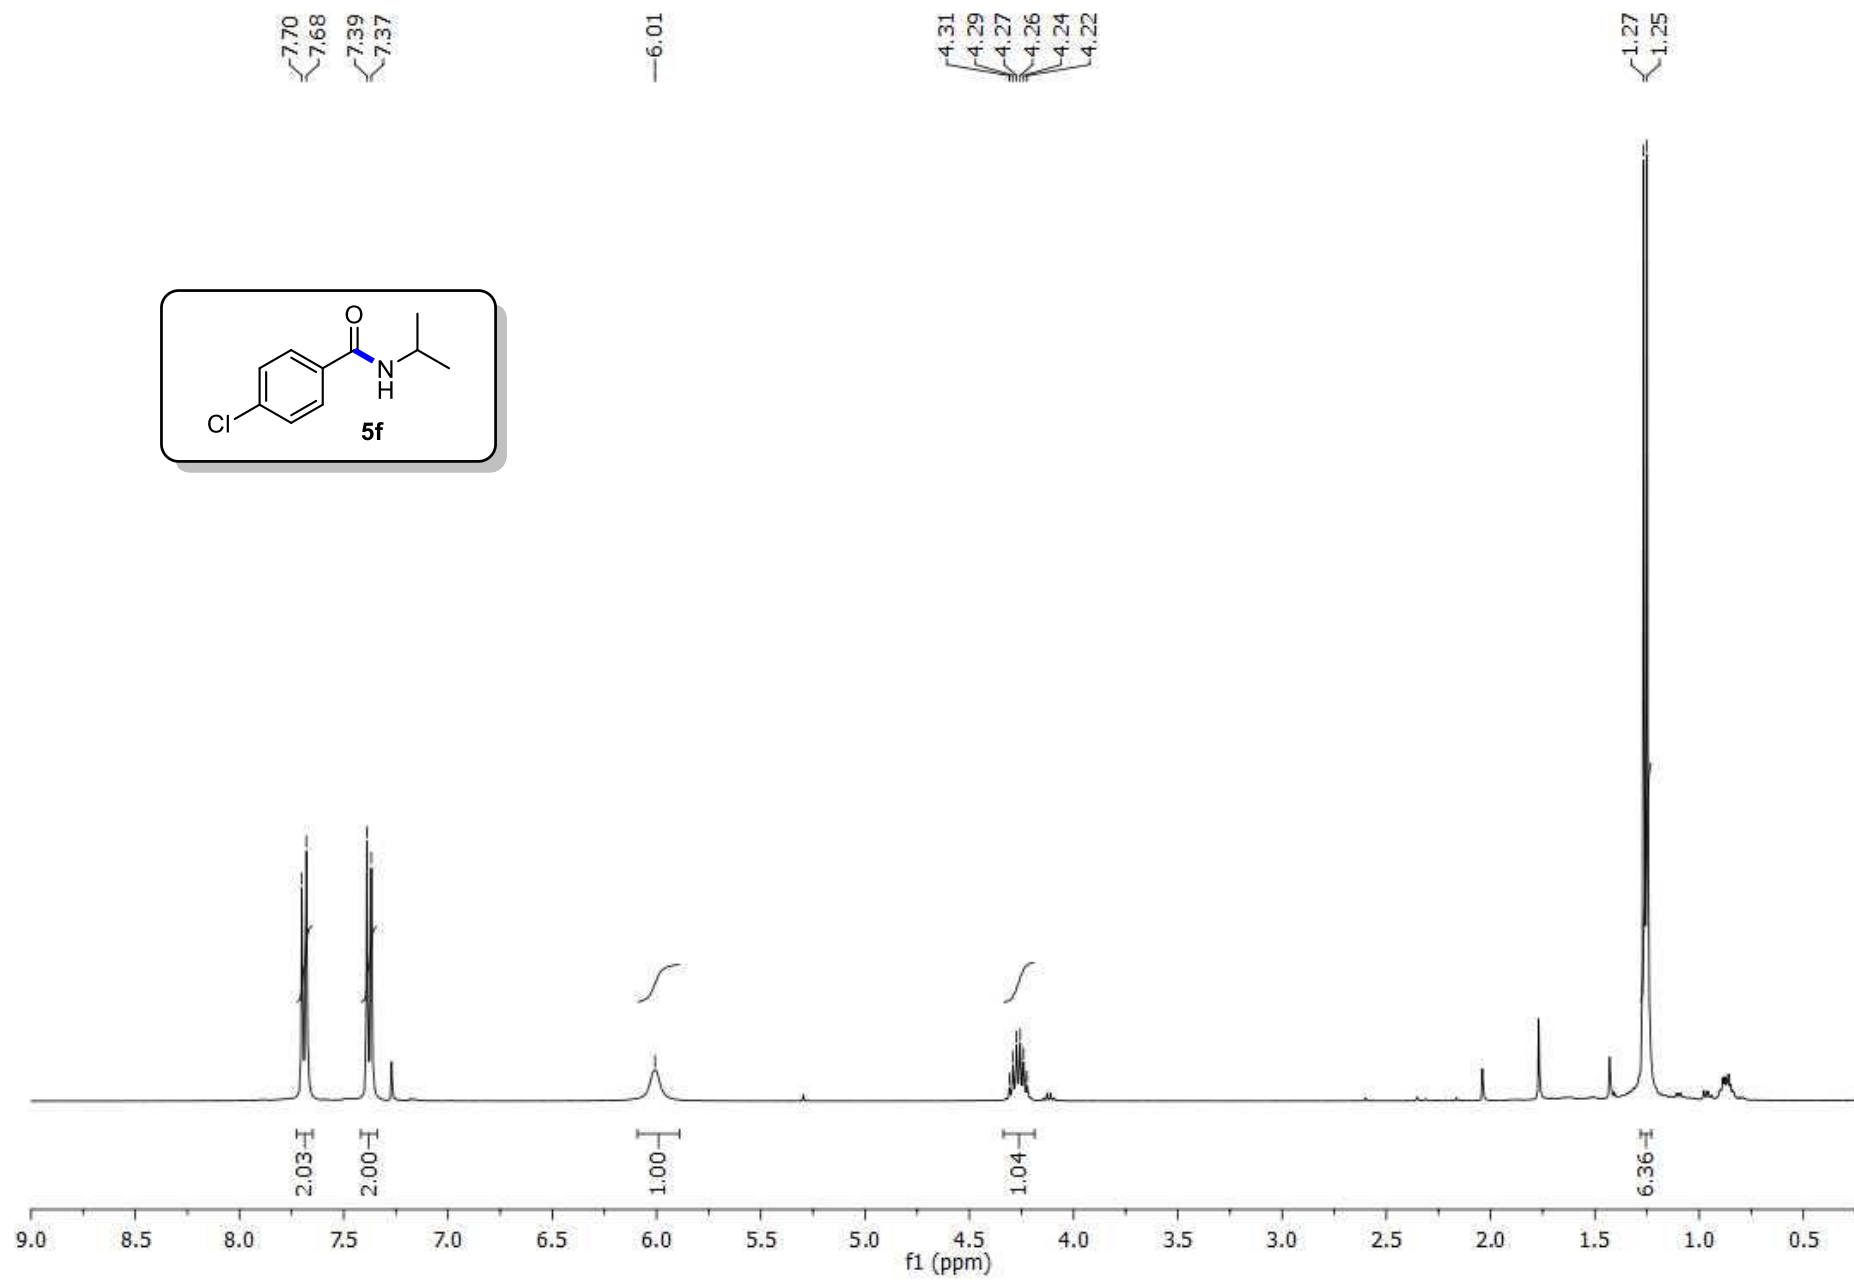

<sup>1</sup>H NMR (CDCl<sub>3</sub>, 400 MHz) spectrum of *N*-Cyclohexyl-3-methoxybenzamide (**5g**)

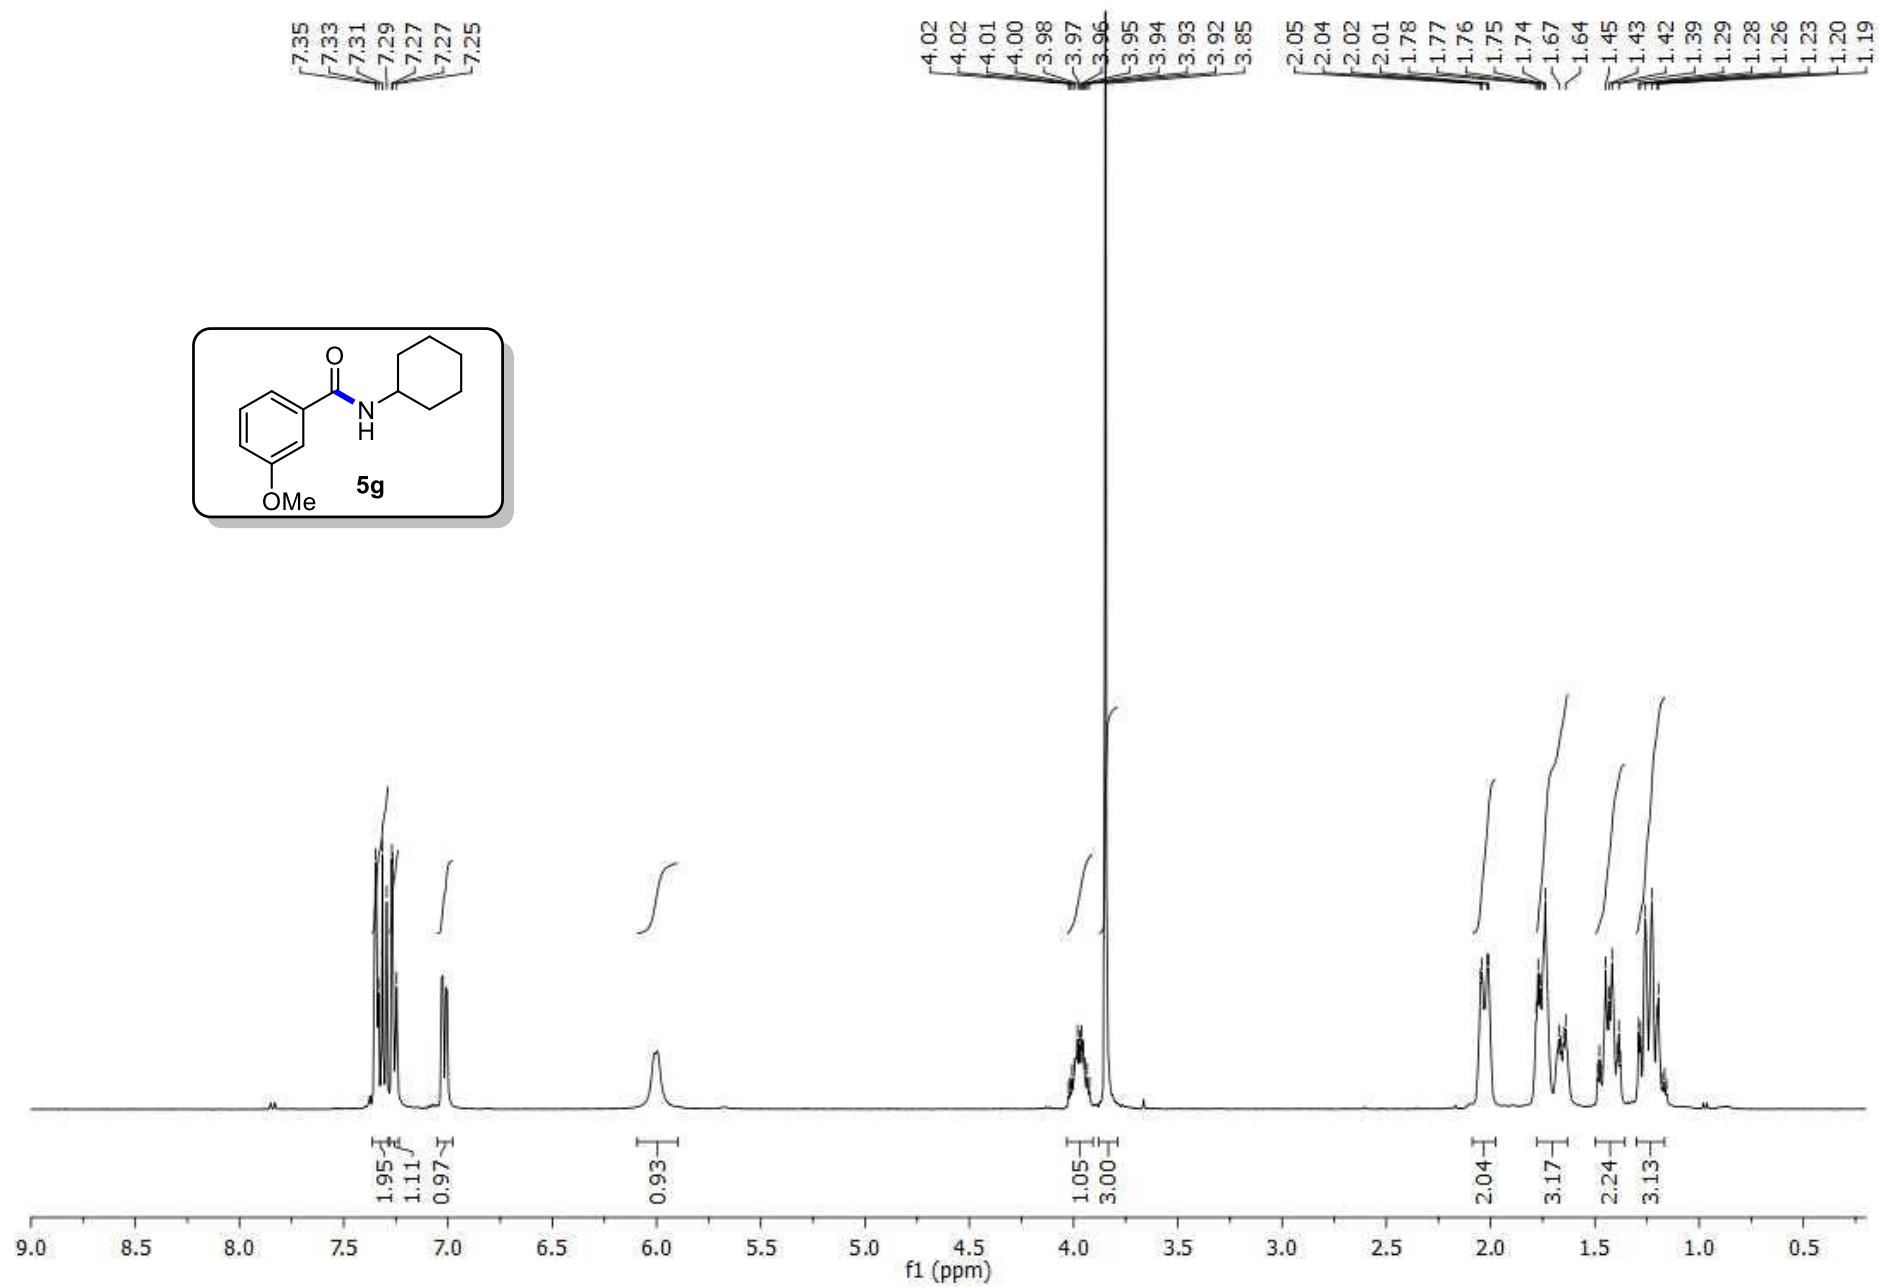

$^1\text{H}$  NMR ( $\text{CDCl}_3$ , 400 MHz) spectrum of *N*-Isopropyl-3-methoxybenzamide (**5h**)

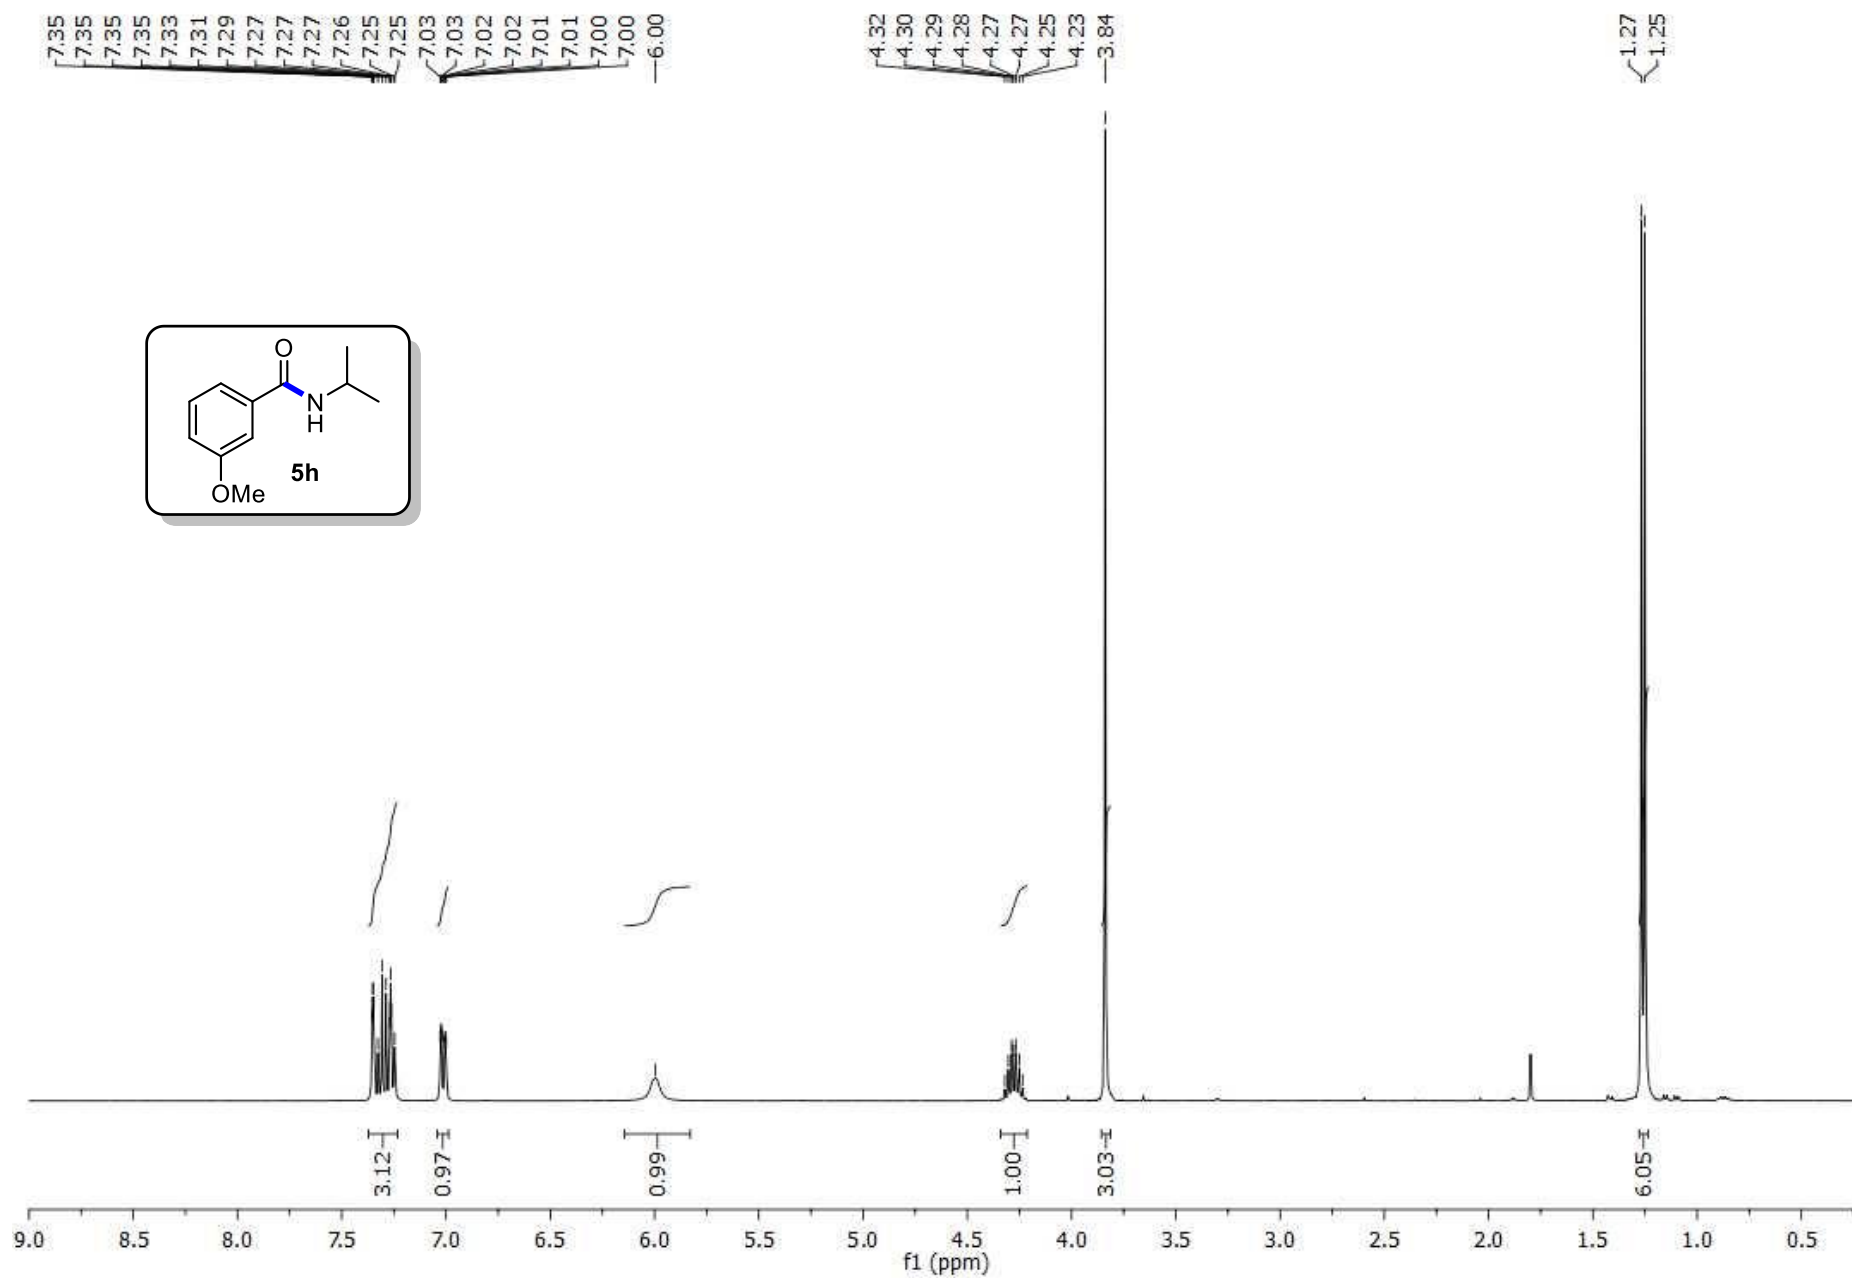

$^1\text{H}$  NMR ( $\text{CDCl}_3$ , 400 MHz) spectrum of 3-Chloro-*N*-cyclohexylbenzamide (**5i**)

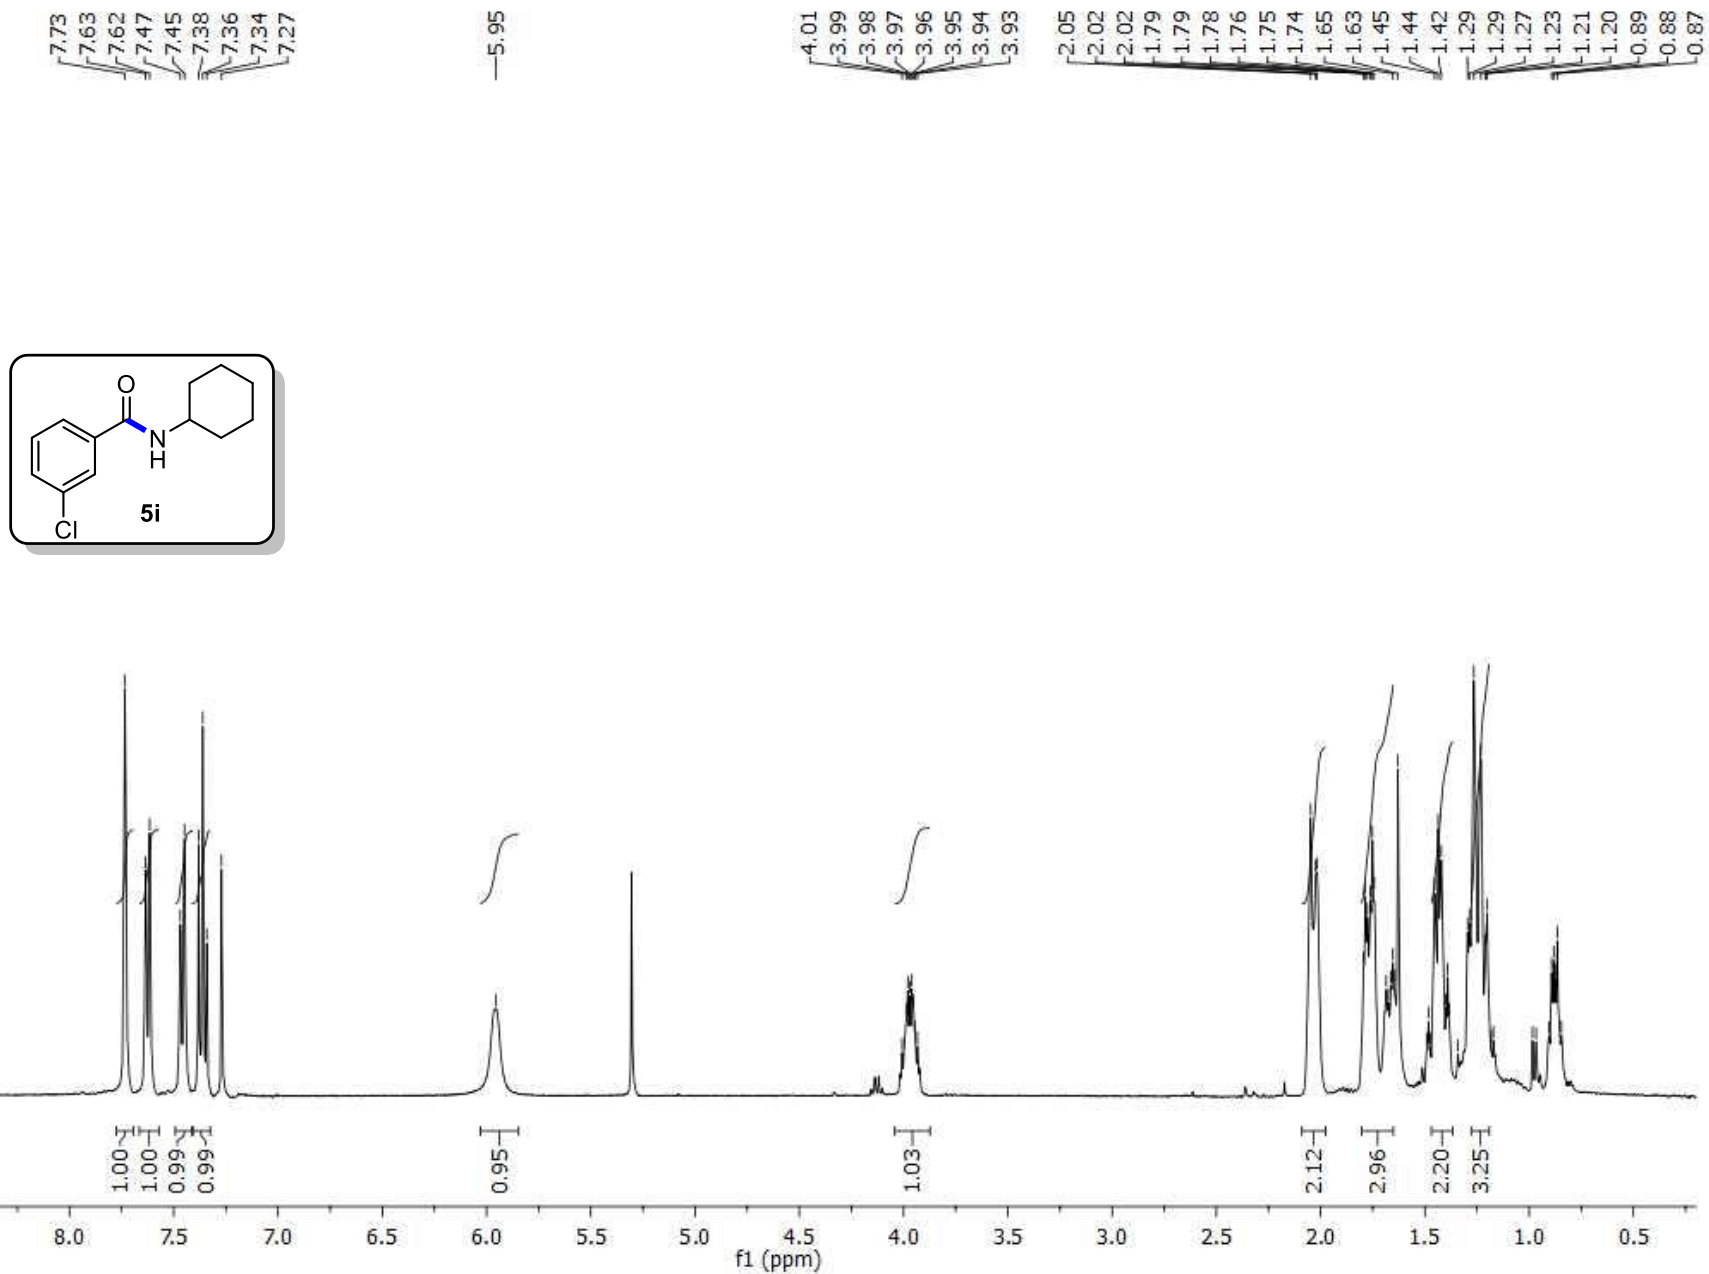

$^1\text{H}$  NMR ( $\text{CDCl}_3$ , 400 MHz) spectrum of 3-Chloro-*N*-isopropylbenzamide (**5j**)

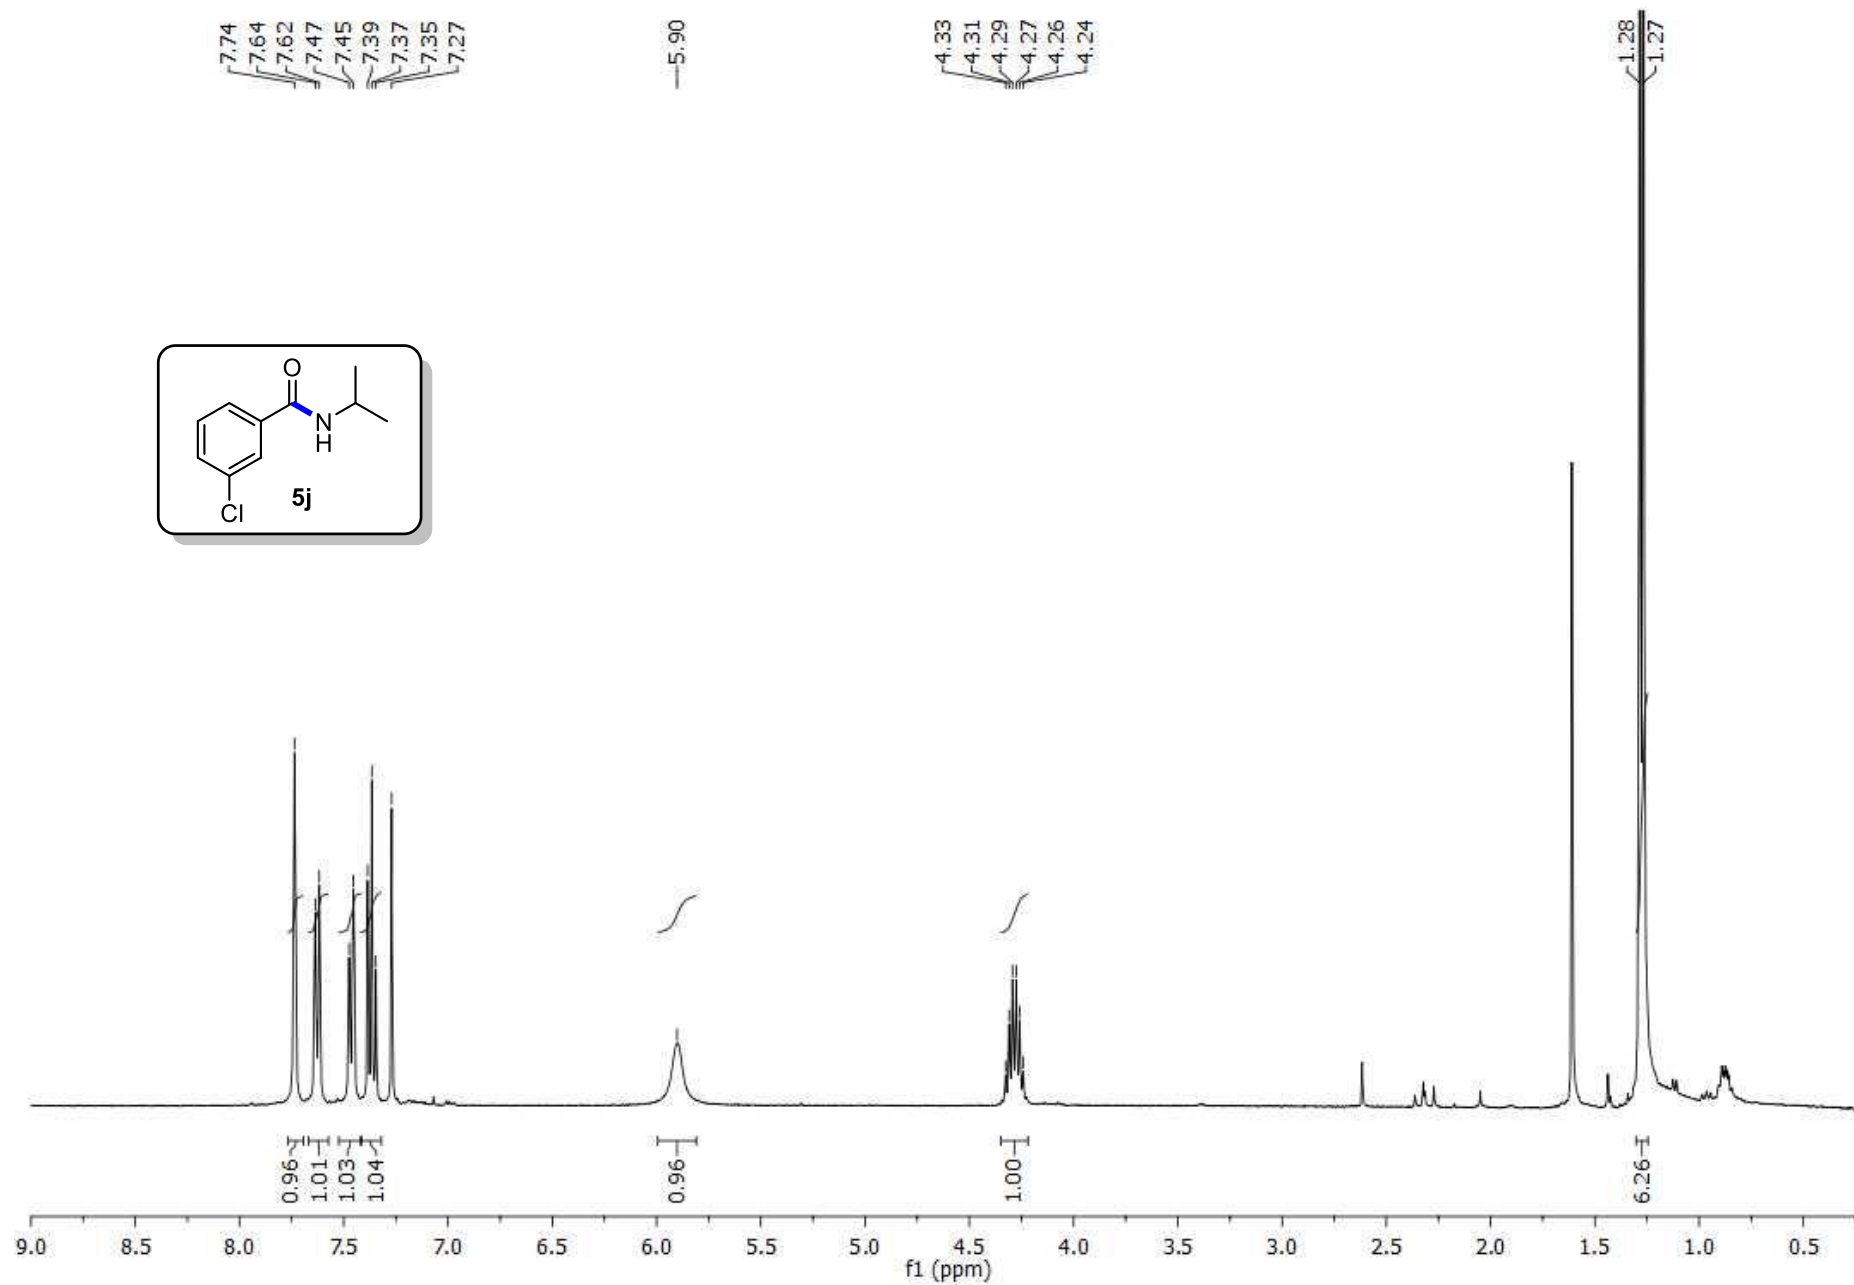

$^1\text{H}$  NMR ( $\text{CDCl}_3$ , 400 MHz) spectrum of *N*-Cyclohexyl-2-iodobenzamide (**5k**)

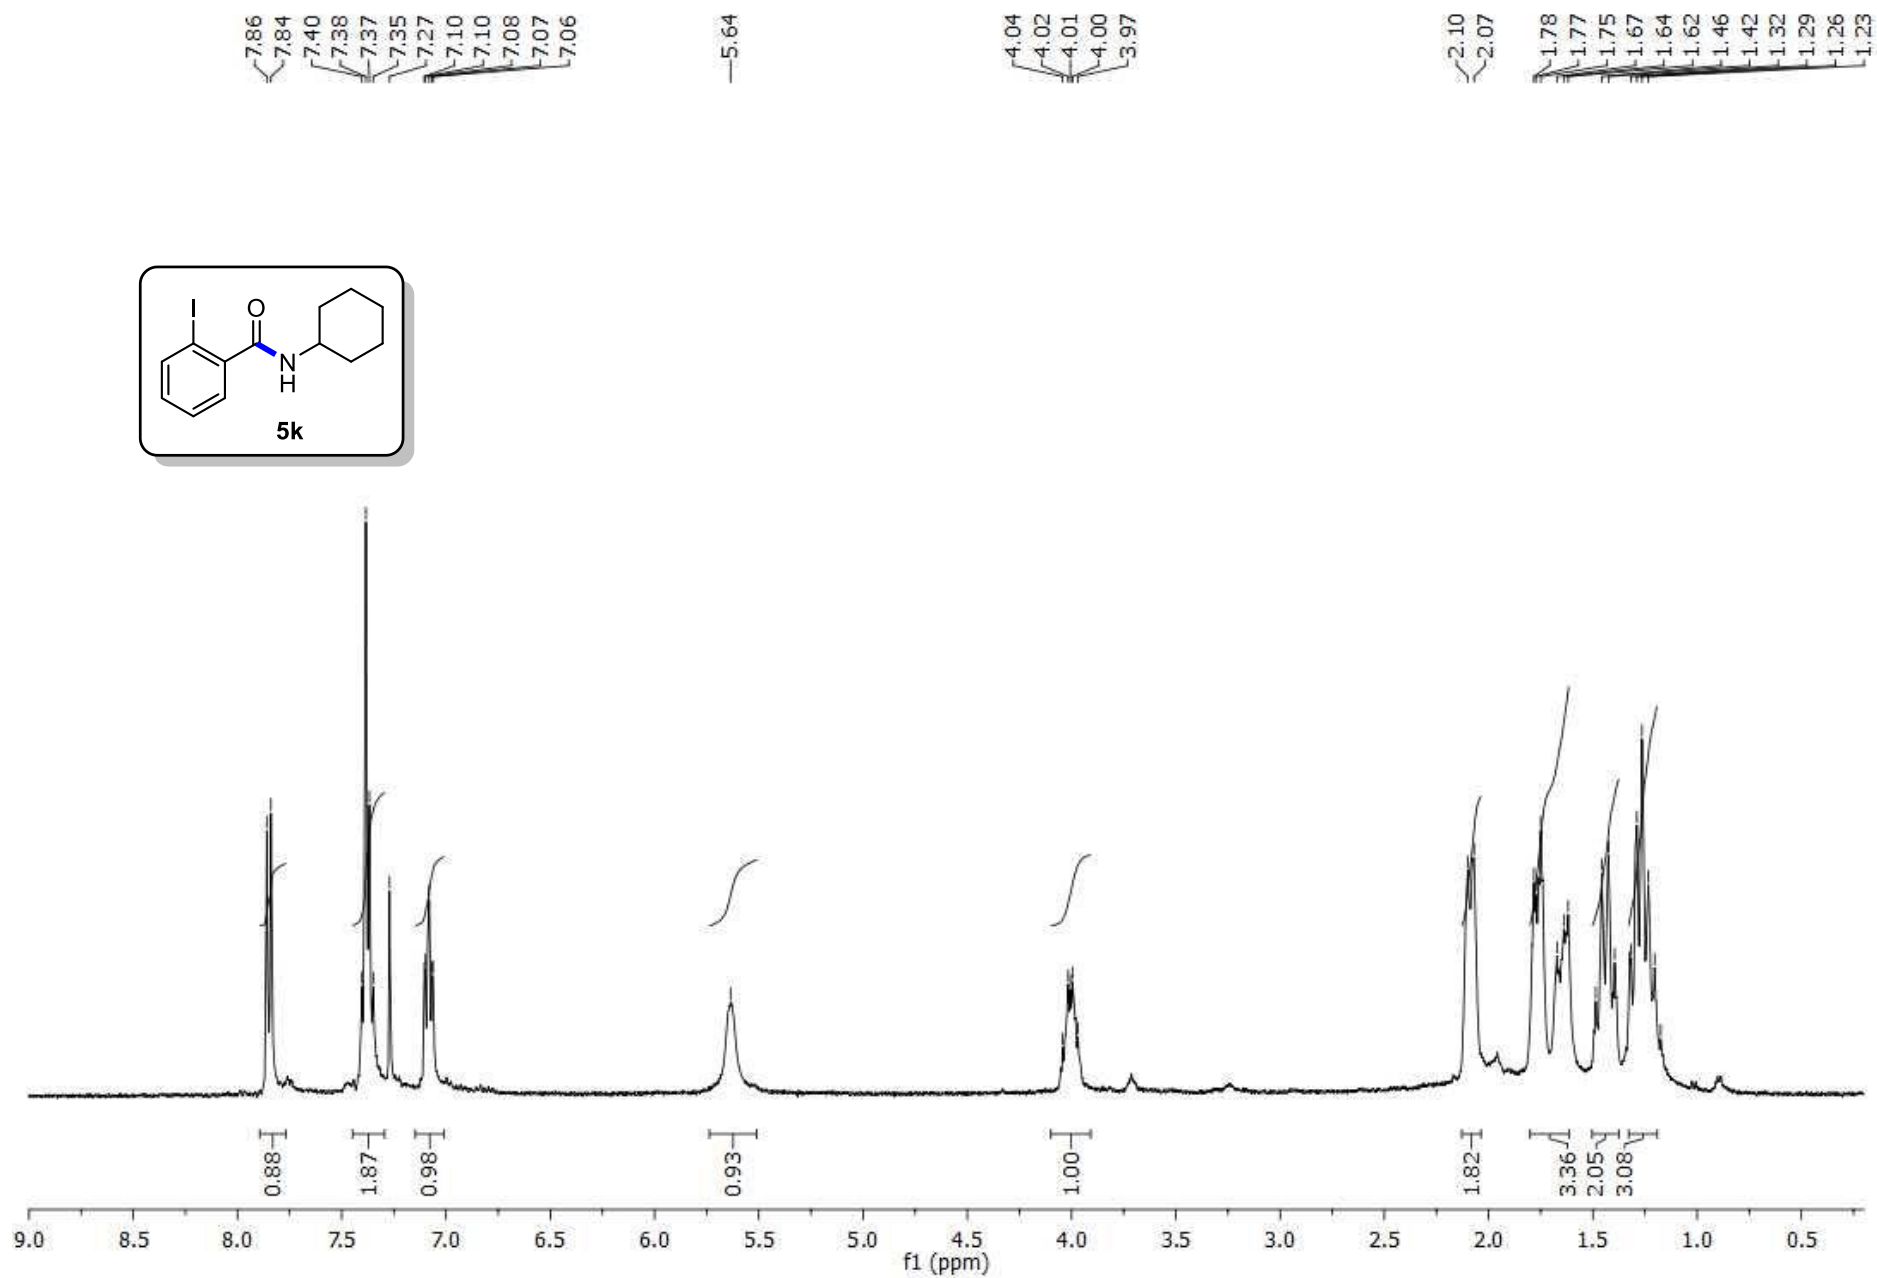

$^1\text{H}$  NMR ( $\text{CDCl}_3$ , 400 MHz) spectrum of 2-Iodo-*N*-isopropylbenzamide (**5I**)

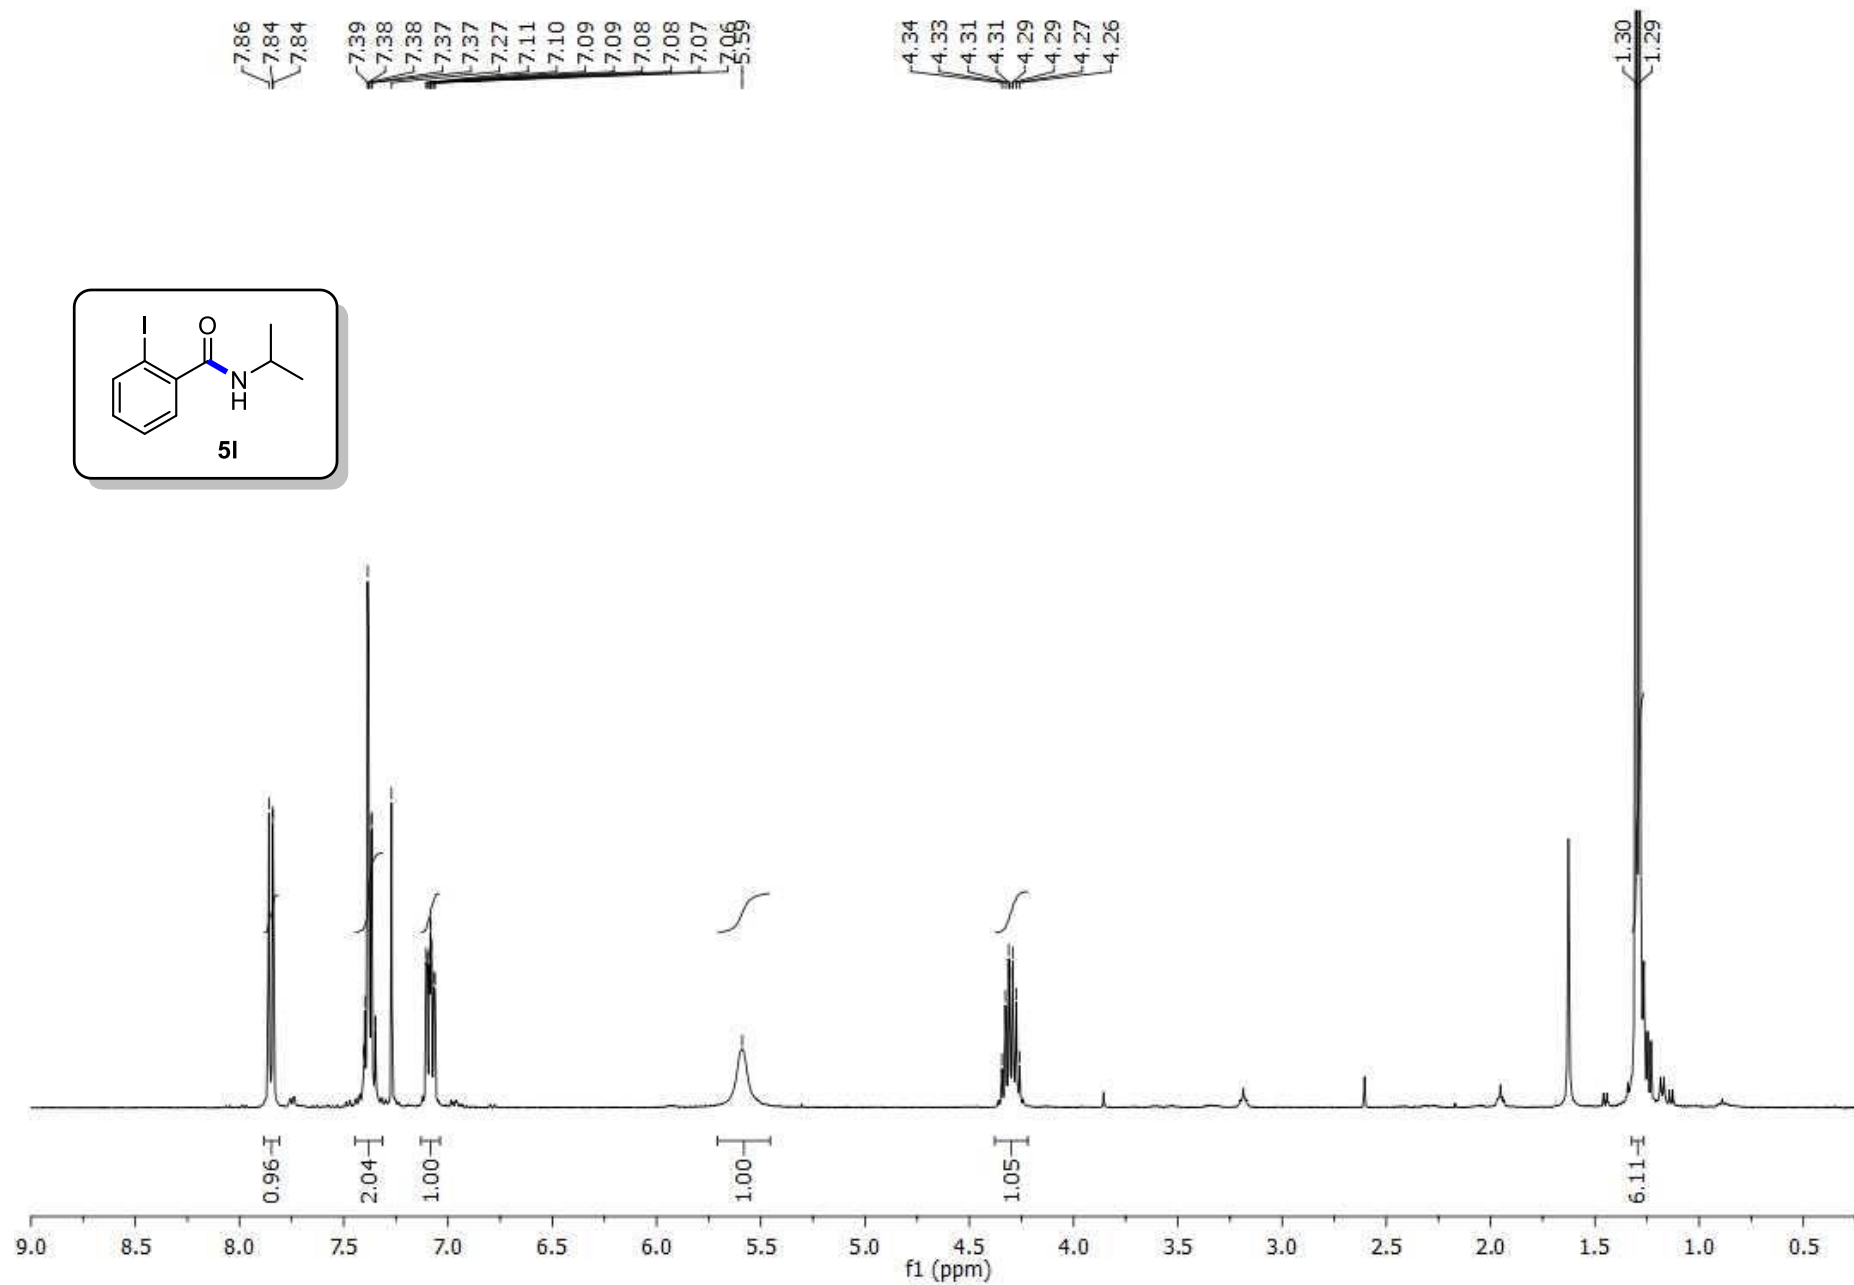

$^1\text{H}$  NMR ( $\text{CDCl}_3$ , 400 MHz) spectrum of *N*-Cyclohexylpicolinamide (**5m**)

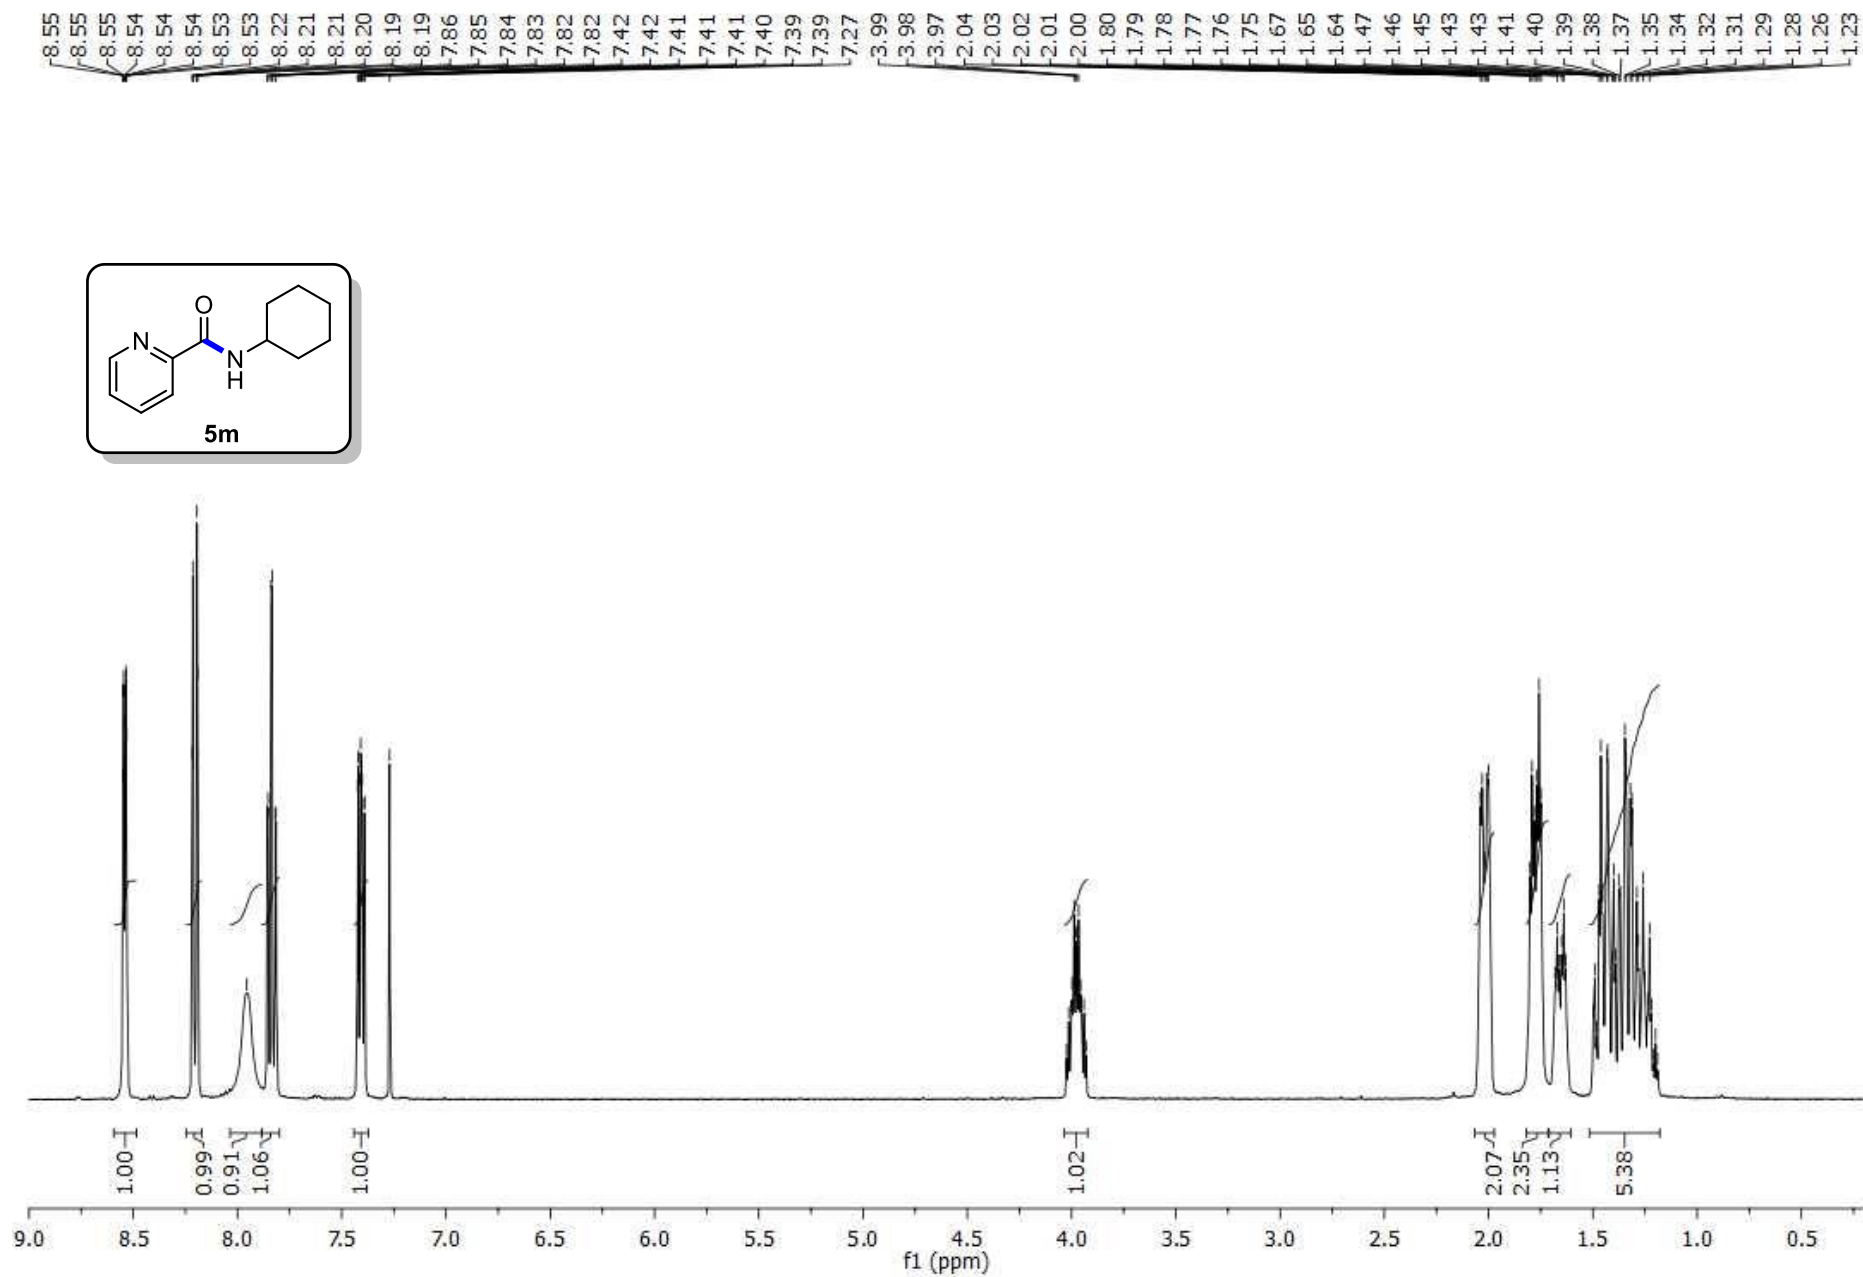



$^1\text{H}$  NMR ( $\text{CDCl}_3$ , 400 MHz) spectrum of *N*-Isopropylpicolinamide (**5n**)

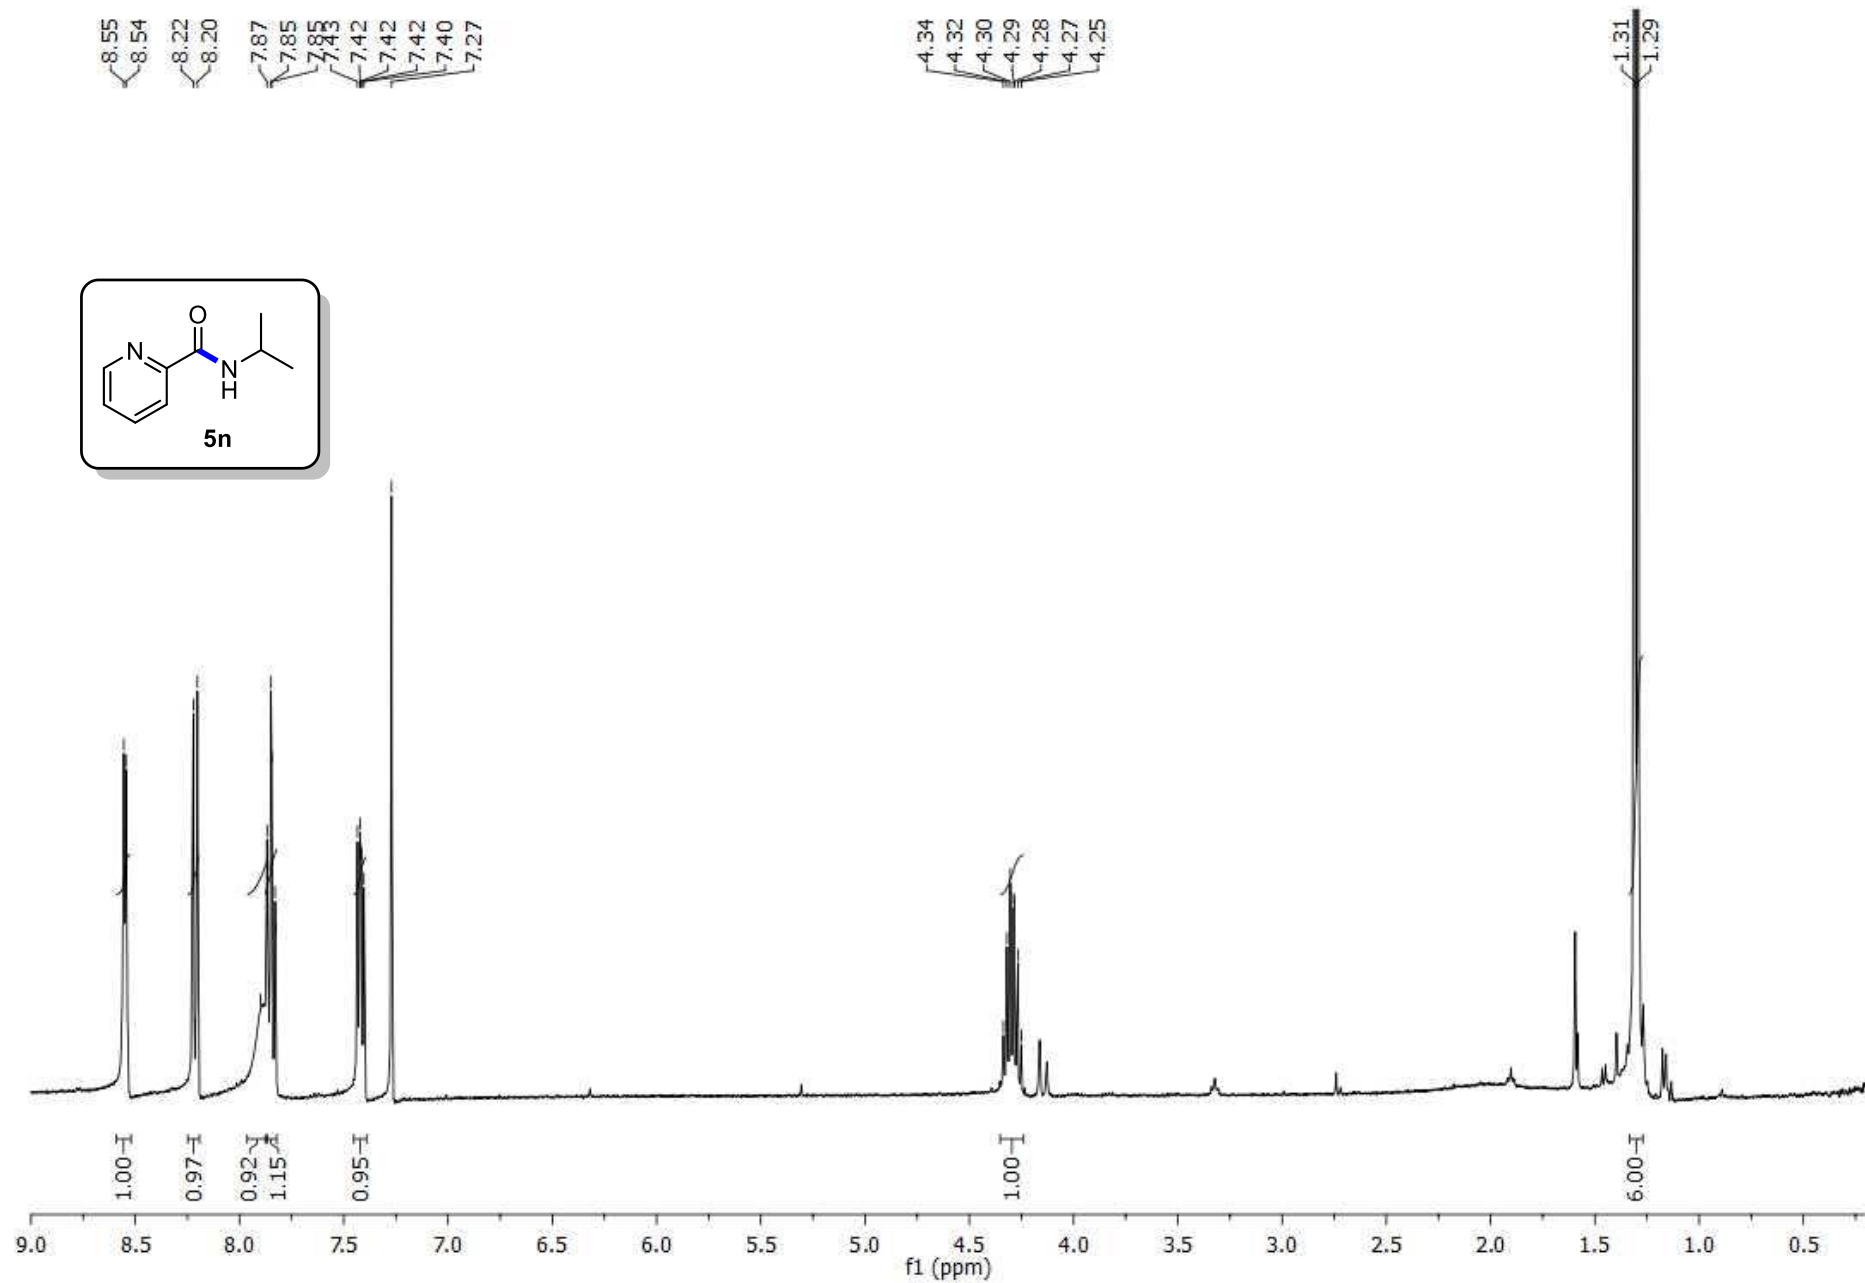

$^1\text{H}$  NMR ( $\text{CDCl}_3$ , 500 MHz) spectrum of *N*-isopropylquinoline-2-carboxamide (**5o**)

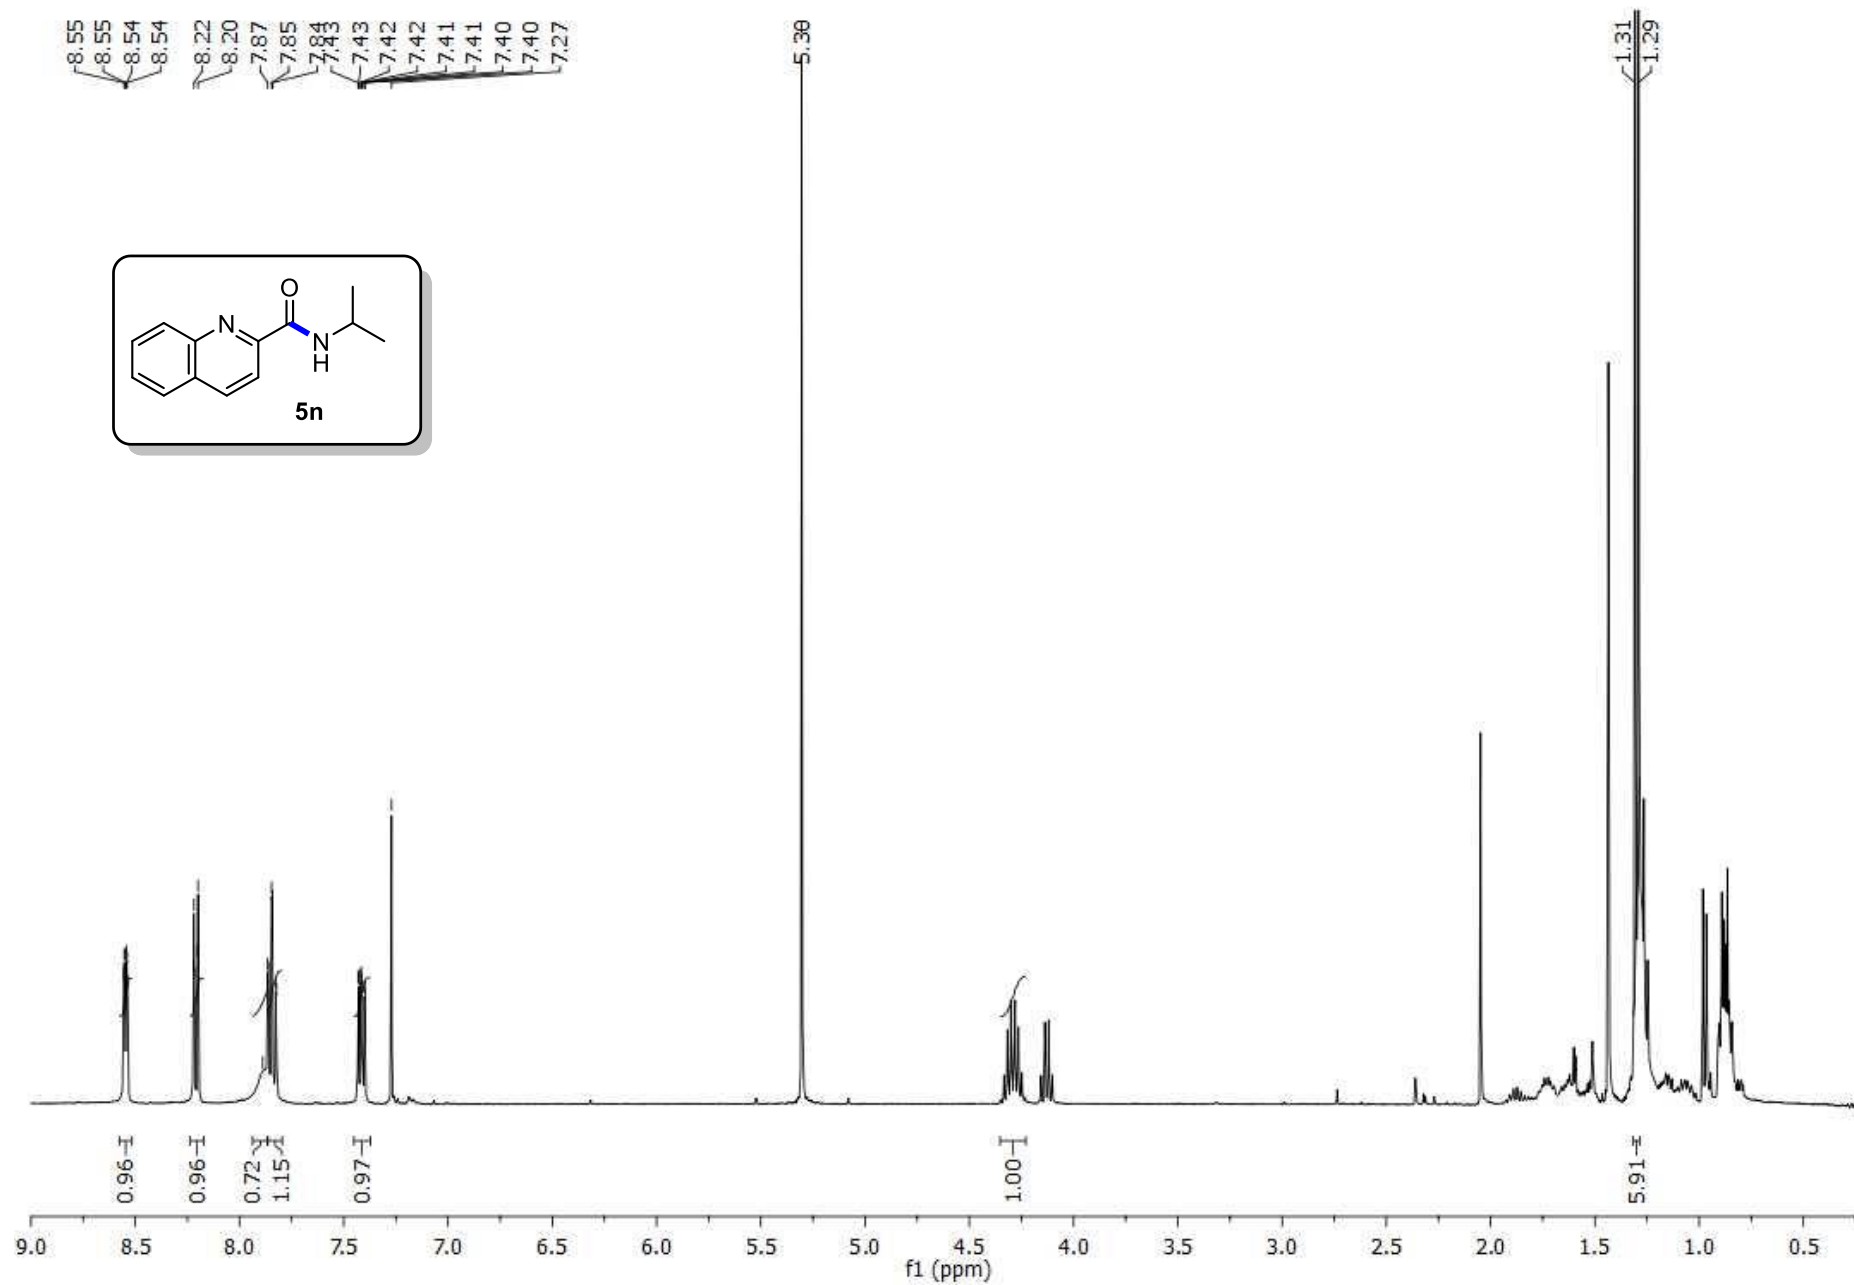

$^1\text{H}$  NMR ( $\text{CDCl}_3$ , 500 MHz) spectrum of *N*-isopropyl-3-nitrobenzamide (**5p**)

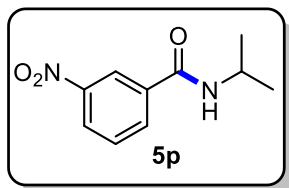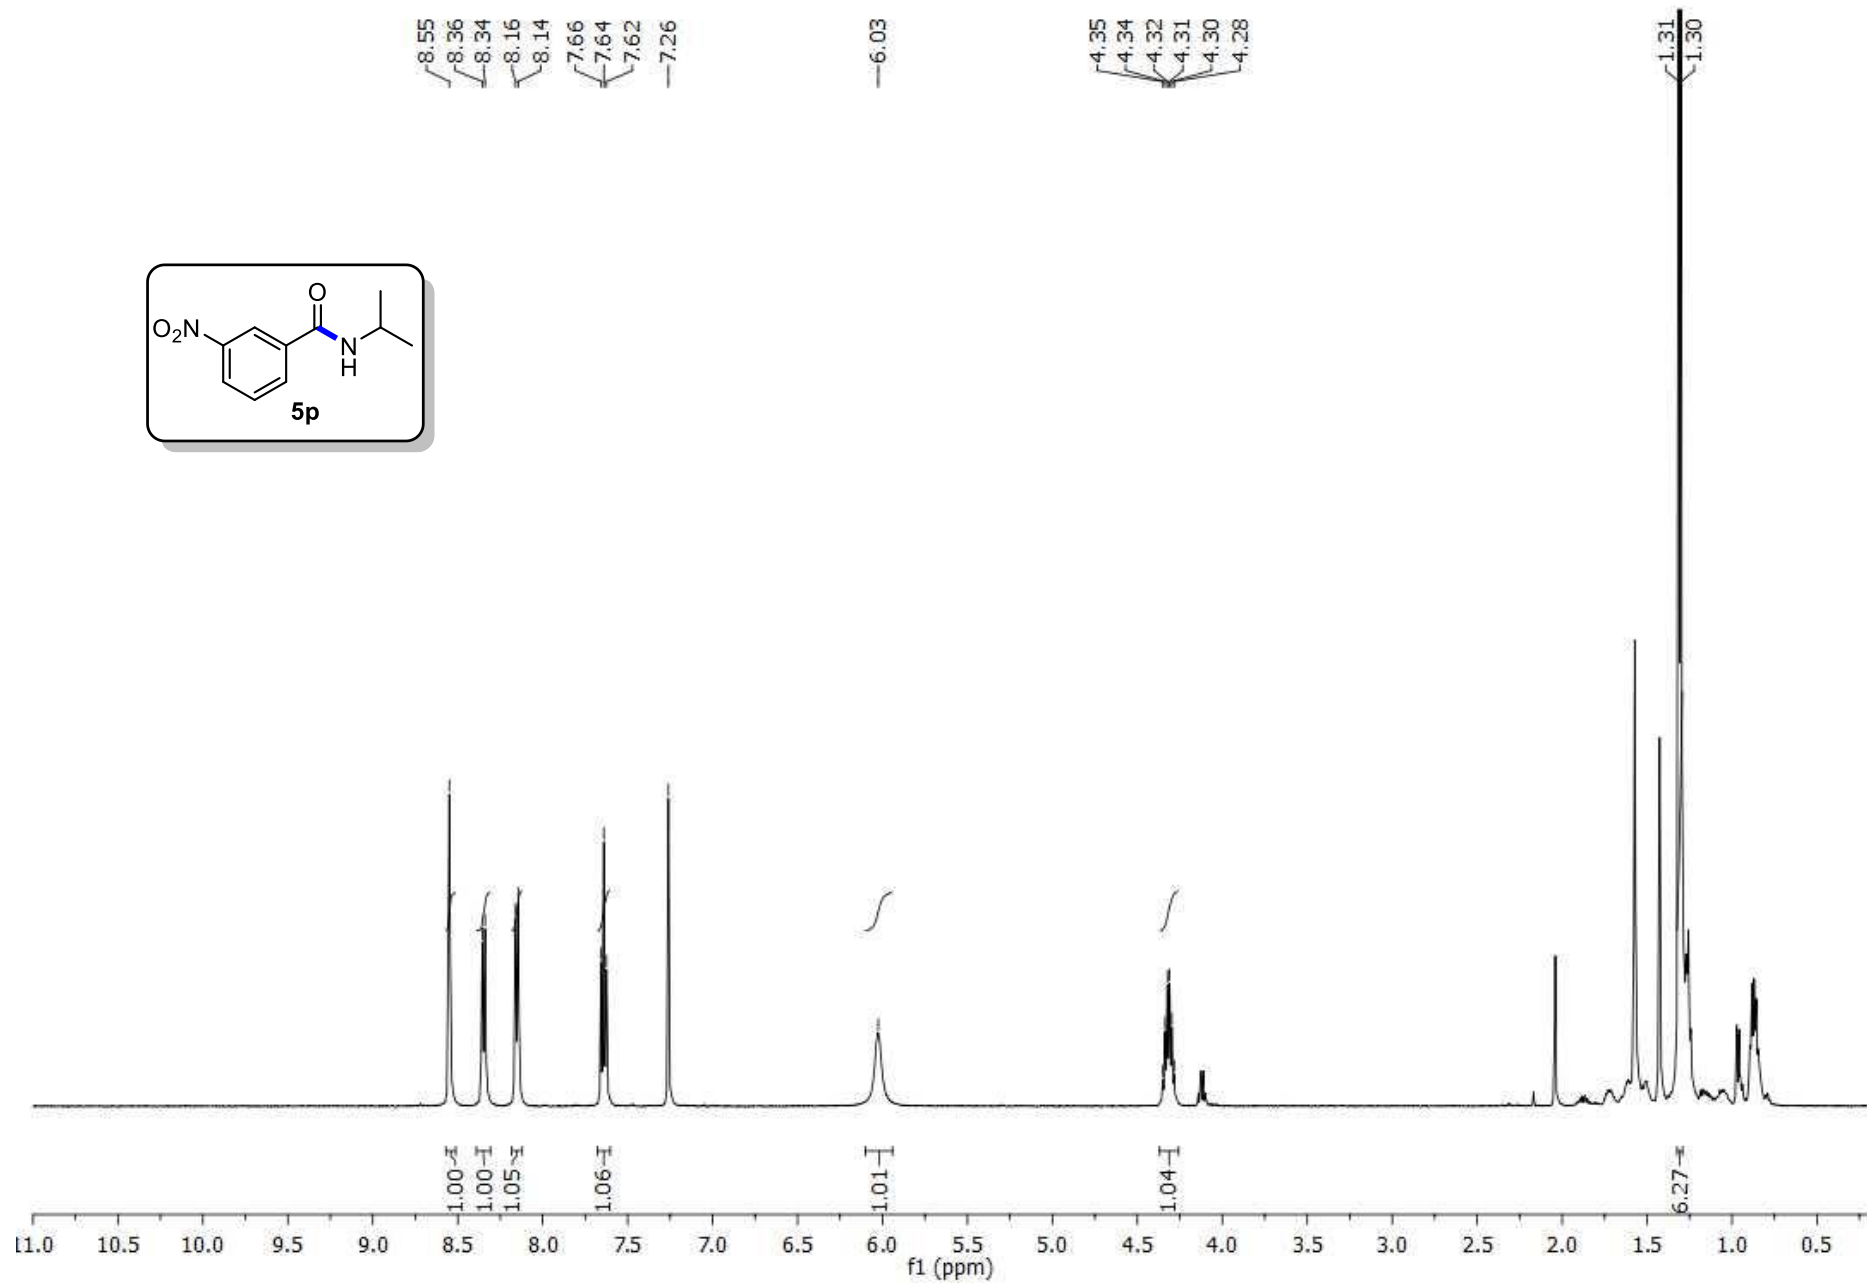

$^1\text{H}$  NMR ( $\text{CDCl}_3$ , 500 MHz) spectrum of *N*-phenylpyrrolidine-1-carboxamide (**26**)

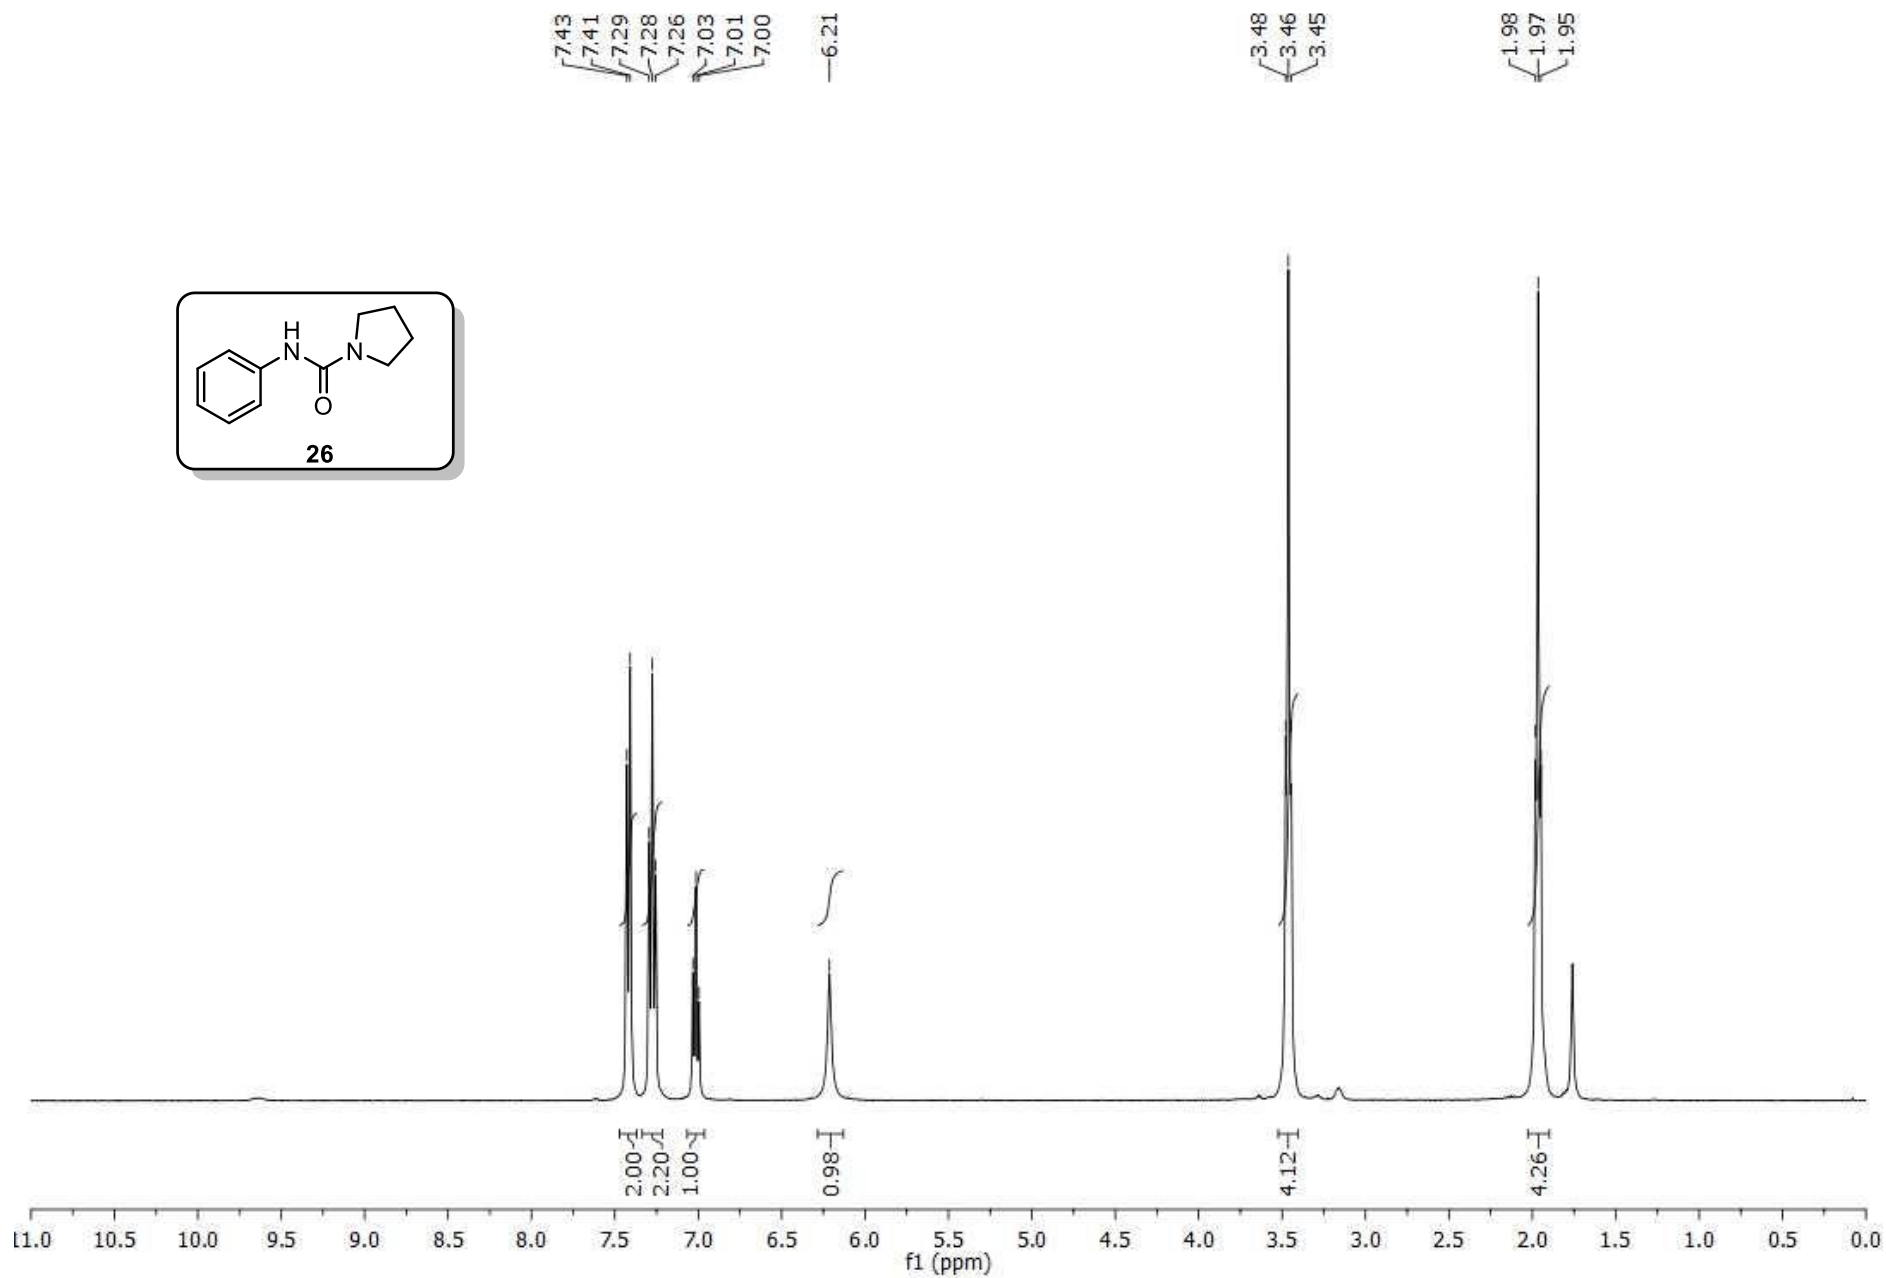

Supplement: d2ob01322c1.pdf [file d2ob01322c1.pdf]
